# Supplementary material
Source: publisher figshare collection journal article supplement (https://acs.figshare.com/ndownloader/files/7749466)
Supplement: Supplementary file 1 [file 7749466]

data_NZhao83
 
_audit_creation_method            'SHELXL-2014/7'
_shelx_SHELXL_version_number      '2014/7'
_chemical_name_systematic         ?
_chemical_name_common             ?
_chemical_melting_point           ?
_chemical_formula_moiety  'C27 H15 B Br2 Cl2 F2 N2 O3'
_chemical_formula_sum     'C27 H15 B Br2 Cl2 F2 N2 O3' 
_chemical_formula_weight          694.94

loop_
 _atom_type_symbol
 _atom_type_description
 _atom_type_scat_dispersion_real
 _atom_type_scat_dispersion_imag
 _atom_type_scat_source
 'C'  'C'   0.0181   0.0091
 'International Tables Vol C Tables 4.2.6.8 and 6.1.1.4'
 'H'  'H'   0.0000   0.0000
 'International Tables Vol C Tables 4.2.6.8 and 6.1.1.4'
 'B'  'B'   0.0090   0.0039
 'International Tables Vol C Tables 4.2.6.8 and 6.1.1.4'
 'N'  'N'   0.0311   0.0180
 'International Tables Vol C Tables 4.2.6.8 and 6.1.1.4'
 'O'  'O'   0.0492   0.0322
 'International Tables Vol C Tables 4.2.6.8 and 6.1.1.4'
 'F'  'F'   0.0727   0.0534
 'International Tables Vol C Tables 4.2.6.8 and 6.1.1.4'
 'Cl'  'Cl'   0.3639   0.7018
 'International Tables Vol C Tables 4.2.6.8 and 6.1.1.4'
 'Br'  'Br'  -0.6763   1.2805
 'International Tables Vol C Tables 4.2.6.8 and 6.1.1.4'
 
_space_group_crystal_system       monoclinic
_space_group_IT_number            4
_space_group_name_H-M_alt         'P 21'
_space_group_name_Hall            'P 2yb'
 
_shelx_space_group_comment
;
The symmetry employed for this shelxl refinement is uniquely defined
by the following loop, which should always be used as a source of
symmetry information in preference to the above space-group names.
They are only intended as comments.
;
 
loop_
 _space_group_symop_operation_xyz
 'x, y, z'
 '-x, y+1/2, -z'
 
_cell_length_a                    14.0387(10)
_cell_length_b                    5.7510(4)
_cell_length_c                    16.2336(11)
_cell_angle_alpha                 90
_cell_angle_beta                  98.473(5)
_cell_angle_gamma                 90
_cell_volume                      1296.34(16)
_cell_formula_units_Z             2
_cell_measurement_temperature     90.0(5)
_cell_measurement_reflns_used      2082
_cell_measurement_theta_min        3.18
_cell_measurement_theta_max       67.23
 
_exptl_crystal_description       'needle'
_exptl_crystal_colour            'orange'
_exptl_crystal_density_meas       ?
_exptl_crystal_density_method     ?
_exptl_crystal_density_diffrn     1.780          
_exptl_crystal_F_000              684
_exptl_transmission_factor_min    ?
_exptl_transmission_factor_max    ?
_exptl_crystal_size_max           0.150
_exptl_crystal_size_mid           0.020
_exptl_crystal_size_min           0.010
_exptl_absorpt_coefficient_mu     6.297
_shelx_estimated_absorpt_T_min    0.452
_shelx_estimated_absorpt_T_max    0.940
_exptl_absorpt_correction_type    'multi-scan' 
_exptl_absorpt_correction_T_min   0.542
_exptl_absorpt_correction_T_max   0.940
_exptl_absorpt_process_details   'SADABS (Sheldrick, 2004)' 
_exptl_absorpt_special_details    ?
_diffrn_ambient_temperature       90.0(5)
_diffrn_radiation_wavelength      1.54184
_diffrn_radiation_type            CuK\a
_diffrn_radiation_source          'I\mS microfocus'
_diffrn_radiation_monochromator   'QUAZAR multilayer optics'
_diffrn_measurement_device_type  'Bruker Kappa APEX-II DUO'
_diffrn_measurement_method       '\f and \w scans'
_diffrn_detector_area_resol_mean  ?
_diffrn_reflns_number             7138
_diffrn_reflns_av_unetI/netI      0.0782
_diffrn_reflns_av_R_equivalents   0.0593
_diffrn_reflns_limit_h_min        -15
_diffrn_reflns_limit_h_max        16
_diffrn_reflns_limit_k_min        -4
_diffrn_reflns_limit_k_max        6
_diffrn_reflns_limit_l_min        -19
_diffrn_reflns_limit_l_max        17
_diffrn_reflns_theta_min          3.183
_diffrn_reflns_theta_max          68.199
_diffrn_reflns_theta_full         67.684
_diffrn_measured_fraction_theta_max   0.987
_diffrn_measured_fraction_theta_full  0.988
_diffrn_reflns_Laue_measured_fraction_max    0.987
_diffrn_reflns_Laue_measured_fraction_full   0.988
_diffrn_reflns_point_group_measured_fraction_max   0.990
_diffrn_reflns_point_group_measured_fraction_full  0.991
_reflns_number_total              3433
_reflns_number_gt                 2753
_reflns_threshold_expression      'I > 2\s(I)'
_reflns_Friedel_coverage          0.810
_reflns_Friedel_fraction_max      0.993
_reflns_Friedel_fraction_full     0.995
 
_reflns_special_details
;
 Reflections were merged by SHELXL according to the crystal
 class for the calculation of statistics and refinement.
 
 _reflns_Friedel_fraction is defined as the number of unique
 Friedel pairs measured divided by the number that would be
 possible theoretically, ignoring centric projections and
 systematic absences.
;
 
_computing_data_collection      'Bruker APEX3'
_computing_cell_refinement      'Bruker SAINT'
_computing_data_reduction       'Bruker SAINT'  
_computing_structure_solution   'SHELXS-97 (Sheldrick, 2008)'
_computing_structure_refinement 'SHELXL-2014/7 (Sheldrick, 2014)'
_computing_molecular_graphics     ?
_computing_publication_material   ?
_refine_special_details
;
 Refined as a 2-component inversion twin.
;
_refine_ls_structure_factor_coef  Fsqd
_refine_ls_matrix_type            full
_refine_ls_weighting_scheme       calc
_refine_ls_weighting_details
'w=1/[\s^2^(Fo^2^)+(0.2000P)^2^] where P=(Fo^2^+2Fc^2^)/3'
_atom_sites_solution_primary      ?
_atom_sites_solution_secondary    ?
_atom_sites_solution_hydrogens    geom
_refine_ls_hydrogen_treatment     constr
_refine_ls_extinction_method      none
_refine_ls_extinction_coef        .
_refine_ls_abs_structure_details
;
 Refined as an inversion twin.
;
_refine_ls_abs_structure_Flack    0.37(9)
_chemical_absolute_configuration  ?
_refine_ls_number_reflns          3433
_refine_ls_number_parameters      353
_refine_ls_number_restraints      7
_refine_ls_R_factor_all           0.1175
_refine_ls_R_factor_gt            0.1002
_refine_ls_wR_factor_ref          0.2689
_refine_ls_wR_factor_gt           0.2457
_refine_ls_goodness_of_fit_ref    1.100
_refine_ls_restrained_S_all       1.100
_refine_ls_shift/su_max           0.000
_refine_ls_shift/su_mean          0.000
 
loop_
 _atom_site_label
 _atom_site_type_symbol
 _atom_site_fract_x
 _atom_site_fract_y
 _atom_site_fract_z
 _atom_site_U_iso_or_equiv
 _atom_site_adp_type
 _atom_site_occupancy
 _atom_site_site_symmetry_order  
 _atom_site_calc_flag
 _atom_site_refinement_flags_posn
 _atom_site_refinement_flags_adp
 _atom_site_refinement_flags_occupancy
 _atom_site_disorder_assembly
 _atom_site_disorder_group
Br1 Br 0.56400(13) 0.3011(3) 0.95389(10) 0.0415(5) Uani 1 1 d . . . . .
Br2 Br 0.51202(15) -0.2973(4) 0.61685(12) 0.0468(6) Uani 1 1 d . . . . .
Cl1 Cl 0.7197(3) 0.7747(9) 0.9865(3) 0.0469(11) Uani 1 1 d . . . . .
Cl2 Cl 0.6416(3) -0.2057(9) 0.4588(2) 0.0410(9) Uani 1 1 d . . . . .
F1 F 0.8663(7) 0.328(3) 0.7145(6) 0.051(3) Uani 1 1 d . . . . .
F2 F 0.7736(8) 0.622(2) 0.6480(6) 0.049(3) Uani 1 1 d . . . . .
O1 O 0.8180(8) 0.789(2) 0.8185(7) 0.035(2) Uani 1 1 d . . . . .
O2 O 0.5596(9) -0.013(3) 0.7890(8) 0.043(3) Uani 1 1 d . . . . .
O3 O 0.7785(9) 0.262(2) 0.5251(7) 0.045(3) Uani 1 1 d . . . . .
N1 N 0.7296(12) 0.467(3) 0.7744(10) 0.045(4) Uani 1 1 d . . . . .
N2 N 0.7096(11) 0.230(3) 0.6454(9) 0.044(4) Uani 1 1 d . . . . .
C1 C 0.7544(15) 0.626(4) 0.8355(12) 0.050(5) Uani 1 1 d . . . . .
C2 C 0.7068(15) 0.600(4) 0.9008(12) 0.047(5) Uani 1 1 d . . . . .
C3 C 0.6482(15) 0.410(4) 0.8809(11) 0.044(4) Uani 1 1 d . . . . .
C4 C 0.6582(12) 0.312(4) 0.8048(10) 0.041(4) Uani 1 1 d . U . . .
C5 C 0.6203(15) 0.140(3) 0.7548(12) 0.045(4) Uani 1 1 d . . . . .
C6 C 0.6385(14) 0.100(4) 0.6756(12) 0.043(4) Uani 1 1 d . . . . .
C7 C 0.6031(13) -0.069(4) 0.6144(11) 0.040(4) Uani 1 1 d . . . . .
C8 C 0.6589(15) -0.035(4) 0.5494(11) 0.047(5) Uani 1 1 d . . . . .
C9 C 0.7185(14) 0.150(3) 0.5703(12) 0.043(5) Uani 1 1 d . . . . .
C10 C 0.4610(15) 0.032(4) 0.7815(12) 0.048(5) Uani 1 1 d . . . . .
C11 C 0.4184(13) 0.233(4) 0.7483(12) 0.049(5) Uani 1 1 d . . . . .
H11 H 0.4565 0.3490 0.7271 0.058 Uiso 1 1 calc R U . . .
C12 C 0.3210(16) 0.268(4) 0.7457(13) 0.058(6) Uani 1 1 d . . . . .
H12 H 0.2921 0.4097 0.7245 0.069 Uiso 1 1 calc R U . . .
C13 C 0.2653(16) 0.095(5) 0.7741(16) 0.062(6) Uani 1 1 d . . . . .
H13 H 0.1977 0.1157 0.7710 0.074 Uiso 1 1 calc R U . . .
C14 C 0.3086(18) -0.109(6) 0.8074(16) 0.078(9) Uani 1 1 d . . . . .
H14 H 0.2695 -0.2258 0.8266 0.093 Uiso 1 1 calc R U . . .
C15 C 0.4062(15) -0.146(4) 0.8132(11) 0.047(5) Uani 1 1 d . . . . .
H15 H 0.4354 -0.2843 0.8372 0.057 Uiso 1 1 calc R U . . .
C16 C 0.9158(12) 0.770(3) 0.8573(11) 0.041(4) Uani 1 1 d . . . . .
C17 C 0.9459(16) 0.574(4) 0.9008(14) 0.051(5) Uani 1 1 d . . . . .
H17 H 0.9024 0.4506 0.9062 0.062 Uiso 1 1 calc R U . . .
C18 C 1.0450(15) 0.559(4) 0.9382(13) 0.049(5) Uani 1 1 d . . . . .
H18 H 1.0681 0.4245 0.9689 0.059 Uiso 1 1 calc R U . . .
C19 C 1.1052(14) 0.739(4) 0.9290(11) 0.051(6) Uani 1 1 d . . . . .
H19 H 1.1704 0.7350 0.9550 0.062 Uiso 1 1 calc R U . . .
C20 C 1.0696(16) 0.933(4) 0.8804(13) 0.056(6) Uani 1 1 d . . . . .
H20 H 1.1120 1.0566 0.8718 0.067 Uiso 1 1 calc R U . . .
C21 C 0.9727(13) 0.945(4) 0.8450(12) 0.045(4) Uani 1 1 d . . . . .
H21 H 0.9485 1.0758 0.8128 0.054 Uiso 1 1 calc R U . . .
C22 C 0.8305(14) 0.126(4) 0.4733(12) 0.046(4) Uani 1 1 d . . . . .
C23 C 0.8727(15) -0.082(4) 0.5001(13) 0.048(5) Uani 1 1 d . . . . .
H23 H 0.8667 -0.1434 0.5535 0.057 Uiso 1 1 calc R U . . .
C24 C 0.9267(13) -0.206(5) 0.4437(14) 0.059(5) Uani 1 1 d . . . . .
H24 H 0.9499 -0.3591 0.4557 0.071 Uiso 1 1 calc R U . . .
C25 C 0.9428(16) -0.092(5) 0.3724(15) 0.061(6) Uani 1 1 d . . . . .
H25 H 0.9848 -0.1601 0.3383 0.073 Uiso 1 1 calc R U . . .
C26 C 0.8999(17) 0.115(5) 0.3499(13) 0.061(6) Uani 1 1 d . . . . .
H26 H 0.9089 0.1799 0.2977 0.073 Uiso 1 1 calc R U . . .
C27 C 0.8435(14) 0.238(4) 0.3991(11) 0.051(5) Uani 1 1 d . . . . .
H27 H 0.8162 0.3850 0.3835 0.062 Uiso 1 1 calc R U . . .
B1 B 0.7728(15) 0.412(4) 0.6934(13) 0.042(5) Uani 1 1 d . . . . .
 
loop_
 _atom_site_aniso_label
 _atom_site_aniso_U_11
 _atom_site_aniso_U_22
 _atom_site_aniso_U_33
 _atom_site_aniso_U_23
 _atom_site_aniso_U_13
 _atom_site_aniso_U_12
Br1 0.0451(10) 0.0401(10) 0.0433(8) -0.0004(8) 0.0197(7) -0.0018(8)
Br2 0.0460(11) 0.0410(11) 0.0562(10) -0.0019(8) 0.0170(8) -0.0057(9)
Cl1 0.046(2) 0.048(3) 0.0489(19) -0.009(2) 0.0147(17) 0.000(2)
Cl2 0.045(2) 0.038(2) 0.0427(17) -0.0004(19) 0.0145(15) -0.001(2)
F1 0.035(5) 0.077(9) 0.043(5) 0.002(5) 0.015(4) 0.000(6)
F2 0.055(7) 0.041(6) 0.052(5) 0.003(5) 0.011(5) -0.004(5)
O1 0.034(6) 0.023(5) 0.051(6) 0.004(5) 0.013(5) 0.003(6)
O2 0.037(7) 0.041(7) 0.055(7) 0.003(6) 0.019(6) -0.003(6)
O3 0.044(7) 0.043(9) 0.052(6) -0.004(6) 0.020(5) 0.002(6)
N1 0.037(9) 0.038(9) 0.063(9) 0.002(7) 0.016(7) 0.000(7)
N2 0.038(8) 0.049(10) 0.049(7) -0.006(7) 0.014(6) 0.000(7)
C1 0.046(11) 0.051(13) 0.050(10) -0.004(9) 0.001(8) 0.014(10)
C2 0.047(11) 0.048(11) 0.048(9) -0.018(9) 0.010(8) 0.008(9)
C3 0.048(11) 0.043(11) 0.041(8) 0.007(8) 0.013(8) 0.006(9)
C4 0.037(6) 0.046(6) 0.044(5) 0.005(5) 0.014(5) -0.006(5)
C5 0.045(11) 0.034(11) 0.057(10) 0.006(8) 0.011(8) 0.004(8)
C6 0.042(10) 0.034(10) 0.059(10) 0.000(9) 0.020(9) 0.000(8)
C7 0.031(9) 0.045(12) 0.045(9) 0.007(8) 0.012(7) -0.006(8)
C8 0.050(11) 0.060(13) 0.036(8) 0.007(8) 0.020(8) 0.001(10)
C9 0.042(10) 0.036(12) 0.058(10) 0.014(8) 0.027(8) 0.008(8)
C10 0.044(11) 0.053(13) 0.053(10) -0.016(9) 0.026(9) -0.006(10)
C11 0.039(10) 0.050(14) 0.061(10) 0.012(9) 0.025(8) 0.014(9)
C12 0.052(12) 0.059(16) 0.066(11) 0.012(11) 0.021(9) 0.020(11)
C13 0.038(12) 0.057(14) 0.090(16) -0.011(13) 0.010(11) 0.003(11)
C14 0.060(15) 0.10(2) 0.083(15) -0.029(16) 0.042(13) -0.028(16)
C15 0.052(11) 0.046(13) 0.050(9) -0.014(8) 0.028(8) -0.004(9)
C16 0.037(9) 0.035(11) 0.054(9) -0.012(8) 0.019(7) 0.002(8)
C17 0.047(11) 0.035(11) 0.079(13) 0.001(10) 0.033(10) 0.001(9)
C18 0.040(10) 0.047(13) 0.061(11) 0.000(9) 0.011(9) 0.015(9)
C19 0.040(10) 0.066(17) 0.053(9) -0.007(10) 0.023(8) -0.001(10)
C20 0.063(14) 0.054(14) 0.056(11) 0.000(10) 0.032(10) -0.004(11)
C21 0.028(9) 0.047(12) 0.063(11) -0.002(9) 0.017(8) 0.000(8)
C22 0.044(11) 0.037(10) 0.062(11) 0.000(9) 0.019(9) -0.001(9)
C23 0.041(10) 0.041(11) 0.065(11) 0.003(9) 0.017(9) -0.008(9)
C24 0.030(9) 0.055(13) 0.094(14) 0.007(13) 0.015(9) 0.006(10)
C25 0.043(12) 0.074(17) 0.071(13) -0.021(13) 0.025(10) 0.005(12)
C26 0.056(13) 0.072(16) 0.059(11) -0.014(11) 0.026(10) 0.004(12)
C27 0.041(10) 0.060(15) 0.056(9) -0.013(9) 0.018(8) -0.007(9)
B1 0.030(10) 0.051(13) 0.045(10) 0.004(9) 0.007(8) 0.001(9)
 
_geom_special_details
;
 All esds (except the esd in the dihedral angle between two l.s. planes)
 are estimated using the full covariance matrix.  The cell esds are taken
 into account individually in the estimation of esds in distances, angles
 and torsion angles; correlations between esds in cell parameters are only
 used when they are defined by crystal symmetry.  An approximate (isotropic)
 treatment of cell esds is used for estimating esds involving l.s. planes.
;
 
loop_
 _geom_bond_atom_site_label_1
 _geom_bond_atom_site_label_2
 _geom_bond_distance
 _geom_bond_site_symmetry_2
 _geom_bond_publ_flag
Br1 C3 1.898(18) . ?
Br2 C7 1.837(18) . ?
Cl1 C2 1.703(18) . ?
Cl2 C8 1.76(2) . ?
F1 B1 1.39(2) . ?
F2 B1 1.41(3) . ?
O1 C1 1.35(3) . ?
O1 C16 1.43(2) . ?
O2 C10 1.40(2) . ?
O2 C5 1.40(2) . ?
O3 C9 1.36(2) . ?
O3 C22 1.42(2) . ?
N1 C1 1.36(3) . ?
N1 C4 1.48(2) . ?
N1 B1 1.56(3) . ?
N2 C9 1.33(2) . ?
N2 C6 1.39(2) . ?
N2 B1 1.51(3) . ?
C1 C2 1.34(3) . ?
C2 C3 1.38(3) . ?
C3 C4 1.38(3) . ?
C4 C5 1.34(3) . ?
C5 C6 1.37(3) . ?
C6 C7 1.43(3) . ?
C7 C8 1.42(2) . ?
C8 C9 1.37(3) . ?
C10 C11 1.38(3) . ?
C10 C15 1.42(3) . ?
C11 C12 1.38(3) . ?
C11 H11 0.9500 . ?
C12 C13 1.39(4) . ?
C12 H12 0.9500 . ?
C13 C14 1.39(4) . ?
C13 H13 0.9500 . ?
C14 C15 1.38(3) . ?
C14 H14 0.9500 . ?
C15 H15 0.9500 . ?
C16 C21 1.32(3) . ?
C16 C17 1.37(3) . ?
C17 C18 1.44(3) . ?
C17 H17 0.9500 . ?
C18 C19 1.36(3) . ?
C18 H18 0.9500 . ?
C19 C20 1.41(3) . ?
C19 H19 0.9500 . ?
C20 C21 1.40(3) . ?
C20 H20 0.9500 . ?
C21 H21 0.9500 . ?
C22 C23 1.38(3) . ?
C22 C27 1.40(3) . ?
C23 C24 1.46(3) . ?
C23 H23 0.9500 . ?
C24 C25 1.38(3) . ?
C24 H24 0.9500 . ?
C25 C26 1.36(4) . ?
C25 H25 0.9500 . ?
C26 C27 1.40(3) . ?
C26 H26 0.9500 . ?
C27 H27 0.9500 . ?
 
loop_
 _geom_angle_atom_site_label_1
 _geom_angle_atom_site_label_2
 _geom_angle_atom_site_label_3
 _geom_angle
 _geom_angle_site_symmetry_1
 _geom_angle_site_symmetry_3
 _geom_angle_publ_flag
C1 O1 C16 118.6(15) . . ?
C10 O2 C5 120.3(16) . . ?
C9 O3 C22 118.4(15) . . ?
C1 N1 C4 106.0(16) . . ?
C1 N1 B1 131.5(17) . . ?
C4 N1 B1 121.8(16) . . ?
C9 N2 C6 107.8(16) . . ?
C9 N2 B1 125.9(16) . . ?
C6 N2 B1 126.0(15) . . ?
C2 C1 O1 131(2) . . ?
C2 C1 N1 114(2) . . ?
O1 C1 N1 115.2(16) . . ?
C1 C2 C3 104.6(17) . . ?
C1 C2 Cl1 125.1(19) . . ?
C3 C2 Cl1 130.3(15) . . ?
C2 C3 C4 113.3(16) . . ?
C2 C3 Br1 121.3(14) . . ?
C4 C3 Br1 125.3(16) . . ?
C5 C4 C3 139.3(18) . . ?
C5 C4 N1 118.1(15) . . ?
C3 C4 N1 102.5(17) . . ?
C4 C5 C6 125.5(19) . . ?
C4 C5 O2 115.8(16) . . ?
C6 C5 O2 118.7(18) . . ?
C5 C6 N2 119.0(18) . . ?
C5 C6 C7 132.4(18) . . ?
N2 C6 C7 108.4(15) . . ?
C8 C7 C6 104.4(17) . . ?
C8 C7 Br2 125.3(16) . . ?
C6 C7 Br2 130.2(13) . . ?
C9 C8 C7 108.0(17) . . ?
C9 C8 Cl2 130.4(14) . . ?
C7 C8 Cl2 121.5(17) . . ?
N2 C9 O3 118.9(18) . . ?
N2 C9 C8 111.2(15) . . ?
O3 C9 C8 129.8(17) . . ?
C11 C10 O2 124.0(18) . . ?
C11 C10 C15 121.3(19) . . ?
O2 C10 C15 115(2) . . ?
C12 C11 C10 121(2) . . ?
C12 C11 H11 119.7 . . ?
C10 C11 H11 119.7 . . ?
C11 C12 C13 119(2) . . ?
C11 C12 H12 120.3 . . ?
C13 C12 H12 120.3 . . ?
C12 C13 C14 120(2) . . ?
C12 C13 H13 120.1 . . ?
C14 C13 H13 120.1 . . ?
C15 C14 C13 122(3) . . ?
C15 C14 H14 118.9 . . ?
C13 C14 H14 118.9 . . ?
C14 C15 C10 117(2) . . ?
C14 C15 H15 121.7 . . ?
C10 C15 H15 121.7 . . ?
C21 C16 C17 124.1(19) . . ?
C21 C16 O1 116.2(18) . . ?
C17 C16 O1 119.7(17) . . ?
C16 C17 C18 118.5(19) . . ?
C16 C17 H17 120.8 . . ?
C18 C17 H17 120.8 . . ?
C19 C18 C17 119(2) . . ?
C19 C18 H18 120.5 . . ?
C17 C18 H18 120.5 . . ?
C18 C19 C20 119(2) . . ?
C18 C19 H19 120.4 . . ?
C20 C19 H19 120.4 . . ?
C21 C20 C19 121(2) . . ?
C21 C20 H20 119.7 . . ?
C19 C20 H20 119.7 . . ?
C16 C21 C20 118(2) . . ?
C16 C21 H21 120.8 . . ?
C20 C21 H21 120.8 . . ?
C23 C22 C27 124.4(19) . . ?
C23 C22 O3 121.5(17) . . ?
C27 C22 O3 113.7(18) . . ?
C22 C23 C24 117.6(19) . . ?
C22 C23 H23 121.2 . . ?
C24 C23 H23 121.2 . . ?
C25 C24 C23 118(2) . . ?
C25 C24 H24 121.2 . . ?
C23 C24 H24 121.2 . . ?
C26 C25 C24 121(2) . . ?
C26 C25 H25 119.3 . . ?
C24 C25 H25 119.3 . . ?
C25 C26 C27 124(2) . . ?
C25 C26 H26 118.2 . . ?
C27 C26 H26 118.2 . . ?
C26 C27 C22 115(2) . . ?
C26 C27 H27 122.6 . . ?
C22 C27 H27 122.6 . . ?
F1 B1 F2 110.2(16) . . ?
F1 B1 N2 110.3(18) . . ?
F2 B1 N2 111.7(15) . . ?
F1 B1 N1 109.5(15) . . ?
F2 B1 N1 107.5(17) . . ?
N2 B1 N1 107.6(15) . . ?
 
loop_
 _geom_torsion_atom_site_label_1
 _geom_torsion_atom_site_label_2
 _geom_torsion_atom_site_label_3
 _geom_torsion_atom_site_label_4
 _geom_torsion
 _geom_torsion_site_symmetry_1
 _geom_torsion_site_symmetry_2
 _geom_torsion_site_symmetry_3
 _geom_torsion_site_symmetry_4
 _geom_torsion_publ_flag
C16 O1 C1 C2 80(3) . . . . ?
C16 O1 C1 N1 -104.1(18) . . . . ?
C4 N1 C1 C2 -2(2) . . . . ?
B1 N1 C1 C2 -172(2) . . . . ?
C4 N1 C1 O1 -178.3(16) . . . . ?
B1 N1 C1 O1 11(3) . . . . ?
O1 C1 C2 C3 177(2) . . . . ?
N1 C1 C2 C3 1(2) . . . . ?
O1 C1 C2 Cl1 -3(3) . . . . ?
N1 C1 C2 Cl1 -178.8(15) . . . . ?
C1 C2 C3 C4 1(2) . . . . ?
Cl1 C2 C3 C4 -179.9(17) . . . . ?
C1 C2 C3 Br1 -179.5(15) . . . . ?
Cl1 C2 C3 Br1 0(3) . . . . ?
C2 C3 C4 C5 -177(3) . . . . ?
Br1 C3 C4 C5 3(4) . . . . ?
C2 C3 C4 N1 -2(2) . . . . ?
Br1 C3 C4 N1 178.5(14) . . . . ?
C1 N1 C4 C5 178.7(18) . . . . ?
B1 N1 C4 C5 -10(3) . . . . ?
C1 N1 C4 C3 2(2) . . . . ?
B1 N1 C4 C3 173.6(17) . . . . ?
C3 C4 C5 C6 172(2) . . . . ?
N1 C4 C5 C6 -3(3) . . . . ?
C3 C4 C5 O2 -10(4) . . . . ?
N1 C4 C5 O2 174.7(16) . . . . ?
C10 O2 C5 C4 90(2) . . . . ?
C10 O2 C5 C6 -92(2) . . . . ?
C4 C5 C6 N2 7(3) . . . . ?
O2 C5 C6 N2 -170.6(17) . . . . ?
C4 C5 C6 C7 -178(2) . . . . ?
O2 C5 C6 C7 4(3) . . . . ?
C9 N2 C6 C5 175.8(18) . . . . ?
B1 N2 C6 C5 2(3) . . . . ?
C9 N2 C6 C7 0(2) . . . . ?
B1 N2 C6 C7 -173.6(18) . . . . ?
C5 C6 C7 C8 -173(2) . . . . ?
N2 C6 C7 C8 2(2) . . . . ?
C5 C6 C7 Br2 3(4) . . . . ?
N2 C6 C7 Br2 178.2(15) . . . . ?
C6 C7 C8 C9 -3(2) . . . . ?
Br2 C7 C8 C9 -179.7(14) . . . . ?
C6 C7 C8 Cl2 179.8(15) . . . . ?
Br2 C7 C8 Cl2 3(3) . . . . ?
C6 N2 C9 O3 175.0(17) . . . . ?
B1 N2 C9 O3 -11(3) . . . . ?
C6 N2 C9 C8 -2(2) . . . . ?
B1 N2 C9 C8 171.5(18) . . . . ?
C22 O3 C9 N2 144.7(18) . . . . ?
C22 O3 C9 C8 -39(3) . . . . ?
C7 C8 C9 N2 3(2) . . . . ?
Cl2 C8 C9 N2 -179.8(17) . . . . ?
C7 C8 C9 O3 -173.4(19) . . . . ?
Cl2 C8 C9 O3 3(3) . . . . ?
C5 O2 C10 C11 -7(3) . . . . ?
C5 O2 C10 C15 175.2(16) . . . . ?
O2 C10 C11 C12 -177.6(19) . . . . ?
C15 C10 C11 C12 1(3) . . . . ?
C10 C11 C12 C13 -2(3) . . . . ?
C11 C12 C13 C14 2(4) . . . . ?
C12 C13 C14 C15 0(4) . . . . ?
C13 C14 C15 C10 -2(3) . . . . ?
C11 C10 C15 C14 1(3) . . . . ?
O2 C10 C15 C14 179.7(18) . . . . ?
C1 O1 C16 C21 -173.8(16) . . . . ?
C1 O1 C16 C17 9(2) . . . . ?
C21 C16 C17 C18 2(3) . . . . ?
O1 C16 C17 C18 179.2(15) . . . . ?
C16 C17 C18 C19 0(3) . . . . ?
C17 C18 C19 C20 -2(3) . . . . ?
C18 C19 C20 C21 3(3) . . . . ?
C17 C16 C21 C20 -2(3) . . . . ?
O1 C16 C21 C20 -178.9(15) . . . . ?
C19 C20 C21 C16 -1(3) . . . . ?
C9 O3 C22 C23 -42(3) . . . . ?
C9 O3 C22 C27 145.1(18) . . . . ?
C27 C22 C23 C24 -6(3) . . . . ?
O3 C22 C23 C24 -178.3(18) . . . . ?
C22 C23 C24 C25 8(3) . . . . ?
C23 C24 C25 C26 -8(4) . . . . ?
C24 C25 C26 C27 5(4) . . . . ?
C25 C26 C27 C22 -3(3) . . . . ?
C23 C22 C27 C26 3(3) . . . . ?
O3 C22 C27 C26 175.8(18) . . . . ?
C9 N2 B1 F1 -66(2) . . . . ?
C6 N2 B1 F1 107(2) . . . . ?
C9 N2 B1 F2 57(3) . . . . ?
C6 N2 B1 F2 -130.2(19) . . . . ?
C9 N2 B1 N1 174.8(18) . . . . ?
C6 N2 B1 N1 -12(3) . . . . ?
C1 N1 B1 F1 65(3) . . . . ?
C4 N1 B1 F1 -104(2) . . . . ?
C1 N1 B1 F2 -54(3) . . . . ?
C4 N1 B1 F2 136.3(17) . . . . ?
C1 N1 B1 N2 -174.9(19) . . . . ?
C4 N1 B1 N2 16(2) . . . . ?
 
_refine_diff_density_max    5.260
_refine_diff_density_min   -1.091
_refine_diff_density_rms    0.265

_shelx_res_file
;

    NZhao83.res created by SHELXL-2014/7


TITL NZhao83 in P2(1)
CELL 1.54184  14.03870   5.75100  16.23360  90.0000  98.4727  90.0000
ZERR    2.00   0.00100   0.00040   0.00110   0.0000   0.0052   0.0000
LATT -1
SYMM -X, 0.5+Y, -Z
SFAC C  H  B  N  O  F  Cl Br
UNIT 54  30  2  4  6  4  4  4
L.S. 15
ACTA
CONF
ISOR .005 C4
BOND $H
FMAP 2
PLAN 10
TWIN
SIZE 0.01 0.02 0.15
TEMP -183
WGHT    0.200000
BASF   0.37459
FVAR       0.13007
MOLE 1
BR1   8    0.564001    0.301066    0.953886    11.00000    0.04509    0.04014 =
         0.04332   -0.00036    0.01970   -0.00179
BR2   8    0.512018   -0.297276    0.616853    11.00000    0.04596    0.04102 =
         0.05616   -0.00193    0.01697   -0.00572
CL1   7    0.719749    0.774682    0.986483    11.00000    0.04596    0.04823 =
         0.04889   -0.00881    0.01470   -0.00048
CL2   7    0.641644   -0.205747    0.458788    11.00000    0.04466    0.03796 =
         0.04269   -0.00038    0.01455   -0.00079
F1    6    0.866275    0.327712    0.714457    11.00000    0.03550    0.07699 =
         0.04323    0.00178    0.01530   -0.00041
F2    6    0.773614    0.621667    0.648005    11.00000    0.05523    0.04051 =
         0.05169    0.00262    0.01135   -0.00359
O1    5    0.817989    0.789370    0.818492    11.00000    0.03442    0.02271 =
         0.05073    0.00440    0.01256    0.00329
O2    5    0.559628   -0.012961    0.789049    11.00000    0.03716    0.04065 =
         0.05476    0.00307    0.01946   -0.00279
O3    5    0.778478    0.261637    0.525083    11.00000    0.04414    0.04269 =
         0.05237   -0.00401    0.01958    0.00156
N1    4    0.729603    0.466740    0.774382    11.00000    0.03677    0.03792 =
         0.06277    0.00243    0.01587    0.00010
N2    4    0.709593    0.230430    0.645431    11.00000    0.03780    0.04875 =
         0.04909   -0.00557    0.01397   -0.00006
C1    1    0.754362    0.626123    0.835481    11.00000    0.04646    0.05098 =
         0.04978   -0.00426    0.00124    0.01389
C2    1    0.706790    0.600303    0.900776    11.00000    0.04666    0.04825 =
         0.04828   -0.01752    0.00966    0.00802
C3    1    0.648175    0.409655    0.880920    11.00000    0.04807    0.04320 =
         0.04132    0.00674    0.01318    0.00645
C4    1    0.658174    0.311969    0.804766    11.00000    0.03704    0.04588 =
         0.04372    0.00512    0.01443   -0.00612
C5    1    0.620328    0.139962    0.754771    11.00000    0.04462    0.03370 =
         0.05728    0.00551    0.01051    0.00356
C6    1    0.638548    0.100245    0.675599    11.00000    0.04206    0.03353 =
         0.05861   -0.00021    0.02038   -0.00035
C7    1    0.603052   -0.068911    0.614397    11.00000    0.03120    0.04543 =
         0.04508    0.00704    0.01172   -0.00603
C8    1    0.658871   -0.034612    0.549420    11.00000    0.05036    0.06007 =
         0.03559    0.00747    0.01988    0.00107
C9    1    0.718460    0.150416    0.570298    11.00000    0.04211    0.03584 =
         0.05823    0.01407    0.02735    0.00831
C10   1    0.461048    0.031736    0.781463    11.00000    0.04439    0.05270 =
         0.05329   -0.01605    0.02555   -0.00572
C11   1    0.418364    0.233217    0.748332    11.00000    0.03905    0.05034 =
         0.06135    0.01173    0.02474    0.01352
AFIX  43
H11   2    0.456462    0.349044    0.727130    11.00000   -1.20000
AFIX   0
C12   1    0.320953    0.268241    0.745671    11.00000    0.05231    0.05874 =
         0.06577    0.01209    0.02083    0.01958
AFIX  43
H12   2    0.292146    0.409711    0.724516    11.00000   -1.20000
AFIX   0
C13   1    0.265307    0.095205    0.774139    11.00000    0.03807    0.05653 =
         0.09009   -0.01091    0.00960    0.00294
AFIX  43
H13   2    0.197721    0.115676    0.771006    11.00000   -1.20000
AFIX   0
C14   1    0.308631   -0.108775    0.807351    11.00000    0.05957    0.10081 =
         0.08264   -0.02918    0.04214   -0.02772
AFIX  43
H14   2    0.269537   -0.225804    0.826610    11.00000   -1.20000
AFIX   0
C15   1    0.406158   -0.146334    0.813180    11.00000    0.05191    0.04592 =
         0.05047   -0.01438    0.02756   -0.00350
AFIX  43
H15   2    0.435405   -0.284267    0.837182    11.00000   -1.20000
AFIX   0
C16   1    0.915812    0.770474    0.857284    11.00000    0.03651    0.03496 =
         0.05391   -0.01211    0.01947    0.00175
C17   1    0.945936    0.574116    0.900830    11.00000    0.04679    0.03535 =
         0.07932    0.00121    0.03344    0.00123
AFIX  43
H17   2    0.902362    0.450585    0.906245    11.00000   -1.20000
AFIX   0
C18   1    1.044974    0.558767    0.938221    11.00000    0.04008    0.04678 =
         0.06103   -0.00037    0.01120    0.01530
AFIX  43
H18   2    1.068129    0.424526    0.968933    11.00000   -1.20000
AFIX   0
C19   1    1.105224    0.739247    0.929048    11.00000    0.04016    0.06613 =
         0.05265   -0.00656    0.02284   -0.00058
AFIX  43
H19   2    1.170434    0.735032    0.955000    11.00000   -1.20000
AFIX   0
C20   1    1.069636    0.933057    0.880450    11.00000    0.06308    0.05426 =
         0.05638   -0.00047    0.03250   -0.00371
AFIX  43
H20   2    1.111987    1.056558    0.871768    11.00000   -1.20000
AFIX   0
C21   1    0.972686    0.944873    0.845005    11.00000    0.02848    0.04693 =
         0.06257   -0.00154    0.01710   -0.00041
AFIX  43
H21   2    0.948503    1.075766    0.812829    11.00000   -1.20000
AFIX   0
C22   1    0.830494    0.126205    0.473292    11.00000    0.04434    0.03699 =
         0.06157    0.00004    0.01938   -0.00096
C23   1    0.872660   -0.082410    0.500125    11.00000    0.04089    0.04073 =
         0.06480    0.00282    0.01672   -0.00847
AFIX  43
H23   2    0.866681   -0.143413    0.553506    11.00000   -1.20000
AFIX   0
C24   1    0.926682   -0.205850    0.443698    11.00000    0.03007    0.05473 =
         0.09411    0.00695    0.01459    0.00620
AFIX  43
H24   2    0.949901   -0.359135    0.455676    11.00000   -1.20000
AFIX   0
C25   1    0.942847   -0.092369    0.372441    11.00000    0.04306    0.07446 =
         0.07097   -0.02113    0.02501    0.00502
AFIX  43
H25   2    0.984803   -0.160082    0.338273    11.00000   -1.20000
AFIX   0
C26   1    0.899937    0.115044    0.349878    11.00000    0.05625    0.07164 =
         0.05913   -0.01423    0.02554    0.00434
AFIX  43
H26   2    0.908887    0.179923    0.297748    11.00000   -1.20000
AFIX   0
C27   1    0.843541    0.237579    0.399095    11.00000    0.04145    0.06003 =
         0.05630   -0.01297    0.01816   -0.00737
AFIX  43
H27   2    0.816154    0.385024    0.383464    11.00000   -1.20000
AFIX   0
B1    3    0.772834    0.411986    0.693420    11.00000    0.03000    0.05083 =
         0.04474    0.00353    0.00651    0.00104
HKLF 4

REM  NZhao83 in P2(1)
REM R1 =  0.1002 for    2753 Fo > 4sig(Fo)  and  0.1175 for all    3433 data
REM    353 parameters refined using      7 restraints

END

WGHT      0.2000      0.0000

REM Highest difference peak  5.260,  deepest hole -1.091,  1-sigma level  0.265
Q1    1   0.5156 -0.1227  0.6169  11.00000  0.05    5.26
Q2    1   0.5663  0.1346  0.9521  11.00000  0.05    2.89
Q3    1   0.5116 -0.4767  0.6210  11.00000  0.05    1.62
Q4    1   0.5226 -0.2937  0.6685  11.00000  0.05    1.56
Q5    1   0.4940 -0.2940  0.5606  11.00000  0.05    1.48
Q6    1   0.7741 -0.0463  0.6468  11.00000  0.05    1.21
Q7    1   0.6428 -0.3595  0.4534  11.00000  0.05    1.14
Q8    1   0.7258  0.7533  1.0306  11.00000  0.05    1.13
Q9    1   0.5382 -0.3488  0.7214  11.00000  0.05    1.12
Q10   1   0.6992  0.9851  0.8958  11.00000  0.05    1.02
;
_shelx_res_checksum   75679

_shelx_hkl_file
;
  -1   0   0  297.67   18.57
   1   0   0  287.32   18.57
  -2   0   0    5.13    0.50
  -2   0   0    6.74    0.52
   2   0   0    6.19    0.53
   3   0   0    1.95    0.41
  -3   0   0    2.30    0.44
   4   0   0   10.70    0.91
  -4   0   0   11.18    0.96
   5   0   0   73.64    4.72
  -5   0   0   71.87    4.76
  -6   0   0   11.99    1.18
   6   0   0   12.37    1.07
  -7   0   0   -0.72    0.65
   7   0   0   -0.83    0.58
   8   0   0    1.79    0.65
  10   0   0    3.46    0.98
  11   0   0    1.38    1.06
  11   0   0    0.20    1.40
  11   0   0    0.53    1.19
  12   0   0   -0.52    1.12
  12   0   0   -0.34    1.28
  12   0   0   -0.33    1.21
  12   0   0   -1.56    1.54
  13   0   0   18.60    2.44
  13   0   0   11.51    1.66
  14   0   0   26.44    2.25
  14   0   0   23.38    2.70
  15   0   0    5.59    1.34
  15   0   0    7.15    1.09
  16   0   0   -0.07    0.63
   0  -1   0   -0.73    0.22
   0   1   0   -0.74    0.27
  -1  -1   0    4.77    0.46
   1   1   0    4.66    0.54
   2  -1   0    2.80    0.34
   2   1   0    2.12    0.47
   3   1   0   62.91    4.39
  -3   1   0   72.25    4.36
  -4  -1   0   89.77    6.20
   4  -1   0  101.83    6.16
   4   1   0   97.11    6.23
  -4   1   0   96.56    6.21
   5  -1   0   31.77    2.14
  -5   1   0   34.02    2.25
   5   1   0   31.56    2.25
   6  -1   0   29.35    2.06
  -6   1   0   32.58    2.20
   6   1   0   31.14    2.19
  -7   1   0    3.65    0.81
   7   1   0    4.21    0.76
  -8   1   0   11.56    1.23
  -9   1   0   15.59    1.59
  10   1   0   51.74    3.82
  10   1   0   52.47    4.18
  10   1   0   56.99    3.84
  11  -1   0   16.47    2.21
  11   1   0   18.55    2.36
  11   1   0   20.18    1.87
  11   1   0   20.57    2.13
  11   1   0   17.76    1.98
  12  -1   0   10.35    1.92
  12  -1   0   10.52    1.40
  12   1   0    9.22    1.78
  12   1   0    8.72    1.52
  12   1   0    9.39    1.32
  12   1   0   10.13    1.54
  13  -1   0   10.54    1.93
  13  -1   0   11.00    1.44
  13   1   0    7.95    1.24
  13   1   0    6.09    1.52
  13   1   0    9.69    1.48
  14  -1   0   10.11    1.94
  14  -1   0   14.78    1.52
  14   1   0    9.36    1.15
  14   1   0    7.22    1.33
  14   1   0    6.57    1.34
  15  -1   0    5.18    1.06
  15  -1   0    5.85    1.51
  15   1   0    3.22    1.05
  15   1   0    3.20    0.77
  16  -1   0    1.02    0.68
  16  -1   0   -0.38    0.94
  16   1   0    1.10    0.45
   0   2   0  402.42   25.92
   0   2   0  416.61   25.93
   0   2   0  405.18   26.03
   1   2   0  129.70    8.46
  -1   2   0  123.31    8.41
   1   2   0  134.16    8.33
  -1   2   0  133.53    8.30
  -2   2   0    4.18    0.44
  -2   2   0    5.41    0.73
   2   2   0    3.73    0.62
   2   2   0    4.65    0.92
  -3   2   0   60.88    3.68
   3   2   0   57.23    3.74
  -3   2   0   54.69    3.80
   3   2   0   53.06    3.93
  -4   2   0   64.96    4.07
   4   2   0   60.18    4.15
   5   2   0   27.79    2.00
  -5   2   0   26.65    1.89
   6   2   0    5.29    0.92
  -6   2   0    7.83    0.82
  -7   2   0   17.61    1.44
  -8   2   0   17.12    1.47
   9   2   0   12.23    1.55
  -9   2   0   16.05    1.38
   9   2   0   14.35    1.63
  -9   2   0   11.65    1.21
   9   2   0   12.13    1.44
  10   2   0   11.34    1.48
  10   2   0    8.55    1.43
 -10   2   0    7.05    1.05
 -10   2   0    9.85    1.08
  10   2   0    6.13    1.35
  10   2   0    9.95    1.19
 -11   2   0    0.40    0.93
  11   2   0    1.92    1.22
  11   2   0   -0.08    0.84
  12  -2   0    4.18    1.44
  12   2   0    3.94    1.33
  12   2   0    4.01    0.87
  13  -2   0    5.92    1.52
  13   2   0    3.54    1.29
  13   2   0    2.72    0.73
  14  -2   0   16.29    2.01
  14   2   0    9.12    1.49
  15  -2   0    3.96    1.29
  15   2   0    2.55    1.01
  16   2   0    0.58    1.03
   0   3   0    0.09    0.27
   0   3   0    0.29    0.77
  -1   3   0    0.76    0.31
   1   3   0    0.33    0.26
   1   3   0   -0.15    0.90
  -1   3   0    0.17    0.72
  -2   3   0   12.22    0.91
  -2   3   0   11.82    1.28
   2   3   0   10.95    1.58
  -3   3   0   26.52    2.04
  -3   3   0   28.10    1.76
   3   3   0   23.36    2.27
   3   3   0   23.19    1.87
  -4   3   0   83.55    5.79
   4   3   0   86.95    5.87
  -4   3   0   98.71    5.96
  -5   3   0   48.41    3.49
  -5   3   0   57.17    3.66
  -6   3   0   17.41    1.53
  -6   3   0   15.75    1.30
  -7   3   0    5.98    0.73
  -7   3   0    5.63    0.71
  -7   3   0    5.49    1.00
  -7   3   0    4.97    0.72
  -8   3   0    2.60    0.98
  -8   3   0    3.40    0.73
  -8   3   0    3.34    0.81
   8   3   0    2.73    1.02
  -8   3   0    3.19    0.61
  -8   3   0    3.05    0.66
  -9   3   0    0.15    0.79
  -9   3   0    0.14    0.64
  -9   3   0    0.47    0.93
   9   3   0    0.60    1.03
 -10   3   0   39.01    2.84
 -10   3   0   35.23    3.03
 -10   3   0   42.45    2.94
  10   3   0   44.95    3.21
 -11   3   0    3.27    0.84
  11   3   0    2.52    1.20
 -12   3   0   -0.66    0.70
  12   3   0    1.57    1.17
  13   3   0    0.25    1.09
 -13   3   0    1.55    0.70
  14  -3   0    0.10    1.09
 -14   3   0    1.31    0.59
  14   3   0    0.17    0.91
  15   3   0    0.46    0.69
   0   4   0   13.95    1.84
   0   4   0   14.15    1.03
  -1   4   0    5.15    1.23
   1   4   0    7.12    1.35
  -1   4   0    6.42    0.61
   2   4   0    3.55    1.23
  -2   4   0    4.17    0.49
  -2   4   0    4.88    0.51
  -2   4   0    3.59    1.05
  -3   4   0    7.82    0.70
  -3   4   0    6.81    0.65
   3   4   0    4.48    1.30
  -3   4   0    6.33    1.09
  -4   4   0   17.23    1.74
  -4   4   0   17.00    1.28
  -4   4   0   17.31    1.23
  -4   4   0   15.46    1.31
  -4   4   0   15.64    1.22
  -5   4   0   14.95    1.57
  -5   4   0   15.16    1.23
  -5   4   0   13.70    1.23
  -5   4   0   15.11    1.15
  -5   4   0   15.05    1.18
   5   4   0   12.62    1.55
  -6   4   0   13.80    1.22
  -6   4   0   13.24    1.54
   6   4   0   13.84    1.64
  -6   4   0   15.36    1.28
  -6   4   0   13.55    1.18
  -7   4   0   14.41    1.43
   7   4   0   15.81    1.88
  -7   4   0   18.84    1.52
  -7   4   0   21.42    1.87
  -8   4   0   27.22    2.01
   8   4   0   22.27    2.30
  -8   4   0   22.52    1.91
  -8   4   0   28.39    2.35
  -9   4   0   11.73    1.28
   9   4   0    9.90    1.54
  -9   4   0   12.81    1.20
 -10   4   0   13.45    1.35
  10   4   0   10.80    1.61
 -10   4   0   15.63    1.29
 -11   4   0   11.00    1.19
 -11   4   0   10.44    1.09
  11   4   0    7.93    1.36
  12   4   0    1.01    0.90
 -12   4   0    1.73    0.62
  13   4   0    0.55    0.69
 -13   4   0    1.74    0.51
   0   5   0   -0.25    1.32
   0   5   0   -0.09    0.48
  -1   5   0    4.20    1.43
   1   5   0    5.05    0.70
   1   5   0    6.15    1.99
  -1   5   0    5.54    0.67
   2   5   0    3.09    0.63
  -2   5   0    3.11    0.61
  -2   5   0    3.35    1.29
   3   5   0   19.30    1.60
  -3   5   0   22.18    1.60
  -3   5   0   19.81    2.18
   4   5   0   18.79    1.69
  -4   5   0   23.16    1.65
   5   5   0    6.54    0.96
  -6   5   0   10.32    1.09
   6   5   0    6.98    1.17
  -7   5   0    3.18    0.84
   7   5   0    2.97    1.02
   8   5   0    1.60    0.95
  -8   5   0    2.34    0.55
  -8   5   0    2.12    0.77
   9   5   0    1.01    0.84
  -9   5   0    1.01    0.74
  10   5   0   -0.42    0.67
 -10   5   0    0.95    0.67
 -11   5   0    0.60    0.64
  11   5   0    0.63    0.49
   0   6   0   11.09    1.01
   1   6   0    1.81    0.53
  -1   6   0    3.38    0.60
  -2   6   0   10.42    0.96
   2   6   0   10.03    0.92
  -3   6   0    8.71    0.92
  -4   6   0    5.26    0.75
  -5   6   0    9.73    1.01
  -6   6   0   11.38    1.12
  -7   6   0    4.40    0.70
  -8   6   0    4.16    0.65
  16   0  -1   -0.17    0.62
  15   0  -1   -0.10    1.16
  15   0  -1    1.86    0.85
  14   0  -1    1.60    1.12
  14   0  -1    0.42    1.56
  13   0  -1    1.95    1.62
  13   0  -1    6.13    1.33
  13   0  -1    4.19    1.28
  13   0  -1    3.81    1.39
  12   0  -1    0.96    1.09
  12   0  -1    1.52    1.22
  12   0  -1    0.96    1.52
  11   0  -1   29.50    2.25
  11   0  -1   25.77    2.21
  11   0  -1   21.70    2.50
  10   0  -1    9.63    1.24
   8   0  -1  190.18   12.20
   7   0  -1  254.52   15.10
  -7   0   1  216.46   15.13
  -6   0   1  199.08   13.49
   6   0  -1  221.51   13.46
  -5   0   1   32.07    2.36
   5   0  -1   36.16    2.33
  -4   0   1   16.03    1.21
   4   0  -1   15.61    1.18
   3   0  -1   22.96    1.62
  -3   0   1   24.88    1.62
  -2   0   1    0.70    0.31
   2   0  -1    0.70    0.33
  -1   0   1  173.29   10.87
   1   0  -1  168.69   10.87
  -1   0  -1  148.06    9.45
  -2   0  -1   73.95    4.38
   2   0   1   62.86    4.38
   3   0   1   87.17    5.78
  -3   0  -1   93.17    5.79
  -4   0  -1   52.28    3.37
   4   0   1   50.62    3.36
  -5   0  -1   -0.06    0.53
   5   0   1   -0.10    0.50
  -6   0  -1  115.58    8.33
   6   0   1  141.68    8.31
  -7   0  -1  144.47   10.65
   7   0   1  184.45   10.62
  -8   0  -1   83.35    6.10
   8   0   1   90.18    5.74
  10   0   1    4.90    1.12
  11   0   1    4.91    1.36
  11   0   1    3.32    1.66
  11   0   1    2.25    1.34
  11   0   1    4.36    1.20
  12   0   1    1.32    1.15
  12   0   1    1.48    1.72
  13   0   1   -1.96    1.09
  13   0   1    0.76    1.74
  14   0   1    1.52    1.57
  14   0   1   -0.64    0.99
  15   0   1    3.21    1.24
  15   0   1    2.72    0.92
  16   0   1    1.53    0.65
  16  -1  -1    1.84    1.00
  16  -1  -1    3.13    0.76
  16   1  -1    1.39    0.84
  15  -1  -1   -0.99    1.34
  15  -1  -1    0.10    0.98
  15   1  -1    0.86    0.66
  15   1  -1    0.60    0.98
  14  -1  -1    6.99    1.71
  14  -1  -1    1.56    1.14
  14   1  -1    2.70    1.21
  14   1  -1    1.76    0.86
  13  -1  -1    1.62    1.57
  13  -1  -1    1.46    1.13
  13   1  -1    1.57    0.95
  13   1  -1    1.13    1.21
  13   1  -1    0.70    1.25
  12  -1  -1    9.39    1.80
  12  -1  -1   12.86    1.42
  12   1  -1   11.26    1.59
  12   1  -1    9.23    1.35
  12   1  -1   12.63    1.66
  12   1  -1    8.79    1.74
  11  -1  -1   14.77    1.65
  11  -1  -1   16.76    2.00
  11   1  -1   18.25    1.75
  11   1  -1   17.31    2.17
  11   1  -1   15.67    1.69
  10   1  -1   41.92    2.86
  10   1  -1   34.52    3.58
  10   1  -1   35.14    2.80
  -9   1   1    3.39    0.94
  -8   1   1   21.76    1.89
   8   1  -1   23.66    1.93
  -7   1   1    6.64    0.86
   7   1  -1    6.26    0.84
   6  -1  -1    8.90    0.80
   6   1  -1    9.10    0.96
  -6   1   1    9.01    1.00
   5  -1  -1    1.60    0.40
   5   1  -1    0.91    0.61
  -5   1   1    1.35    0.52
   4  -1  -1    1.14    0.37
   4  -1  -1    1.54    0.36
  -4   1   1    1.21    0.43
   4   1  -1    0.42    0.58
   3  -1  -1  164.87   10.55
   3   1  -1  161.22   10.58
  -3   1   1  170.29   10.55
   2  -1  -1   45.27    2.95
   2   1  -1   39.95    2.99
  -2   1   1   47.58    2.95
   2   1  -1   50.38    3.15
  -1  -1   1   11.85    0.91
   1  -1  -1   12.16    0.86
   1   1  -1   13.19    0.96
   0  -1   1    2.01    0.37
   0   1  -1    1.20    0.19
   0   1   1    1.77    0.31
   0   1  -1    1.61    0.29
   1  -1   1  115.17    6.78
  -1   1  -1  102.92    6.77
   1   1   1  100.62    6.79
   2   1   1  333.43   20.62
  -2   1  -1  314.72   20.60
   3  -1   1  998.26   62.71
  -3  -1  -1 1000.00   62.74
   3   1   1  965.29   62.75
  -4  -1  -1  190.78   12.58
   4  -1   1  209.22   12.55
  -4   1  -1  181.93   12.59
   4   1   1  206.01   12.61
   5  -1   1   47.73    3.06
  -5  -1  -1   46.21    3.30
   5   1   1   45.65    3.14
  -5   1  -1   47.94    3.16
   6  -1   1   10.26    0.91
  -6   1  -1   12.27    1.17
   6   1   1   11.93    1.09
  -7   1  -1   74.90    4.70
   7   1   1   66.29    4.64
  -8   1  -1   66.52    4.50
  -9   1  -1   31.33    2.42
  10  -1   1    1.53    1.47
  10   1   1    3.07    1.54
  10   1   1    5.63    1.09
  10   1   1    1.92    1.17
  10   1   1    4.37    1.24
  11  -1   1    9.61    1.78
  11   1   1   10.24    1.32
  11   1   1    6.69    1.76
  11   1   1    8.53    1.48
  12  -1   1    0.71    1.53
  12   1   1    4.00    1.29
  12   1   1    4.84    1.09
  12   1   1    1.34    1.50
  13  -1   1    3.22    1.23
  13  -1   1    2.23    1.73
  13   1   1    0.25    1.34
  13   1   1    3.23    1.04
  13   1   1    1.61    1.22
  14  -1   1    2.01    1.12
  14  -1   1    0.76    1.66
  14   1   1    0.69    1.06
  14   1   1    0.49    0.82
  14   1   1    0.51    1.09
  15  -1   1    1.58    1.38
  15  -1   1    1.21    0.87
  15   1   1    0.70    0.94
  15   1   1    1.56    0.67
  16  -1   1    1.95    0.66
  16  -1   1    0.89    0.90
  16   1   1    0.83    0.47
  16  -2  -1    1.22    0.96
  16   2  -1    0.26    0.75
  15  -2  -1    3.54    0.94
  15  -2  -1    0.98    1.22
  15   2  -1    2.12    1.00
  14  -2  -1    0.93    1.31
  14   2  -1    1.02    1.14
  13  -2  -1    1.08    1.42
  13   2  -1    1.97    1.26
  13   2  -1    1.48    0.60
  12  -2  -1    9.38    1.64
  12   2  -1   12.51    1.69
  12   2  -1   11.49    1.19
  11  -2  -1   13.56    1.74
  11   2  -1   13.22    1.41
  11   2  -1   14.61    1.79
  11   2  -1   21.30    2.01
 -10   2   1   13.14    1.33
  10   2  -1   11.78    1.34
  10   2  -1    9.86    1.50
   9   2  -1   15.19    1.51
  -9   2   1   15.25    1.40
  -8   2   1   43.42    3.00
   7   2  -1  122.62    7.79
  -7   2   1  117.43    7.76
  -6   2   1  108.89    7.69
   6   2  -1  130.78    7.78
  -5   2   1   18.82    1.34
   5   2  -1   17.47    1.47
  -4   2   1   29.32    1.93
   4   2  -1   28.04    2.04
   3  -2  -1    8.93    0.74
   3   2  -1    8.56    0.90
   3   2  -1    8.27    1.19
  -3   2   1    9.40    0.73
   2  -2  -1   30.15    1.90
  -2   2   1   28.93    1.89
   2   2  -1   26.14    2.27
  -2   2   1   26.88    2.05
   2   2  -1   29.24    1.98
  -1   2   1   46.78    3.15
   1   2  -1   46.40    3.06
  -1   2   1   48.08    3.03
   1   2  -1   45.58    3.28
   0  -2   1   27.94    2.00
   0   2   1   31.59    1.91
   0   2  -1   26.92    2.14
   0   2   1   30.10    2.05
   0   2  -1   24.77    1.88
   0   2  -1   30.70    1.87
  -1   2  -1   40.52    2.57
  -1   2  -1   36.91    2.74
   1   2   1   39.75    2.78
   1   2   1   40.89    2.63
   2   2   1   32.99    2.33
  -2   2  -1   34.53    2.44
  -2   2  -1   35.25    2.27
   2   2   1   35.56    2.53
   3   2   1   28.86    2.13
  -3   2  -1   31.36    2.25
  -3   2  -1   34.39    2.08
   3   2   1   28.19    2.33
  -4   2  -1   32.55    2.10
  -4   2  -1   31.40    2.22
   4   2   1   27.52    2.15
  -5   2  -1    1.91    0.51
  -5   2  -1    3.59    0.74
   5   2   1    2.53    0.73
   6   2   1   17.09    1.50
  -6   2  -1   16.77    1.36
  -7   2  -1   47.04    3.24
   8   2   1   17.44    2.02
  -8   2  -1   19.15    1.62
   9   2   1   11.44    1.34
  -9   2  -1    6.77    1.17
   9   2   1    9.65    1.19
  -9   2  -1    7.97    1.03
   9   2   1    7.45    1.66
  -9   2  -1    7.20    1.01
  10   2   1    0.05    1.03
 -10   2  -1    1.08    0.79
  10   2   1    1.88    0.91
 -10   2  -1    0.98    0.95
  10   2   1    2.09    1.32
 -10   2  -1    0.64    0.79
 -11   2  -1    4.25    0.93
  11   2   1    4.28    1.31
  11   2   1    5.20    1.00
 -11   2  -1    3.47    1.30
  11   2   1    2.48    1.17
  12  -2   1    0.25    1.42
  12   2   1    1.93    0.81
  12   2   1   -0.07    1.24
 -12   2  -1   -0.71    0.79
  13  -2   1    2.80    1.48
 -13   2  -1    1.63    0.79
  13   2   1    1.42    0.71
  13   2   1    0.98    1.18
  14  -2   1    1.63    1.38
 -14   2  -1    0.50    0.66
  14   2   1    1.90    1.15
  14   2   1    0.64    0.51
  15  -2   1    1.49    1.19
  15   2   1   -0.10    0.89
 -15   2  -1    0.47    0.59
  15  -3  -1    0.67    0.96
  15   3  -1    0.16    0.71
  14  -3  -1    1.77    1.12
  14   3  -1    1.44    0.95
 -14   3   1    0.91    0.56
  13  -3  -1    5.61    1.40
 -13   3   1    3.99    0.78
  13   3  -1    3.90    1.17
  12   3  -1    7.86    1.40
 -12   3   1    8.19    0.99
  11   3  -1    3.77    1.27
 -11   3   1    4.32    0.82
 -10   3   1    8.58    1.47
  10   3  -1   14.21    1.58
 -10   3   1   13.38    1.19
   9   3  -1   15.48    1.67
  -9   3   1   13.99    1.48
  -9   3   1   13.43    1.19
  -9   3   1   14.64    1.42
  -9   3   1   13.30    1.67
  -9   3   1   12.92    1.22
  -8   3   1    0.28    0.69
  -8   3   1    0.38    0.49
   8   3  -1    1.02    0.94
  -8   3   1    0.73    0.54
  -8   3   1    0.83    0.55
  -8   3   1    1.35    0.96
  -7   3   1    3.16    0.58
  -7   3   1    2.55    0.92
  -7   3   1    2.98    0.56
  -6   3   1    3.90    0.84
  -6   3   1    4.48    0.58
   6   3  -1    3.39    0.80
   5   3  -1    8.52    1.10
  -5   3   1    9.91    1.15
  -5   3   1   11.59    0.89
   4   3  -1   16.68    1.45
  -4   3   1   19.23    1.53
  -4   3   1   17.39    1.27
   4   3  -1   16.86    1.44
  -3   3   1   83.24    5.03
  -3   3   1   82.82    5.21
   3   3  -1   73.12    5.09
   3   3  -1   78.27    5.29
   3   3  -1   70.50    5.40
   2   3  -1   77.96    5.85
  -2   3   1   89.98    5.51
  -2   3   1   87.29    5.70
   1   3  -1   28.94    2.46
   1   3  -1   29.45    1.96
  -1   3   1   30.53    1.99
  -1   3   1   30.72    2.27
   0   3  -1   36.66    2.29
   0   3   1   33.29    2.63
   0   3   1   34.38    2.31
  -1   3  -1    2.96    0.38
   1   3   1    2.28    0.39
  -1   3  -1    1.80    0.81
   1   3   1    2.69    0.92
   2   3   1   12.07    1.54
  -2   3  -1   12.80    1.00
  -2   3  -1   14.73    1.40
  -3   3  -1   69.58    4.85
   3   3   1   66.64    4.94
   3   3   1   73.37    4.72
  -3   3  -1   76.33    4.66
  -4   3  -1   20.52    1.64
   4   3   1   16.06    1.46
  -4   3  -1   18.29    1.36
  -5   3  -1    8.91    0.88
  -5   3  -1    7.03    0.96
  -6   3  -1    9.50    1.04
  -6   3  -1   10.78    1.27
  -6   3  -1   12.29    1.03
  -6   3  -1   12.92    1.10
  -7   3  -1   14.67    1.45
  -7   3  -1   14.05    1.26
  -7   3  -1   11.99    1.47
  -7   3  -1   13.88    1.23
   7   3   1   12.78    1.24
  -8   3  -1   19.62    1.58
  -8   3  -1   21.45    1.71
  -8   3  -1   20.13    1.65
  -8   3  -1   18.94    1.81
   8   3   1   19.20    1.57
   8   3   1   16.71    1.86
  -9   3  -1    6.19    1.14
  -9   3  -1    8.31    1.10
   9   3   1    7.63    0.88
   9   3   1    6.78    1.34
  -9   3  -1    9.32    1.05
 -10   3  -1    0.01    0.89
  10   3   1    0.50    0.48
  10   3   1    0.98    1.17
 -10   3  -1    0.48    0.76
 -10   3  -1    1.10    0.86
 -11   3  -1   18.45    1.63
  11   3   1   18.99    2.13
  12   3   1    9.42    1.55
 -12   3  -1   10.36    1.18
 -13   3  -1    3.95    0.77
  13   3   1    5.32    1.24
  14  -3   1    1.28    1.13
  14   3   1    3.65    0.96
  13   4  -1    2.65    0.76
  12   4  -1    1.56    0.92
 -12   4   1    2.27    0.64
  11   4  -1    6.96    1.31
 -11   4   1   12.38    1.07
 -10   4   1    5.52    0.86
  10   4  -1    6.16    1.30
 -10   4   1    5.56    0.94
   9   4  -1    6.96    1.41
  -9   4   1    9.03    1.09
  -9   4   1   10.60    1.08
  -8   4   1    1.77    0.74
  -8   4   1    0.72    0.59
  -8   4   1    0.89    0.96
   8   4  -1    1.71    1.14
  -7   4   1   29.97    2.18
  -7   4   1   32.10    2.55
  -7   4   1   30.62    2.14
   7   4  -1   27.54    2.52
  -7   4   1   30.86    2.26
  -6   4   1   14.98    1.22
  -6   4   1   13.77    1.56
  -6   4   1   14.14    1.17
  -6   4   1   14.49    1.25
  -5   4   1    9.48    0.92
  -5   4   1    8.88    1.00
  -5   4   1    8.53    1.29
  -5   4   1   11.08    0.88
  -4   4   1   14.41    1.05
  -4   4   1   12.48    1.15
  -4   4   1   13.82    1.50
  -4   4   1   12.93    1.09
  -3   4   1   11.02    1.46
   3   4  -1    9.41    1.55
  -3   4   1   10.58    0.89
  -3   4   1   10.52    0.84
  -2   4   1   33.38    2.17
   2   4  -1   30.39    2.84
  -2   4   1   32.18    2.66
  -2   4   1   31.73    2.13
  -1   4   1   23.98    2.25
   1   4  -1   24.15    2.37
  -1   4   1   24.56    1.67
   0   4   1   54.39    3.51
   0   4  -1   52.14    4.06
   0   4   1   54.43    4.00
   1   4   1   23.77    1.69
  -1   4  -1   28.48    1.75
   1   4   1   22.34    2.29
  -1   4  -1   23.36    2.34
  -2   4  -1    4.22    1.16
  -2   4  -1    4.77    0.55
   2   4   1    3.80    1.27
   2   4   1    5.27    0.65
  -3   4  -1   23.34    1.80
  -3   4  -1   26.06    1.85
  -3   4  -1   33.85    2.39
  -4   4  -1   14.69    1.23
  -4   4  -1   15.27    1.25
  -4   4  -1   16.62    1.69
  -4   4  -1   15.24    1.19
   4   4   1   14.05    1.50
  -5   4  -1    1.77    0.96
   5   4   1    0.47    0.94
  -5   4  -1    2.43    0.58
  -5   4  -1    2.22    0.62
  -5   4  -1    2.12    0.62
   6   4   1    2.13    1.07
  -6   4  -1    3.25    0.95
  -6   4  -1    2.40    0.65
  -6   4  -1    3.03    0.92
  -6   4  -1    3.16    0.71
  -7   4  -1   18.16    1.74
  -7   4  -1   13.57    1.33
  -7   4  -1   15.45    1.40
   7   4   1   12.51    1.65
  -8   4  -1   10.21    1.13
  -8   4  -1   11.71    1.24
   8   4   1   11.50    1.53
  -9   4  -1    5.39    0.87
  -9   4  -1    4.79    0.91
   9   4   1    3.63    1.24
 -10   4  -1    1.60    0.77
  10   4   1    0.97    1.14
 -10   4  -1    1.76    0.74
  11   4   1    0.31    1.01
 -11   4  -1    1.16    0.66
 -11   4  -1    2.40    0.79
 -12   4  -1    0.82    0.56
  12   4   1    2.13    0.89
  13   4   1   -0.20    0.65
 -13   4  -1    0.47    0.45
 -11   5   1    5.91    0.85
 -10   5   1    5.03    0.80
 -10   5   1    3.68    0.56
  10   5  -1    1.59    0.69
   9   5  -1    0.40    0.77
  -9   5   1    0.25    0.73
  -9   5   1    0.72    0.54
  -8   5   1    5.52    0.94
  -8   5   1    7.90    0.80
   8   5  -1    2.17    1.05
  -7   5   1    1.92    0.61
  -7   5   1    0.04    0.73
  -6   5   1    2.22    0.77
  -6   5   1    3.61    0.60
  -5   5   1    8.07    0.73
  -5   5   1    6.97    0.93
  -4   5   1    7.89    0.95
  -3   5   1   12.34    1.80
  -3   5   1   12.86    1.17
  -2   5   1   23.32    1.63
  -2   5   1   20.78    2.39
   2   5  -1   15.82    2.38
   1   5  -1   12.63    1.23
   1   5  -1   12.47    1.97
  -1   5   1   11.49    1.10
  -1   5   1   12.36    1.81
   0   5   1    4.41    0.69
   0   5  -1    4.35    1.45
   0   5  -1    3.85    0.58
   1   5   1   12.00    1.10
  -1   5  -1   10.86    1.00
  -1   5  -1   10.99    1.73
  -2   5  -1    0.87    0.51
   2   5   1    0.72    0.58
  -2   5  -1    0.50    1.16
   3   5   1    3.19    0.74
  -3   5  -1    3.48    1.23
  -3   5  -1    3.91    0.65
   4   5   1    1.91    0.72
  -4   5  -1    2.43    0.66
  -5   5  -1    3.70    0.77
   5   5   1    3.02    0.86
  -6   5  -1    7.23    0.97
   6   5   1    6.81    1.13
  -7   5  -1    3.07    0.78
   7   5   1   -0.19    0.98
  -8   5  -1    1.89    0.76
   8   5   1    1.11    0.94
  -9   5  -1    3.05    0.77
   9   5   1    1.95    0.86
  10   5   1    3.99    0.83
 -10   5  -1    6.80    0.87
  11   5   1    4.29    0.63
  -8   6   1   -0.31    0.53
  -7   6   1    3.67    0.68
  -6   6   1    1.82    0.63
  -5   6   1    2.55    0.65
  -4   6   1    4.78    0.75
  -3   6   1    8.05    0.91
  -2   6   1    4.56    0.68
   1   6  -1    2.29    0.76
  -1   6   1    1.08    0.52
   0   6  -1    6.92    0.74
   0   6   1    6.54    0.76
  -1   6  -1   19.37    1.43
   1   6   1   17.72    1.41
  -2   6  -1   12.45    1.07
   2   6   1   10.68    1.01
   3   6   1    7.90    0.88
  -3   6  -1    9.30    0.92
   4   6   1   10.38    1.04
  -4   6  -1   13.79    1.14
  -5   6  -1    7.67    0.85
   5   6   1    3.98    0.64
  -6   6  -1    0.66    0.58
   6   6   1    1.65    0.49
  -7   6  -1    5.36    0.73
  -8   6  -1    2.75    0.59
  16   0  -2    0.59    0.65
  14   0  -2   47.44    3.50
  14   0  -2   49.00    3.88
  14   0  -2   48.04    3.53
  13   0  -2   36.73    3.15
  13   0  -2   34.31    2.75
  13   0  -2   32.47    2.76
  12   0  -2   36.00    2.89
  12   0  -2   37.96    3.27
  12   0  -2   37.50    2.85
  11   0  -2   21.65    2.20
  11   0  -2   18.41    1.83
  11   0  -2   20.06    1.81
  10   0  -2    0.08    0.78
   8   0  -2    0.13    0.56
   7   0  -2    6.12    0.74
   6   0  -2    0.54    0.53
  -6   0   2    0.54    0.61
   5   0  -2    1.54    0.54
  -5   0   2    2.37    0.56
   4   0  -2    1.12    0.50
  -4   0   2    1.34    0.48
  -3   0   2   61.38    3.81
   3   0  -2   58.90    3.83
   3   0  -2   56.59    3.80
  -2   0   2   34.29    2.33
   2   0  -2   36.69    2.35
   1   0  -2    2.31    0.31
  -1   0   2    2.34    0.35
  -1   0  -2   10.76    0.82
  -2   0  -2    3.39    0.48
  -3   0  -2   50.04    3.26
   3   0   2   49.21    3.24
   4   0   2    4.09    0.59
  -4   0  -2    3.87    0.58
   5   0   2    0.18    0.49
  -5   0  -2   -0.30    0.57
  -6   0  -2   11.30    1.24
   6   0   2   14.06    1.12
  -7   0  -2   -0.18    0.70
   7   0   2    0.95    0.57
   8   0   2   28.52    1.99
  -8   0  -2   25.43    2.13
  10   0   2   12.72    1.61
  10   0   2   15.66    2.11
  11   0   2   66.47    4.63
  11   0   2   62.82    5.05
  12   0   2   38.48    3.71
  12   0   2   39.80    3.10
  13   0   2   -0.13    1.77
  13   0   2    1.57    1.13
  14   0   2    0.44    1.46
  14   0   2   -1.01    0.93
  15   0   2    0.24    0.78
  15   0   2    0.50    1.17
  16   0   2   -0.28    0.73
  16   0   2    0.43    0.58
  16  -1  -2    0.91    0.73
  16  -1  -2    0.41    1.00
  16   1  -2    1.41    0.83
  15  -1  -2    0.65    0.97
  15  -1  -2    1.23    1.35
  15   1  -2    0.31    0.99
  15   1  -2    0.78    0.63
  14  -1  -2    2.30    1.49
  14  -1  -2    3.26    1.11
  14   1  -2    2.09    0.84
  14   1  -2    1.23    1.13
  13  -1  -2    8.40    1.18
  13  -1  -2    7.55    1.76
  13   1  -2    3.82    1.37
  13   1  -2    8.71    1.53
  13   1  -2    3.53    1.30
  13   1  -2    4.25    1.07
  12  -1  -2    4.10    1.05
  12  -1  -2    2.29    1.38
  12   1  -2    3.77    1.22
  12   1  -2    1.95    1.38
  12   1  -2    4.67    1.09
  11  -1  -2    2.12    1.22
  11  -1  -2    1.34    0.82
  11   1  -2    2.54    1.02
  11   1  -2    2.65    1.07
  11   1  -2    2.52    1.44
  10  -1  -2   20.30    1.75
  10   1  -2   21.23    1.82
  10   1  -2   21.19    1.82
  -8   1   2   12.15    1.32
   8   1  -2   14.71    1.49
  -7   1   2   32.72    2.37
   7   1  -2   34.49    2.39
   6  -1  -2   48.76    3.11
  -6   1   2   47.21    3.13
   6   1  -2   43.78    3.15
   5  -1  -2  116.50    7.26
   5  -1  -2  114.48    7.27
   5   1  -2  113.08    7.33
  -5   1   2  109.49    7.29
   4  -1  -2  524.56   30.09
   4  -1  -2  457.92   30.10
  -4   1   2  467.06   30.11
   4   1  -2  444.10   30.13
   3  -1  -2  300.52   19.16
  -3   1   2  314.21   19.16
  -3   1   2  296.31   19.14
   3   1  -2  293.64   19.19
   2  -1  -2  112.71    7.18
  -2   1   2  114.14    7.17
  -2   1   2  107.42    7.15
   2   1  -2  120.07    7.33
   2   1  -2  108.35    7.21
   1  -1  -2  188.67   11.63
   1   1  -2  203.85   11.73
   1   1  -2  156.04   11.63
   0  -1   2    7.14    0.67
   0  -1  -2    7.85    0.59
   0   1   2    6.45    0.58
   0   1  -2    4.89    0.47
   0   1  -2    7.31    1.03
  -1  -1  -2  424.04   25.11
  -1   1  -2  373.89   25.14
  -1   1  -2  384.47   25.09
   1   1   2  397.99   25.11
  -2  -1  -2  183.59   11.53
  -2   1  -2  174.62   11.57
   2   1   2  186.84   11.55
  -2   1  -2  178.54   11.53
  -3  -1  -2  157.29   10.35
   3  -1   2  165.93   10.32
   3   1   2  162.27   10.36
   4  -1   2   95.33    5.99
  -4  -1  -2   92.93    6.04
   4   1   2   89.07    6.05
  -4   1  -2   96.63    6.05
  -5  -1  -2   55.49    3.73
   5  -1   2   57.84    3.68
  -5   1  -2   54.90    3.77
   5   1   2   57.66    3.75
   6  -1   2   10.79    0.93
  -6   1  -2   11.38    1.14
   6   1   2   11.60    1.05
   7   1   2    9.63    0.98
  -7   1  -2    8.71    1.00
  -8   1  -2    5.94    0.97
   9   1   2   15.28    1.61
  -9   1  -2   15.22    1.63
  10  -1   2   17.04    2.23
 -10   1  -2   18.69    1.94
  10   1   2   20.00    2.52
  10   1   2   25.52    2.15
  10   1   2   21.01    1.91
  11  -1   2   26.85    2.81
  11   1   2   25.19    2.42
  11   1   2   25.59    2.81
  11   1   2   28.07    2.33
  12  -1   2    9.92    2.00
  12   1   2   10.83    1.38
  12   1   2   10.14    1.53
  12   1   2    7.68    1.77
  13  -1   2    0.93    1.71
  13   1   2    0.51    1.37
  13   1   2    1.47    1.17
  13   1   2    0.53    0.94
  14  -1   2    7.58    1.21
  14  -1   2    7.33    1.78
  14   1   2    6.30    1.24
  14   1   2    4.85    1.28
  14   1   2    5.40    1.02
  15  -1   2    5.93    1.44
  15  -1   2    5.49    0.94
  15   1   2    5.45    0.81
  16  -1   2    1.06    0.84
  16  -2  -2    1.34    1.00
  16   2  -2    0.99    0.76
  15  -2  -2   10.39    1.15
  15  -2  -2    5.90    1.36
  15   2  -2    3.11    1.08
  14  -2  -2   25.52    2.49
  13  -2  -2   12.79    1.72
  13   2  -2    8.00    1.50
  12  -2  -2    3.46    1.29
  12   2  -2    1.83    1.35
  12   2  -2    2.38    0.72
  12   2  -2    3.67    1.36
  11  -2  -2    3.96    1.19
  11   2  -2    2.48    0.78
  11   2  -2    2.79    1.22
  10  -2  -2    6.20    1.15
  10   2  -2    8.94    1.27
  10   2  -2    8.51    1.04
 -10   2   2    7.44    0.97
  -9   2   2   17.01    1.37
   9   2  -2   14.08    1.47
   8   2  -2    5.03    0.81
  -8   2   2    6.80    0.77
  -7   2   2   12.32    1.04
   7   2  -2   11.40    1.11
  -6   2   2   19.20    1.42
   6   2  -2   20.13    1.60
   5  -2  -2   17.84    1.30
  -5   2   2   19.38    1.32
   5   2  -2   17.33    1.46
   4  -2  -2   15.11    1.10
  -4   2   2   14.59    1.09
   4   2  -2   14.58    1.24
   3  -2  -2   14.85    1.05
  -3   2   2   13.61    1.01
   3   2  -2   14.63    1.20
   3   2  -2   13.36    1.60
   2  -2  -2    5.09    0.57
  -2   2   2    6.17    0.54
  -2   2   2    6.76    0.78
   2   2  -2    5.43    0.66
   2   2  -2    5.53    1.06
   1  -2  -2   27.61    1.86
  -1   2   2   28.98    1.88
   1   2  -2   28.30    2.21
  -1   2   2   30.56    2.01
   1   2  -2   25.52    1.88
   0   2   2  142.31    9.17
   0   2   2  155.21    9.09
   0   2  -2  141.91    9.07
   0   2  -2  129.36    9.24
  -1   2  -2  164.20   10.82
   1   2   2  168.96   10.71
  -1   2  -2  160.68   10.68
   1   2   2  177.36   10.80
   2   2   2   28.54    2.03
  -2   2  -2   26.01    2.01
   2   2   2   25.82    1.84
  -2   2  -2   26.94    1.80
  -3   2  -2   16.52    1.38
  -3   2  -2   14.81    1.14
   3   2   2   13.55    1.19
  -4   2  -2   35.74    2.50
  -4   2  -2   42.30    2.65
   4   2   2   33.07    2.51
  -5   2  -2    4.09    0.82
   5   2   2    2.83    0.68
  -5   2  -2    3.78    0.61
   6   2   2   73.27    4.80
  -6   2  -2   64.19    4.77
  -6   2  -2   78.66    4.89
  -7   2  -2   13.85    1.50
  -7   2  -2   16.93    1.43
  -8   2  -2    4.31    0.99
  -8   2  -2    5.94    0.89
   8   2   2    6.03    1.00
  -9   2  -2   10.14    1.38
   9   2   2    7.63    1.11
  -9   2  -2    6.38    1.04
   9   2   2    7.46    1.28
   9   2   2    7.14    1.64
  -9   2  -2    7.38    1.02
  -9   2  -2    6.45    1.10
  10   2   2    7.78    1.38
 -10   2  -2    7.25    1.47
  10   2   2    9.25    1.18
 -10   2  -2    6.71    1.11
  10   2   2    5.90    1.57
 -10   2  -2    8.52    1.17
  11   2   2   42.51    3.15
  11   2   2   39.40    3.37
 -11   2  -2   44.17    3.17
  11   2   2   48.27    3.44
  12  -2   2   15.43    2.46
  12   2   2   12.19    1.26
 -12   2  -2    8.31    1.19
  12   2   2   11.96    1.59
  12   2   2    6.71    1.27
  13  -2   2    1.11    1.48
  13   2   2   -0.78    1.13
 -13   2  -2    0.51    0.80
  13   2   2    1.11    0.71
  14  -2   2    3.83    1.48
  14   2   2    0.92    1.07
 -14   2  -2    2.80    0.74
  14   2   2    1.65    0.56
  15  -2   2    2.48    1.13
 -15   2  -2    1.23    0.57
  15   2   2    1.87    0.84
  15  -3  -2    0.85    0.96
  15   3  -2    0.50    0.71
  14  -3  -2   -0.03    1.06
  14   3  -2    0.11    0.90
 -14   3   2   -0.08    0.56
  13  -3  -2   -0.48    1.11
  13   3  -2    1.69    1.07
 -13   3   2    1.74    0.69
  12   3  -2    2.90    1.20
 -12   3   2    5.13    0.83
 -11   3   2    8.55    0.98
  11   3  -2    7.72    1.37
 -10   3   2   24.24    1.74
 -10   3   2   18.10    2.16
  10   3  -2   28.50    2.21
 -10   3   2   24.07    1.77
  -9   3   2   23.83    1.79
  -9   3   2   23.91    1.79
  -9   3   2   28.93    1.95
   9   3  -2   20.70    2.08
   9   3  -2   23.36    2.13
   8   3  -2   11.94    1.38
  -8   3   2   10.30    1.58
  -8   3   2   13.86    1.13
  -8   3   2   12.66    1.26
   8   3  -2   12.62    1.46
  -8   3   2   13.19    1.08
   7   3  -2   11.17    1.32
  -7   3   2   13.65    1.10
  -7   3   2   12.88    1.46
  -7   3   2   13.91    1.07
  -6   3   2    8.83    1.25
   6   3  -2   10.46    1.13
  -6   3   2   11.75    0.91
   5   3  -2    5.20    0.74
  -5   3   2    6.20    0.89
  -5   3   2    4.43    0.53
   4   3  -2   70.29    5.23
  -4   3   2   79.48    5.17
  -4   3   2   92.11    5.35
   4   3  -2   78.30    5.25
   3   3  -2   25.65    1.84
  -3   3   2   27.36    1.97
   3   3  -2   22.17    1.81
   3   3  -2   25.10    2.34
  -3   3   2   26.16    1.72
  -2   3   2   49.29    3.11
   2   3  -2   39.32    3.33
  -2   3   2   41.50    2.86
  -1   3   2   12.72    1.30
   1   3  -2   11.19    1.58
  -1   3   2   12.93    0.96
   0   3   2   12.88    1.36
   0   3   2   12.35    0.96
   0   3  -2   12.24    1.42
   0   3  -2   12.00    0.88
  -1   3  -2    4.77    0.54
   1   3   2    5.70    0.97
  -1   3  -2    3.74    0.95
  -2   3  -2   35.70    2.24
  -2   3  -2   32.62    2.58
   2   3   2   30.71    2.60
  -3   3  -2   31.96    2.49
  -3   3  -2   31.79    2.15
   3   3   2   30.45    2.37
  -4   3  -2   22.63    1.60
  -4   3  -2   22.65    1.88
   4   3   2   19.70    1.64
  -5   3  -2   36.14    2.51
  -5   3  -2   35.89    2.71
  -6   3  -2   20.75    1.70
  -6   3  -2   25.02    1.79
  -6   3  -2   23.97    1.96
   6   3   2   21.64    1.78
   7   3   2   33.32    2.68
  -7   3  -2   33.95    2.41
  -7   3  -2   34.78    2.45
  -7   3  -2   34.64    2.61
   7   3   2   31.34    2.45
  -7   3  -2   32.70    2.50
  -8   3  -2   14.00    1.45
  -8   3  -2   18.38    1.73
  -8   3  -2   17.21    1.59
   8   3   2   16.41    1.87
  -8   3  -2   16.98    1.50
   8   3   2   15.60    1.53
  -9   3  -2   11.52    1.58
  -9   3  -2   13.49    1.30
   9   3   2    9.86    1.59
   9   3   2   11.78    1.25
  -9   3  -2   13.08    1.43
  10   3   2    5.88    1.38
  10   3   2    6.08    0.83
 -10   3  -2    4.56    1.07
 -10   3  -2    5.69    1.03
 -11   3  -2    9.07    1.10
  11   3   2    5.69    0.70
  11   3   2    8.74    1.51
  12   3   2    0.03    1.18
 -12   3  -2    0.42    0.73
 -13   3  -2    0.30    0.63
  13   3   2    1.25    1.06
 -14   3  -2    1.93    0.58
  14   3   2    0.85    0.85
 -13   4   2    0.85    0.53
  13   4  -2   -0.17    0.69
 -12   4   2    0.59    0.60
  12   4  -2    1.13    0.88
  11   4  -2    3.24    1.11
 -11   4   2    5.42    0.79
 -10   4   2   10.08    1.23
  10   4  -2    9.64    1.48
 -10   4   2   12.92    1.13
  -9   4   2    1.08    0.77
  -9   4   2    1.67    0.62
   9   4  -2    0.06    1.11
  -8   4   2   24.20    1.70
  -8   4   2   20.04    2.18
   8   4  -2   18.84    2.14
  -8   4   2   25.74    1.68
  -8   4   2   20.49    1.80
  -7   4   2   17.12    1.33
  -7   4   2   15.53    1.43
  -7   4   2   18.16    1.82
  -6   4   2   30.89    2.26
  -6   4   2   30.76    2.22
  -6   4   2   34.53    2.60
  -6   4   2   33.42    2.31
  -5   4   2   21.18    1.51
  -5   4   2   19.44    1.53
  -5   4   2   21.33    1.62
  -5   4   2   21.98    1.91
  -4   4   2    3.98    0.51
  -4   4   2    3.89    0.62
  -4   4   2    4.71    0.93
  -4   4   2    3.22    0.52
   3   4  -2   17.30    2.33
  -3   4   2   25.31    1.80
  -3   4   2   24.12    2.14
  -3   4   2   24.86    1.62
  -3   4   2   22.27    1.63
   2   4  -2    5.55    1.39
  -2   4   2    7.24    0.63
  -2   4   2    5.99    0.67
  -2   4   2    7.79    1.20
  -1   4   2    0.47    0.95
  -1   4   2    0.35    0.36
   1   4  -2    1.41    1.15
  -1   4   2    0.13    0.31
   0   4   2   25.39    1.72
   0   4   2   26.85    2.35
   0   4   2   24.67    1.76
   0   4  -2   28.42    2.50
  -1   4  -2   38.74    3.08
   1   4   2   39.16    2.48
   1   4   2   35.21    2.44
   2   4   2   13.29    1.02
  -2   4  -2   13.68    1.71
   2   4   2   11.84    0.91
  -2   4  -2   17.24    1.28
  -3   4  -2    0.75    0.97
  -3   4  -2    1.86    0.51
   3   4   2    0.02    0.42
  -3   4  -2    1.25    0.49
   3   4   2    2.41    0.88
  -4   4  -2    8.22    0.88
  -4   4  -2    7.53    1.19
  -4   4  -2    9.01    0.91
   4   4   2    6.77    1.07
  -4   4  -2    7.08    0.81
  -5   4  -2    0.62    0.63
  -5   4  -2    0.89    0.86
  -5   4  -2    0.90    0.57
  -5   4  -2    1.65    0.68
   5   4   2   -0.19    0.89
  -6   4  -2    4.94    0.76
   6   4   2    1.62    1.05
  -6   4  -2    5.15    0.84
  -6   4  -2    4.01    1.01
   7   4   2    0.33    1.07
  -7   4  -2    0.44    0.67
  -7   4  -2    0.25    0.74
  -7   4  -2    0.75    0.92
  -8   4  -2    1.25    0.74
   8   4   2    0.61    1.10
  -8   4  -2    2.03    0.83
  -9   4  -2    1.84    0.82
  -9   4  -2    1.44    0.73
   9   4   2    1.34    1.13
 -10   4  -2    1.08    0.69
 -10   4  -2   -0.51    0.75
  10   4   2    0.42    1.07
 -11   4  -2    2.43    0.80
 -11   4  -2    1.41    0.62
  11   4   2    1.82    0.99
 -12   4  -2    0.97    0.53
  12   4   2    1.16    0.82
 -13   4  -2    1.07    0.53
  13   4   2    0.50    0.59
  -9   5   2   30.97    2.24
  -9   5   2   33.66    2.40
  -8   5   2   17.80    1.69
  -8   5   2   21.64    1.53
  -7   5   2   11.51    1.19
  -7   5   2    8.32    0.94
  -6   5   2    7.85    1.00
  -6   5   2    7.66    0.84
  -5   5   2    0.98    0.65
  -5   5   2    0.98    0.48
  -4   5   2    8.87    0.99
  -4   5   2    8.84    0.78
  -3   5   2    3.98    0.72
  -3   5   2    3.00    1.30
  -2   5   2    6.65    0.83
  -2   5   2    7.60    1.76
  -1   5   2    4.41    0.73
   1   5  -2    4.19    1.57
   0   5  -2   10.73    1.76
   0   5   2   10.44    1.07
  -1   5  -2    4.71    1.45
   1   5   2    5.69    0.78
  -1   5  -2    5.20    0.68
  -2   5  -2    2.74    0.59
  -2   5  -2    3.43    1.25
   2   5   2    2.93    0.69
  -3   5  -2   10.43    1.03
  -3   5  -2   12.37    2.44
   3   5   2   10.69    1.18
  -4   5  -2   27.62    2.04
   4   5   2   26.88    2.11
  -5   5  -2   27.64    2.02
   5   5   2   24.99    2.13
   6   5   2   27.01    2.30
  -6   5  -2   28.02    2.11
  -7   5  -2   18.57    1.53
   7   5   2   14.43    1.68
  -8   5  -2    8.06    0.99
   8   5   2    5.18    1.07
  -9   5  -2    1.80    0.73
   9   5   2    1.96    0.85
 -10   5  -2    1.81    0.69
  10   5   2    1.27    0.66
 -11   5  -2    0.79    0.67
  11   5   2    0.54    0.45
  -8   6   2    5.16    0.72
  -7   6   2   10.49    1.03
  -6   6   2    9.13    0.97
  -5   6   2    4.56    0.73
  -4   6   2    4.88    0.72
  -3   6   2    4.77    0.69
  -2   6   2    0.92    0.54
  -1   6   2    0.64    0.50
   0   6   2    5.50    0.69
   1   6   2   12.10    1.04
  -1   6  -2   11.17    1.04
  -2   6  -2    3.39    0.68
   2   6   2    3.97    0.62
   3   6   2    0.79    0.52
  -3   6  -2    1.63    0.61
  -4   6  -2    0.14    0.60
   4   6   2    0.59    0.55
   5   6   2    0.74    0.54
  -5   6  -2    1.50    0.62
  -6   6  -2    1.92    0.62
   6   6   2    0.57    0.49
  -7   6  -2    1.11    0.56
   7   6   2   -0.37    0.40
  16   0  -3   -0.52    0.61
  15   0  -3   -0.20    0.96
  15   0  -3    0.34    0.90
  15   0  -3   -0.38    1.10
  14   0  -3    2.71    1.53
  14   0  -3    2.68    1.21
  14   0  -3    3.74    1.15
  14   0  -3    2.57    1.35
  13   0  -3    0.10    1.45
  13   0  -3    0.73    1.09
  13   0  -3    1.88    1.07
  12   0  -3    2.33    1.05
  12   0  -3    1.47    1.44
  12   0  -3    2.50    1.02
  11   0  -3   -0.62    0.93
  11   0  -3    0.69    0.87
  11   0  -3    0.05    1.13
  10   0  -3   13.51    1.33
   8   0  -3    0.69    0.54
   7   0  -3   71.82    4.69
  -6   0   3  132.18    9.00
   6   0  -3  145.13    8.93
   5   0  -3   43.71    2.78
   5   0  -3   43.06    2.83
  -5   0   3   40.65    2.84
   4   0  -3    3.96    0.59
  -4   0   3    3.37    0.49
   4   0  -3    2.70    0.40
   3   0  -3   96.88    5.99
   3   0  -3   91.26    5.96
  -3   0   3   91.25    5.96
   2   0  -3  102.63    6.29
  -2   0   3   94.39    6.29
   1   0  -3   -0.36    0.23
  -1   0  -3  176.57   11.26
  -2   0  -3  531.25   33.77
   3   0   3   40.93    2.71
  -3   0  -3   40.75    2.73
  -4   0  -3  180.10   11.54
   4   0   3  180.59   11.53
  -5   0  -3  240.80   15.36
   5   0   3  239.81   15.33
  -6   0  -3   22.43    1.78
   6   0   3   24.65    1.72
  -7   0  -3    1.67    0.68
   7   0   3   -0.19    0.55
  -8   0  -3    2.10    0.81
  10   0   3    2.67    1.65
  10   0   3    2.80    1.12
  11   0   3    9.46    2.07
  11   0   3    8.36    1.42
  12   0   3   -1.97    1.69
  12   0   3   -1.25    1.02
  13   0   3    1.12    1.79
  13   0   3    2.41    1.05
  14   0   3    6.41    1.18
  14   0   3    7.42    1.66
  15   0   3    6.07    1.29
  15   0   3    4.62    0.90
  16   0   3    1.25    0.62
  16  -1  -3    1.53    1.05
  16  -1  -3    3.02    0.80
  16   1  -3    0.12    0.80
  15  -1  -3    4.56    1.05
  15  -1  -3    0.18    1.23
  15   1  -3    2.84    1.06
  15   1  -3    2.01    0.64
  14  -1  -3    3.69    1.10
  14  -1  -3    0.94    1.37
  14   1  -3    3.60    1.35
  14   1  -3    2.40    1.26
  14   1  -3    2.41    0.84
  13  -1  -3    7.38    1.17
  13  -1  -3    7.87    1.68
  13   1  -3    6.94    1.38
  13   1  -3    4.45    1.09
  12  -1  -3   41.23    2.85
  12  -1  -3   38.19    3.11
  12   1  -3   40.60    2.88
  12   1  -3   39.33    2.91
  12   1  -3   29.56    3.02
  11  -1  -3   65.88    4.53
  11   1  -3   62.87    4.34
  11   1  -3   66.64    4.36
  11   1  -3   55.72    4.54
  10  -1  -3   63.89    4.31
  10  -1  -3   64.49    4.79
  10   1  -3   66.50    4.34
  10   1  -3   60.34    4.34
  -8   1   3   48.68    3.32
   7   1  -3   23.17    1.76
  -7   1   3   23.25    1.74
   6  -1  -3   43.10    2.81
  -6   1   3   41.16    2.84
   6   1  -3   43.18    2.89
   5  -1  -3  145.38    9.25
   5   1  -3  152.77    9.30
  -5   1   3  136.09    9.26
   4  -1  -3   50.15    3.34
  -4   1   3   52.94    3.34
   4   1  -3   50.69    3.40
   3  -1  -3   19.86    1.36
  -3   1   3   21.67    1.36
   3   1  -3   19.52    1.48
   3   1  -3   18.27    1.31
   2  -1  -3   20.91    1.44
  -2   1   3   22.84    1.43
   2   1  -3   18.80    1.50
   1  -1  -3   24.75    1.73
   1   1  -3   25.95    2.00
   0  -1  -3  100.24    6.42
   0   1  -3  103.45    6.39
   0   1  -3   96.58    6.51
  -1  -1  -3   12.17    0.97
  -1   1  -3   12.99    0.93
  -1   1  -3   11.33    1.11
   1   1   3   12.40    1.00
  -2  -1  -3   40.54    2.61
   2   1   3   40.24    2.63
  -2   1  -3   36.28    2.66
  -2   1  -3   40.64    2.59
  -3  -1  -3  253.56   15.66
   3   1   3  238.70   15.66
  -3   1  -3  244.46   15.69
   4  -1   3   63.14    3.87
  -4  -1  -3   61.60    3.93
  -4   1  -3   54.02    3.89
  -4   1  -3   58.20    3.97
   4   1   3   60.83    3.92
  -5  -1  -3   25.41    1.86
   5  -1   3   26.08    1.79
  -5   1  -3   23.60    1.87
   5   1   3   28.43    1.87
   6  -1   3   33.29    2.29
   6   1   3   37.58    2.38
  -6   1  -3   30.14    2.38
  -7   1  -3    7.17    0.95
   7   1   3    7.97    0.91
  -8   1  -3   39.03    2.84
  -9   1  -3   15.08    1.57
   9   1   3   13.06    1.54
  10  -1   3    2.07    1.50
  10   1   3    2.18    1.52
  10   1   3    1.69    1.19
 -10   1  -3    2.29    0.95
  10   1   3    1.13    0.98
  11  -1   3    1.36    1.60
  11   1   3    0.54    1.03
  11   1   3    1.08    1.16
  11   1   3   -0.13    1.56
  12  -1   3    3.48    1.73
  12   1   3    3.01    1.06
  12   1   3    3.37    1.56
  12   1   3    2.31    1.23
  13  -1   3    6.06    1.86
  13   1   3    3.26    1.24
  13   1   3    2.35    1.43
  13   1   3    4.24    1.03
  14  -1   3    7.73    1.20
  14  -1   3    8.24    1.79
  14   1   3    7.21    1.07
  14   1   3    8.09    1.37
  15  -1   3    3.21    1.21
  15  -1   3    3.98    0.85
  15   1   3    4.46    0.74
  16  -2  -3    0.88    0.95
  16   2  -3    0.71    0.77
  15  -2  -3    1.05    1.16
  15  -2  -3    2.55    0.88
  15   2  -3    0.99    0.96
  14  -2  -3    7.83    1.50
  14  -2  -3    4.67    0.99
  14   2  -3    2.55    1.17
  13  -2  -3    3.91    1.34
  13   2  -3    5.92    1.42
  13   2  -3    5.22    1.43
  12  -2  -3    2.06    1.20
  12   2  -3    2.48    1.31
  11  -2  -3    1.75    1.04
  11   2  -3    0.18    1.07
  11   2  -3    0.98    0.63
  10  -2  -3    2.68    0.97
  10   2  -3    3.98    1.04
 -10   2   3    3.82    1.23
  10   2  -3    3.04    0.76
   9   2  -3   13.05    1.25
  -9   2   3   13.32    1.19
   9   2  -3   11.84    1.25
   8   2  -3    2.93    0.66
  -8   2   3    3.57    0.58
  -7   2   3  109.33    7.12
   7   2  -3  111.13    7.15
   6  -2  -3   51.59    3.29
  -6   2   3   43.98    3.27
   6   2  -3   55.04    3.41
   5  -2  -3   14.32    1.09
   5   2  -3   15.56    1.29
  -5   2   3   14.51    1.10
   4  -2  -3    5.47    0.58
  -4   2   3    4.72    0.50
   4   2  -3    5.07    0.70
   3  -2  -3    5.35    0.58
   3   2  -3    6.88    0.73
   3   2  -3    5.55    1.07
  -3   2   3    4.59    0.55
   2  -2  -3   11.01    0.84
   2   2  -3    9.01    0.91
   2   2  -3   10.31    1.46
  -2   2   3   11.45    0.81
   1  -2  -3   34.29    2.36
  -1   2   3   36.00    2.37
  -1   2   3   37.00    2.34
  -1   2   3   36.72    2.47
   1   2  -3   34.86    2.70
   0  -2  -3   57.04    3.75
   0   2   3   62.81    3.75
   0   2   3   58.72    3.82
   0   2  -3   52.02    3.95
   1   2   3   47.98    3.18
  -1   2  -3   49.65    3.15
   1   2   3   48.66    3.27
  -1   2  -3   48.16    3.37
   2   2   3   85.98    5.85
  -2   2  -3   93.14    5.99
  -2   2  -3   93.43    5.84
   3   2   3   39.91    2.94
  -3   2  -3   47.73    3.13
  -3   2  -3   45.55    2.93
  -4   2  -3  131.58    9.16
   4   2   3  138.39    9.17
  -4   2  -3  158.06    9.29
   5   2   3  186.36   12.14
  -5   2  -3  186.55   12.14
  -5   2  -3  194.25   12.23
  -6   2  -3   25.56    2.03
  -7   2  -3   43.80    3.06
  -7   2  -3   40.93    2.95
   8   2   3   12.03    1.27
  -8   2  -3   10.76    1.18
  -8   2  -3    9.27    1.15
  -8   2  -3   10.69    1.28
   9   2   3    4.60    1.64
  -9   2  -3    3.05    0.91
   9   2   3    4.35    1.19
   9   2   3    5.20    1.01
  -9   2  -3    4.16    0.98
  -9   2  -3    3.97    1.32
 -10   2  -3    9.80    1.28
  10   2   3    9.62    1.49
  10   2   3    7.88    1.72
  10   2   3    9.03    1.23
 -11   2  -3    0.77    0.88
  11   2   3    0.79    1.22
  11   2   3    2.16    1.24
  11   2   3    2.35    0.93
  12   2   3    2.87    1.27
 -12   2  -3    1.72    0.86
  12   2   3    0.01    1.09
  12   2   3    2.42    0.86
  13  -2   3    1.27    1.47
  13   2   3    1.85    0.72
 -13   2  -3    2.19    0.80
  13   2   3    1.66    1.13
  14  -2   3    0.84    1.29
 -14   2  -3    3.18    0.73
  14   2   3    3.37    0.60
  14   2   3    2.16    1.02
  15  -2   3    0.58    0.96
  15   2   3    1.51    0.77
 -15   2  -3    1.48    0.59
  15  -3  -3    2.16    0.99
  15   3  -3    1.19    0.74
  14  -3  -3    1.51    1.16
 -14   3   3    2.06    0.62
  14   3  -3    1.88    0.93
  13  -3  -3    1.36    1.11
 -13   3   3    1.41    0.67
  13   3  -3    0.26    1.04
  12  -3  -3    6.59    1.29
  12   3  -3    4.15    1.22
 -12   3   3    6.86    0.86
 -11   3   3   15.65    1.29
  11   3  -3   13.30    1.64
 -10   3   3    6.09    0.75
 -10   3   3    2.85    1.24
  10   3  -3    6.76    1.27
  10   3  -3    6.61    1.27
 -10   3   3    6.46    0.75
  -9   3   3   15.34    1.23
   9   3  -3   13.71    1.53
  -8   3   3    8.12    0.97
   8   3  -3    7.54    1.07
  -8   3   3    6.34    1.28
   8   3  -3    5.94    1.05
  -8   3   3    8.10    0.83
  -8   3   3    7.81    0.76
  -7   3   3   11.85    0.96
   7   3  -3   10.42    1.20
  -7   3   3   11.49    0.93
  -7   3   3    9.28    1.33
  -6   3   3   20.69    1.89
   6   3  -3   22.91    1.74
  -6   3   3   22.38    1.57
  -5   3   3   25.88    2.02
   5   3  -3   24.51    1.85
  -5   3   3   24.47    1.73
  -4   3   3   31.58    2.14
   4   3  -3   22.62    1.99
   4   3  -3   28.40    2.02
  -4   3   3   29.05    1.90
   3   3  -3   21.43    1.75
   3   3  -3   22.90    2.33
  -3   3   3   24.72    1.68
  -3   3   3   29.61    1.95
   3   3  -3   23.11    1.76
  -2   3   3   11.81    1.23
  -2   3   3   10.34    0.88
   2   3  -3   11.29    1.47
  -1   3   3   45.57    2.97
  -1   3   3   47.87    3.16
   1   3  -3   40.55    3.33
   0   3  -3   62.78    4.54
   0   3   3   65.54    4.39
   0   3   3   65.43    4.22
  -1   3  -3   17.65    1.23
  -1   3  -3   16.26    1.78
  -2   3  -3   12.01    1.52
  -2   3  -3   13.38    1.02
  -3   3  -3   40.44    3.13
  -3   3  -3   42.25    2.79
  -4   3  -3   20.90    1.76
  -4   3  -3   18.45    1.40
   4   3   3   14.07    1.40
  -5   3  -3    9.74    1.34
  -5   3  -3   10.01    1.05
  -6   3  -3    4.18    0.71
  -6   3  -3    3.39    0.76
   6   3   3    2.54    0.85
  -6   3  -3    2.40    0.88
  -7   3  -3    2.10    0.73
   7   3   3    1.05    1.04
  -7   3  -3    2.72    0.89
   7   3   3    1.65    0.87
  -7   3  -3    3.41    0.89
  -7   3  -3    1.79    0.73
  -8   3  -3    5.23    0.93
  -8   3  -3    5.44    1.06
  -8   3  -3    3.82    1.05
  -8   3  -3    4.25    0.90
   8   3   3    4.53    1.03
   8   3   3    5.49    1.26
   9   3   3    1.55    0.85
  -9   3  -3    0.62    0.92
  -9   3  -3    0.06    0.81
   9   3   3    1.99    1.18
  -9   3  -3    1.31    0.94
 -10   3  -3    3.71    1.06
  10   3   3    3.57    1.31
  10   3   3    3.56    0.82
 -10   3  -3    4.52    1.00
  11   3   3   -0.47    0.54
  11   3   3    1.09    1.23
 -11   3  -3    0.64    1.38
 -11   3  -3    0.87    0.80
  12   3   3    1.75    1.14
 -12   3  -3    1.74    0.74
  13   3   3    0.06    0.91
 -13   3  -3    0.56    0.62
 -14   3  -3    1.24    0.51
  14   3   3    0.91    0.76
 -13   4   3    5.09    0.69
  13   4  -3    2.37    0.76
 -12   4   3    1.33    0.61
  12   4  -3    0.44    0.89
  11   4  -3    1.63    1.04
 -11   4   3    4.28    0.74
  10   4  -3    1.02    1.10
 -10   4   3    4.24    0.70
  -9   4   3    8.86    0.85
   9   4  -3    5.26    1.31
  -9   4   3    8.61    1.04
  -9   4   3    7.56    0.88
  -8   4   3    0.65    0.71
  -8   4   3    1.44    0.54
  -8   4   3   -0.18    0.99
  -7   4   3   45.80    3.06
  -7   4   3   47.28    3.16
  -7   4   3   42.78    3.45
  -6   4   3   31.35    2.63
  -6   4   3   32.32    2.23
  -6   4   3   35.56    2.53
  -6   4   3   31.71    2.34
  -5   4   3   32.16    2.47
  -5   4   3   30.10    2.06
  -5   4   3   28.67    2.18
   5   4  -3   29.80    2.35
  -5   4   3   29.99    2.10
  -4   4   3    9.38    1.01
  -4   4   3    8.89    0.87
  -4   4   3   11.45    1.37
  -4   4   3   10.90    0.84
   4   4  -3    9.27    1.17
   3   4  -3    6.88    0.91
  -3   4   3    6.10    0.67
  -3   4   3    6.63    0.66
  -3   4   3    8.04    0.82
  -3   4   3    7.64    1.26
   2   4  -3    1.16    0.63
   2   4  -3    0.42    1.22
  -2   4   3    0.33    0.34
  -2   4   3    0.57    0.39
  -2   4   3    0.65    0.88
  -1   4   3    2.95    0.49
  -1   4   3    3.98    0.48
   1   4  -3    3.40    0.70
  -1   4   3    3.62    1.05
   1   4  -3    3.42    1.31
   0   4  -3    0.56    1.15
   0   4   3    0.36    0.35
   0   4   3    0.17    0.37
  -1   4  -3    1.60    1.18
   1   4   3    1.70    0.43
   1   4   3    2.24    0.40
   2   4   3    0.13    0.33
  -2   4  -3    0.02    1.09
   2   4   3    0.70    0.43
   2   4   3    0.22    0.63
  -3   4  -3    0.28    0.50
   3   4   3    0.21    0.71
   3   4   3    0.16    0.44
  -3   4  -3    0.24    0.61
   3   4   3    0.81    0.35
  -3   4  -3    0.43    1.01
  -4   4  -3    6.00    1.26
   4   4   3    5.57    0.98
  -4   4  -3    4.74    0.62
  -4   4  -3    5.32    0.74
  -4   4  -3    6.13    0.80
   4   4   3    4.76    0.55
   5   4   3    9.27    0.80
  -5   4  -3   11.26    1.00
  -5   4  -3   10.99    1.58
  -5   4  -3   11.72    1.16
  -5   4  -3    9.95    1.06
   5   4   3   12.98    1.37
   6   4   3    1.67    1.02
  -6   4  -3    1.73    0.63
  -6   4  -3    1.50    0.76
  -6   4  -3    0.96    0.93
  -7   4  -3   26.47    2.25
  -7   4  -3   34.37    2.63
   7   4   3   31.49    2.58
  -7   4  -3   27.45    2.15
  -8   4  -3   13.52    1.42
  -8   4  -3   13.01    1.25
   8   4   3   10.48    1.54
   9   4   3   15.45    1.89
  -9   4  -3   19.11    1.51
  -9   4  -3   17.52    1.65
 -10   4  -3    8.55    1.14
 -10   4  -3    9.12    1.00
  10   4   3    7.56    1.30
 -11   4  -3    4.91    0.71
  11   4   3    2.48    0.97
 -11   4  -3    4.13    0.86
  12   4   3    1.49    0.77
 -12   4  -3    3.85    0.55
  13   4   3    0.79    0.55
 -11   5   3    1.64    0.44
 -10   5   3    1.04    0.52
 -10   5   3    1.04    0.70
  -9   5   3    1.32    0.53
  -9   5   3    0.03    0.72
  -8   5   3    6.09    0.97
  -8   5   3    7.98    0.85
  -7   5   3   11.92    1.02
  -7   5   3   10.03    1.19
  -6   5   3    0.86    0.47
  -6   5   3    1.19    0.72
  -6   5   3    1.64    0.54
  -5   5   3    2.30    0.74
  -5   5   3    3.41    0.54
  -5   5   3    3.10    0.56
  -4   5   3    9.66    1.08
  -4   5   3    8.94    0.83
  -3   5   3   80.27    5.27
  -3   5   3   78.37    5.12
  -2   5   3   56.47    3.77
  -2   5   3   54.71    3.58
   1   5  -3   35.23    3.54
  -1   5   3   44.48    2.89
   0   5  -3   16.11    2.29
   0   5   3   18.21    1.48
  -1   5  -3    9.62    0.96
  -1   5  -3   10.09    1.73
   1   5   3   11.79    1.11
  -2   5  -3    3.62    0.68
  -2   5  -3    2.98    1.30
   2   5   3    4.94    0.77
   3   5   3    0.51    0.68
  -3   5  -3    0.28    0.61
   4   5   3    1.37    0.76
  -4   5  -3    1.11    0.67
   5   5   3    0.47    0.78
  -5   5  -3    0.33    0.69
   6   5   3    1.46    0.91
  -6   5  -3    1.37    0.75
   7   5   3    0.48    0.87
  -7   5  -3    1.70    0.76
  -8   5  -3    2.65    0.77
   8   5   3    1.42    0.87
  -9   5  -3    1.11    0.72
   9   5   3    0.83    0.71
  10   5   3   -0.03    0.56
 -10   5  -3    1.09    0.65
  -8   6   3    0.77    0.55
  -7   6   3    6.72    0.82
  -6   6   3   13.58    1.20
  -5   6   3    5.40    0.77
  -4   6   3    2.10    0.60
  -3   6   3    0.13    0.53
  -2   6   3    1.58    0.56
  -1   6   3   -0.02    0.49
   0   6   3    1.41    0.52
   1   6   3    1.12    0.50
  -2   6  -3   -0.54    0.56
   2   6   3    0.43    0.51
   3   6   3    1.86    0.60
  -3   6  -3    2.91    0.67
   4   6   3    0.86    0.56
  -4   6  -3    0.08    0.59
  -5   6  -3   -0.10    0.59
   5   6   3    0.58    0.57
   6   6   3    1.53    0.54
  -6   6  -3    3.41    0.65
   7   6   3    2.76    0.51
  -7   6  -3    5.39    0.71
  16   0  -4    1.21    0.61
  15   0  -4    3.06    1.23
  15   0  -4    2.92    1.11
  15   0  -4    1.39    0.89
  14   0  -4    5.91    1.31
  14   0  -4    8.38    1.60
  14   0  -4    8.06    1.26
  13   0  -4   37.19    2.82
  13   0  -4   35.10    2.84
  13   0  -4   38.71    3.15
  12   0  -4    0.03    0.97
  12   0  -4    1.23    0.91
  12   0  -4    2.42    1.39
  11   0  -4    0.11    1.09
  11   0  -4    0.70    0.85
  11   0  -4    0.90    0.82
  10   0  -4   11.89    1.22
   8   0  -4    5.76    0.73
   7   0  -4  152.97    9.82
   6   0  -4   99.70    6.37
   6   0  -4   97.58    6.34
   5   0  -4   72.05    4.59
  -5   0   4   68.06    4.60
   5   0  -4   72.90    4.62
  -4   0   4  188.98   12.35
   4   0  -4  186.00   12.34
   4   0  -4  205.93   12.37
  -3   0   4  136.90    8.58
   3   0  -4  131.86    8.58
  -2   0   4  558.90   36.22
   2   0  -4  581.56   36.22
   1   0  -4    7.43    0.68
  -1   0  -4  123.30    7.89
  -2   0  -4    2.33    0.55
  -3   0  -4    0.27    0.55
  -4   0  -4    2.73    0.60
   4   0   4    2.42    0.57
   5   0   4   20.26    1.47
  -5   0  -4   18.77    1.53
  -6   0  -4    3.64    0.71
   6   0   4    3.66    0.64
  -7   0  -4   88.07    5.94
   7   0   4   91.76    5.88
  -8   0  -4   14.97    1.53
  10   0   4   27.90    2.99
  10   0   4   24.64    2.60
  11   0   4   28.21    2.40
  11   0   4   28.66    3.17
  12   0   4    9.47    1.34
  12   0   4   11.57    2.14
  13   0   4    5.92    1.85
  13   0   4    7.04    1.19
  14   0   4    1.15    0.91
  14   0   4    0.91    1.38
  15   0   4   -0.39    0.67
  15   0   4   -0.15    1.04
  16  -1  -4   11.02    1.39
  15  -1  -4    2.95    0.98
  15  -1  -4    4.35    1.32
  15   1  -4    1.70    1.06
  14  -1  -4    0.32    1.29
  14  -1  -4    0.07    0.95
  14   1  -4    1.85    1.21
  14   1  -4    0.01    0.72
  14   1  -4    0.22    1.25
  13  -1  -4    7.94    1.21
  13  -1  -4    8.75    1.58
  13   1  -4    6.22    1.32
  13   1  -4    6.72    1.13
  12  -1  -4   34.40    2.82
  12  -1  -4   35.73    2.57
  12   1  -4   34.93    2.65
  12   1  -4   29.26    2.55
  11  -1  -4    8.14    1.32
  11  -1  -4    7.02    1.01
  11   1  -4    8.86    1.16
  11   1  -4    6.76    1.40
  11   1  -4    7.88    1.16
  10  -1  -4    3.93    1.00
  10  -1  -4    5.02    0.82
  10   1  -4    5.47    0.89
  10   1  -4    4.16    0.88
  10   1  -4   -0.38    1.48
   7  -1  -4   43.98    2.85
  -7   1   4   39.74    2.88
   7   1  -4   45.07    2.93
   6  -1  -4    6.61    0.66
  -6   1   4    5.62    0.62
   6   1  -4    6.00    0.77
   5  -1  -4    3.80    0.51
   5   1  -4    3.61    0.66
  -5   1   4    4.35    0.48
   5   1  -4    3.22    0.43
   4  -1  -4   96.45    6.34
  -4   1   4   99.56    6.33
   4   1  -4  105.54    6.39
   4   1  -4   93.90    6.31
   3  -1  -4  199.80   13.28
   3   1  -4  209.77   13.31
  -3   1   4  211.68   13.27
   3   1  -4  212.18   13.25
   2  -1  -4   25.00    1.78
  -2   1   4   27.37    1.77
   2   1  -4   26.22    1.72
   1  -1  -4   28.26    1.88
   1   1  -4   25.70    2.15
   1   1  -4   27.53    1.80
   0  -1  -4  123.12    8.18
   0   1  -4  126.68    8.29
   0   1  -4  133.38    8.16
  -1  -1  -4  105.58    6.95
  -1   1  -4  105.38    7.03
  -1   1  -4  114.01    6.95
  -2  -1  -4   98.47    6.45
  -2   1  -4   91.30    6.48
  -2   1  -4  103.37    6.44
   2   1   4  107.43    6.46
  -3  -1  -4   17.23    1.25
  -3   1  -4   15.77    1.20
  -3   1  -4   14.68    1.29
   3   1   4   15.84    1.25
  -4  -1  -4   58.90    3.86
   4  -1   4   61.87    3.82
  -4   1  -4   50.89    3.88
  -4   1  -4   58.93    3.85
   4   1   4   62.07    3.86
  -5  -1  -4   71.60    4.56
   5  -1   4   72.11    4.51
  -5   1  -4   72.65    4.56
  -5   1  -4   61.94    4.57
   5   1   4   68.79    4.54
   6  -1   4    3.96    0.63
  -6   1  -4    5.09    0.77
   6   1   4    4.77    0.70
  -7   1  -4   55.83    3.80
  -8   1  -4   46.51    3.28
  -9   1  -4    9.34    1.21
   9   1   4   10.41    1.59
   9   1   4   10.73    1.33
   9   1   4    8.54    1.80
  10   1   4   -0.65    1.16
 -10   1  -4    0.18    0.95
  10   1   4   -1.51    1.48
  10   1   4   -0.02    0.92
  11  -1   4    0.12    1.60
  11   1   4    0.96    1.68
  11   1   4    1.39    1.24
  11   1   4   -0.28    0.97
  12  -1   4    2.42    1.73
  12   1   4    3.41    1.43
  12   1   4    1.73    1.56
  12   1   4    2.37    1.06
  13  -1   4    2.30    1.67
  13   1   4    1.39    0.92
  13   1   4    1.93    1.39
  14  -1   4   -0.54    1.33
  14   1   4   -0.66    0.73
  14   1   4   -0.82    1.02
  15  -1   4    0.92    0.71
  15  -1   4    1.13    1.06
  15   1   4    0.61    0.59
  16  -2  -4    0.35    0.92
  16   2  -4    0.84    0.72
  15  -2  -4    1.21    1.08
  15  -2  -4    2.57    0.84
  15   2  -4    0.06    0.91
  14  -2  -4   12.58    1.39
  14  -2  -4   13.72    1.84
  13  -2  -4   23.60    2.21
  13  -2  -4   21.21    1.82
  13   2  -4   19.40    2.16
  13   2  -4   19.39    2.03
  12  -2  -4    1.99    1.15
  12   2  -4    2.69    1.18
  11  -2  -4   12.16    1.50
  11   2  -4   12.22    1.47
  10  -2  -4    3.25    0.95
  10   2  -4    4.97    1.02
   9   2  -4    6.89    0.91
   9   2  -4    9.40    1.11
  -9   2   4    7.85    0.90
   8   2  -4    4.55    0.74
  -8   2   4    4.42    0.62
   7  -2  -4   14.96    1.12
  -7   2   4   14.44    1.11
   7   2  -4   12.36    1.21
   6  -2  -4   62.32    3.99
  -6   2   4   62.16    3.99
   6   2  -4   64.41    4.09
   6   2  -4   55.94    4.04
   5  -2  -4   75.33    4.85
   5   2  -4   73.79    4.92
  -5   2   4   75.26    4.84
   4  -2  -4   36.10    2.43
  -4   2   4   36.44    2.41
   4   2  -4   36.75    2.51
   3  -2  -4  201.58   12.91
  -3   2   4  211.38   12.90
   3   2  -4  193.66   12.94
   2  -2  -4  143.01    8.52
   2   2  -4  121.96    8.75
   1  -2  -4   31.77    2.06
  -1   2   4   30.16    2.14
  -1   2   4   31.81    2.03
   1   2  -4   26.58    2.40
   0  -2  -4   44.33    2.93
   0   2   4   44.87    2.90
   0   2  -4   44.12    3.19
   0   2   4   44.18    3.03
  -1  -2  -4   21.68    1.61
  -1   2  -4   21.55    1.89
   1   2   4   22.17    1.60
  -1   2  -4   26.16    1.58
  -2   2  -4   10.49    0.83
   2   2   4    8.48    0.85
  -2   2  -4    9.96    1.24
  -3   2  -4   40.95    2.94
   3   2   4   36.84    2.72
  -3   2  -4   44.30    2.71
   4   2   4   16.15    1.36
  -4   2  -4   16.63    1.64
  -4   2  -4   20.55    1.37
  -5   2  -4   35.44    2.62
  -5   2  -4   38.18    2.45
   5   2   4   31.79    2.42
  -6   2  -4   10.59    1.30
  -6   2  -4   10.89    1.11
  -7   2  -4    4.89    0.83
   7   2   4    5.58    0.98
  -7   2  -4    4.00    0.93
  -8   2  -4   18.63    1.71
  -8   2  -4   17.54    1.72
  -8   2  -4   20.54    2.07
   8   2   4   20.82    1.80
   8   2   4   20.19    2.49
   8   2   4   22.38    2.11
  -9   2  -4    4.71    1.01
  -9   2  -4    5.27    1.00
   9   2   4    5.60    1.06
   9   2   4    5.16    1.33
  -9   2  -4    5.74    1.42
   9   2   4    7.23    1.72
  10   2   4   11.80    1.64
  10   2   4   15.52    1.95
  10   2   4    9.40    1.32
 -10   2  -4    8.98    1.34
  11   2   4    8.12    1.18
  11   2   4    7.00    1.47
 -11   2  -4    9.34    1.27
  11   2   4    9.67    1.59
  12   2   4    9.73    1.21
  12   2   4   10.91    1.50
 -12   2  -4   13.14    1.39
  12   2   4   11.63    1.60
  13  -2   4    3.79    1.58
  13   2   4    3.68    1.15
 -13   2  -4    2.78    0.86
  13   2   4    4.52    0.78
  14  -2   4    2.23    1.22
  14   2   4    0.37    0.83
 -14   2  -4    0.17    0.61
  14   2   4    0.57    0.54
  15  -2   4    0.66    0.89
  15  -3  -4    1.29    0.92
  15   3  -4    0.35    0.70
  14  -3  -4    1.58    1.11
 -14   3   4    1.57    0.62
  14   3  -4   -0.02    0.82
  13  -3  -4    4.49    1.25
 -13   3   4    4.84    0.75
  13   3  -4    2.00    1.00
  12  -3  -4    4.50    1.18
 -12   3   4    2.48    0.67
  12   3  -4    1.67    1.08
 -11   3   4    5.47    0.71
 -11   3   4    5.57    0.73
  11   3  -4    6.01    1.24
  11   3  -4    5.44    1.24
  10   3  -4    9.60    1.25
 -10   3   4    3.06    1.23
 -10   3   4    8.26    0.81
  -9   3   4   16.67    1.26
   9   3  -4   18.75    1.62
   9   3  -4   12.68    1.50
  -8   3   4   17.75    1.31
  -8   3   4   15.60    1.22
   8   3  -4   13.79    1.50
   7   3  -4   37.96    2.66
  -7   3   4   36.75    2.48
  -7   3   4   35.17    2.45
  -6   3   4    9.30    1.33
  -6   3   4    9.84    0.92
  -6   3   4    9.31    0.85
   6   3  -4   10.31    1.11
   5   3  -4    1.99    0.63
  -5   3   4    2.42    0.45
  -5   3   4    3.46    0.86
  -4   3   4   32.63    2.39
  -4   3   4   29.63    2.11
   4   3  -4   32.11    2.22
  -3   3   4   88.56    5.76
  -3   3   4  103.39    5.94
   3   3  -4   73.52    6.13
   3   3  -4   88.60    5.81
   2   3  -4    1.47    1.06
  -2   3   4    1.43    0.39
  -2   3   4    1.16    0.66
   2   3  -4    1.59    0.50
  -1   3   4    6.81    0.75
   1   3  -4    7.76    1.26
  -1   3   4    6.49    0.86
   0   3   4    2.73    0.50
   0   3  -4    2.78    1.01
  -1   3  -4   19.29    1.35
  -1   3  -4   18.76    1.89
  -2   3  -4   23.62    1.62
  -2   3  -4   22.25    2.16
  -3   3  -4   -0.51    0.91
  -3   3  -4    0.97    0.49
  -4   3  -4    1.47    0.56
  -4   3  -4    1.24    0.94
  -5   3  -4    0.44    0.97
   5   3   4    1.63    0.74
  -5   3  -4    1.72    0.65
  -5   3  -4    1.32    0.62
  -6   3  -4   17.78    1.63
  -6   3  -4   16.48    1.50
   6   3   4   19.46    1.82
  -6   3  -4   18.13    1.54
   6   3   4   17.93    1.68
  -6   3  -4   18.25    1.86
  -7   3  -4   26.79    2.14
  -7   3  -4   28.11    2.19
   7   3   4   31.52    2.51
  -7   3  -4   29.31    2.44
  -7   3  -4   28.46    2.28
   7   3   4   29.29    2.31
   7   3   4   26.31    2.50
  -8   3  -4   32.81    2.64
   8   3   4   27.81    2.66
  -8   3  -4   35.44    2.76
   8   3   4   34.75    2.61
  -8   3  -4   34.52    2.51
   8   3   4   36.38    2.85
  -9   3  -4   -0.19    0.96
   9   3   4    0.64    1.18
   9   3   4    0.86    0.86
  -9   3  -4    2.12    0.86
  10   3   4   10.66    1.50
  10   3   4    7.92    1.05
 -10   3  -4    7.48    1.27
 -10   3  -4    8.66    1.14
 -11   3  -4    3.10    1.01
 -11   3  -4    5.69    0.97
  11   3   4    3.80    0.71
  11   3   4    4.85    1.29
 -12   3  -4    0.76    0.72
  12   3   4    0.68    1.04
  13   3   4    0.76    0.89
 -13   3  -4    1.61    0.60
 -14   3  -4   -0.09    0.47
  14   3   4    0.74    0.63
  13   4  -4    5.67    0.82
  12   4  -4    6.62    1.13
 -12   4   4   12.72    1.02
  11   4  -4    3.08    1.02
 -11   4   4    3.87    0.73
 -10   4   4    4.12    0.67
  10   4  -4    5.34    1.50
 -10   4   4    5.76    0.75
  -9   4   4    2.61    0.82
  -9   4   4    2.85    0.61
  -9   4   4    4.34    0.66
  -8   4   4    1.79    0.53
  -8   4   4    2.10    0.74
  -7   4   4    2.30    1.04
  -7   4   4    2.15    0.50
   7   4  -4    2.72    0.97
  -7   4   4    2.58    0.71
  -6   4   4   10.89    1.49
  -6   4   4   10.56    0.95
  -6   4   4   11.80    1.14
   6   4  -4   12.13    1.31
   5   4  -4    2.29    0.82
  -5   4   4    3.60    0.68
  -5   4   4    3.73    0.95
  -5   4   4    1.85    0.49
  -5   4   4    2.55    0.46
  -4   4   4    2.99    0.54
  -4   4   4    2.58    0.60
  -4   4   4    1.50    0.85
  -4   4   4    2.97    0.46
   4   4  -4    2.46    0.78
  -3   4   4   12.19    1.12
  -3   4   4   11.33    1.44
  -3   4   4   11.56    0.94
  -3   4   4   11.59    0.99
   3   4  -4   12.34    1.22
   2   4  -4   12.65    1.24
  -2   4   4   13.14    1.05
  -2   4   4   13.13    1.00
  -2   4   4   12.74    1.18
   2   4  -4   10.86    1.80
  -1   4   4    6.85    0.70
   1   4  -4    7.18    0.87
   1   4  -4    7.20    1.47
  -1   4   4    7.74    0.91
  -1   4   4    6.58    0.71
   0   4  -4   51.39    3.90
   0   4   4   50.27    3.22
   0   4   4   49.12    3.35
   0   4   4   45.41    3.23
  -1   4  -4   58.25    4.31
   1   4   4   57.95    3.66
   1   4   4   57.58    3.81
   1   4   4   50.72    3.68
  -2   4  -4   42.62    3.12
   2   4   4   51.18    3.09
   2   4   4   44.28    3.10
   2   4   4   48.81    3.25
  -2   4  -4   44.35    3.72
  -3   4  -4   29.26    2.83
  -3   4  -4   30.07    2.27
   3   4   4   32.94    2.42
   3   4   4   33.21    2.18
  -4   4  -4   16.55    1.92
   4   4   4   16.15    1.55
   4   4   4   13.99    1.18
  -4   4  -4   15.28    1.38
  -4   4  -4   13.86    1.36
   5   4   4   17.94    1.36
  -5   4  -4   18.23    2.03
   5   4   4   19.24    1.77
  -5   4  -4   16.64    1.33
  -5   4  -4   18.04    1.60
   6   4   4   13.97    1.61
  -6   4  -4   12.07    1.75
  -6   4  -4   12.82    1.09
   6   4   4   10.76    0.97
  -6   4  -4   11.39    1.32
  -7   4  -4    1.87    0.66
   7   4   4    2.54    1.06
  -7   4  -4    3.10    0.93
   7   4   4    1.28    0.38
   8   4   4    1.77    1.07
  -8   4  -4    2.11    0.91
  -8   4  -4    2.11    0.72
  -9   4  -4    2.85    0.73
  -9   4  -4    2.90    0.95
   9   4   4    2.77    1.07
 -10   4  -4   -0.40    0.59
  10   4   4   -0.87    0.92
 -10   4  -4   -0.82    0.76
  11   4   4    2.40    0.87
 -11   4  -4    2.21    0.56
 -11   4  -4    0.86    0.72
  12   4   4    1.38    0.69
 -12   4  -4    1.49    0.42
 -11   5   4   10.23    0.87
 -10   5   4   21.54    1.56
  -9   5   4   24.89    1.79
  -9   5   4   24.83    1.93
  -8   5   4   21.75    1.84
  -8   5   4   23.79    1.67
  -7   5   4   21.34    1.57
  -7   5   4   21.86    1.77
  -7   5   4   22.33    1.60
  -6   5   4    8.88    1.03
  -6   5   4    7.87    0.82
  -5   5   4    6.09    0.89
  -5   5   4    6.07    0.70
  -4   5   4    0.57    0.43
  -4   5   4    0.11    0.62
  -3   5   4    8.62    0.96
  -3   5   4    6.18    0.68
  -2   5   4    2.54    0.67
  -2   5   4    2.32    0.42
  -1   5   4    4.45    0.75
  -1   5   4    4.05    0.45
   1   5  -4    4.60    1.54
   0   5  -4    0.12    1.33
   0   5   4    0.60    0.59
   1   5   4    2.89    0.68
  -1   5  -4    3.72    2.17
  -2   5  -4    7.82    0.94
   2   5   4    8.65    1.03
  -3   5  -4    2.90    0.75
   3   5   4    3.08    0.78
   4   5   4    1.17    0.78
  -4   5  -4    2.03    0.75
  -5   5  -4    2.65    0.81
   5   5   4    4.01    0.90
   6   5   4    2.52    0.85
  -6   5  -4    2.34    0.82
  -7   5  -4    4.14    0.85
   7   5   4    3.06    0.89
   8   5   4    2.37    0.82
  -8   5  -4    1.47    0.76
   9   5   4   -0.18    0.60
  -9   5  -4    0.12    0.67
  10   5   4    0.59    0.51
 -10   5  -4    1.15    0.62
  -8   6   4    0.36    0.52
  -7   6   4    0.43    0.55
  -6   6   4    3.08    0.64
  -5   6   4    1.45    0.58
  -4   6   4    3.10    0.60
  -3   6   4    2.64    0.59
  -2   6   4    0.45    0.53
  -1   6   4    8.83    0.90
   0   6   4   11.57    1.03
   1   6   4   12.99    1.14
  -2   6  -4    7.04    0.85
   2   6   4    8.04    0.87
   3   6   4    6.19    0.78
  -3   6  -4    6.30    0.82
   4   6   4    4.38    0.72
  -4   6  -4    5.85    0.79
  -5   6  -4    5.53    0.78
   5   6   4    3.98    0.67
   6   6   4    1.98    0.54
  -6   6  -4    2.37    0.65
   7   6   4    1.05    0.43
  -7   6  -4    0.39    0.55
  16   0  -5    2.24    0.84
  16   0  -5    1.43    0.59
  15   0  -5    2.26    1.09
  15   0  -5    4.82    0.96
  15   0  -5    3.13    1.18
  14   0  -5    3.22    1.37
  14   0  -5    5.26    1.06
  14   0  -5    1.89    1.10
  13   0  -5   44.15    3.15
  13   0  -5   42.22    3.14
  13   0  -5   41.29    3.41
  12   0  -5   34.36    2.99
  12   0  -5   37.33    2.70
  12   0  -5   35.93    2.70
  11   0  -5   10.61    1.14
  11   0  -5    9.93    1.47
  11   0  -5    9.77    1.20
  10   0  -5   52.18    3.35
  10   0  -5   42.59    3.44
  10   0  -5   50.24    3.32
   8   0  -5   15.51    1.26
   7   0  -5    1.06    0.57
   7   0  -5    0.76    0.40
   6   0  -5   32.69    2.27
   6   0  -5   32.89    2.21
   5   0  -5    2.32    0.43
   4   0  -5   26.91    1.83
  -4   0   5   27.55    1.83
   3   0  -5    0.40    0.36
  -3   0   5    1.16    0.34
  -2   0   5    1.35    0.35
   2   0  -5    1.01    0.40
   1   0  -5  412.67   26.24
  -1   0  -5    0.63    0.39
  -2   0  -5   46.20    3.10
  -3   0  -5   70.85    4.64
  -4   0  -5  261.55   16.26
   4   0   5  247.39   16.24
  -5   0  -5   67.65    4.54
   5   0   5   69.83    4.51
  -6   0  -5   61.88    4.06
   6   0   5   59.40    4.00
  -7   0  -5    7.07    0.92
  -8   0  -5    7.89    1.04
   9   0   5    1.47    1.61
  10   0   5   -1.24    1.67
  11   0   5    6.93    1.30
  11   0   5    6.75    1.88
  12   0   5   -0.17    1.68
  12   0   5    2.12    1.06
  13   0   5    2.56    1.59
  13   0   5    1.46    0.98
  14   0   5    1.93    1.34
  14   0   5    1.23    0.82
  15   0   5    1.71    0.96
  15   0   5    0.96    0.64
  16  -1  -5    1.61    0.78
  16   1  -5    1.52    0.82
  15  -1  -5    1.10    1.15
  15  -1  -5    1.48    0.90
  15   1  -5    1.89    1.09
  15   1  -5    2.15    1.14
  14  -1  -5    2.15    0.95
  14  -1  -5    1.57    1.26
  14   1  -5    0.91    1.12
  14   1  -5    1.31    0.68
  13  -1  -5    3.90    0.99
  13  -1  -5    2.80    1.31
  13   1  -5    0.99    1.11
  13   1  -5    2.82    0.92
  12  -1  -5    0.25    1.14
  12  -1  -5   -0.63    0.81
  12   1  -5    1.68    0.93
  12   1  -5    0.92    1.01
  11  -1  -5    8.71    1.31
  11  -1  -5    7.56    1.03
  11  -1  -5    8.85    1.15
  11   1  -5    9.47    1.19
  11   1  -5    8.52    1.13
  10  -1  -5   24.83    2.01
  10  -1  -5   25.57    1.85
  10  -1  -5   22.76    1.87
  10   1  -5   23.60    1.86
  10   1  -5   20.16    2.06
  10   1  -5   25.53    1.88
   9   1  -5   31.08    2.22
   8  -1  -5   12.35    1.02
   7  -1  -5    4.56    0.58
   7   1  -5    4.32    0.70
  -7   1   5    5.00    0.61
   6  -1  -5   26.10    1.77
  -6   1   5   24.46    1.76
   6   1  -5   25.80    1.84
   5  -1  -5   52.73    3.47
  -5   1   5   53.27    3.45
   5   1  -5   52.96    3.43
   5   1  -5   52.41    3.52
   4  -1  -5    6.06    0.68
   4   1  -5    6.10    0.58
  -4   1   5    6.81    0.62
   4   1  -5    5.46    0.75
   3  -1  -5   51.06    3.33
   3   1  -5   50.99    3.27
  -3   1   5   50.03    3.30
   2  -1  -5  151.86    9.71
  -2   1   5  157.69    9.69
   2   1  -5  145.79    9.67
   1  -1  -5   54.95    3.57
   1   1  -5   54.80    3.78
   1   1  -5   53.62    3.52
   0  -1  -5  468.57   29.75
   0   1  -5  460.69   29.84
   0   1  -5  473.72   29.73
  -1  -1  -5  219.22   14.35
  -1   1  -5  235.30   14.35
  -1   1  -5  220.16   14.43
  -2  -1  -5    9.08    0.92
  -2   1  -5   10.51    0.91
   2   1   5    9.22    0.93
  -2   1  -5    8.64    1.08
  -3  -1  -5    7.11    0.77
  -3   1  -5    6.41    0.95
   3   1   5    7.28    0.85
  -3   1  -5    7.58    0.80
  -4  -1  -5    9.00    1.05
  -4   1  -5   10.67    0.99
   4   1   5   11.25    1.00
  -5  -1  -5    0.82    0.61
   5  -1   5    0.27    0.55
   5   1   5    0.53    0.58
  -5   1  -5    1.36    0.56
  -6  -1  -5    1.71    0.94
  -6   1  -5    2.14    0.63
  -7   1  -5    4.73    0.82
  -8   1  -5    4.29    0.93
   8   1   5    3.48    0.93
  -8   1  -5    3.31    0.86
   9   1   5    0.17    1.15
  -9   1  -5    0.71    0.85
   9   1   5    1.00    1.50
  -9   1  -5    1.14    0.91
   9   1   5    0.07    0.87
  10   1   5    0.88    1.56
  10   1   5    2.35    1.03
 -10   1  -5    2.04    0.90
  10   1   5    3.25    1.33
  11  -1   5    5.43    1.82
  11   1   5    5.70    1.78
  11   1   5    5.09    1.16
  12  -1   5    5.84    1.87
  12   1   5    6.91    1.70
  12   1   5    2.96    1.05
  13  -1   5    3.58    1.64
  13   1   5    2.86    0.94
  13   1   5    3.07    1.37
  14  -1   5    8.32    1.51
  14   1   5    7.20    0.97
  14   1   5    6.26    1.21
  15  -1   5    3.93    1.05
  15   1   5    4.72    0.68
  16  -2  -5    1.46    0.93
  16   2  -5    0.90    0.71
  15  -2  -5    5.42    0.92
  15   2  -5    2.16    0.93
  14  -2  -5   14.90    1.75
  14  -2  -5   15.05    1.38
  14   2  -5    7.65    1.46
  13  -2  -5   18.20    1.66
  13  -2  -5   21.86    2.07
  13   2  -5   17.34    1.89
  12  -2  -5    9.67    1.15
  12  -2  -5   12.21    1.54
  12   2  -5    8.51    1.40
  11  -2  -5    6.02    1.16
  11   2  -5    8.05    1.21
  10  -2  -5   40.78    3.07
  10   2  -5   42.42    2.97
   9  -2  -5   30.71    2.27
   9   2  -5   28.34    2.14
   9   2  -5   28.04    2.13
   8   2  -5   22.12    1.72
   7  -2  -5    9.55    0.93
  -7   2   5   11.66    0.93
   7   2  -5   11.09    1.07
   6  -2  -5   21.49    1.62
   6   2  -5   22.08    1.69
  -6   2   5   24.20    1.60
   5  -2  -5   66.97    4.31
  -5   2   5   66.34    4.29
   5   2  -5   69.56    4.38
   5   2  -5   60.65    4.46
   4  -2  -5   51.13    3.29
  -4   2   5   49.37    3.27
   4   2  -5   49.18    3.34
   3  -2  -5   19.81    1.40
  -3   2   5   18.99    1.38
   2  -2  -5    4.18    0.54
   2   2  -5    4.54    1.10
  -2   2   5    3.95    0.54
   1  -2  -5   21.03    1.48
   1   2  -5   20.36    1.96
  -1   2   5   20.43    1.44
   0  -2  -5   31.86    2.12
   0   2  -5   33.61    2.06
   0   2  -5   30.39    2.44
   0   2   5   28.40    2.09
  -1  -2  -5    7.39    0.72
  -1   2  -5    6.77    1.05
   1   2   5    5.64    0.69
  -1   2  -5    6.80    0.68
   2   2   5    4.57    0.64
  -2   2  -5    5.97    0.60
  -2   2  -5    4.29    0.96
   3   2   5   11.77    1.05
  -3   2  -5   10.33    1.39
  -3   2  -5   14.00    1.05
   4   2   5   86.36    5.68
  -4   2  -5   86.12    5.67
  -4   2  -5   88.74    5.86
  -5   2  -5   74.70    5.02
  -5   2  -5   72.36    4.85
  -6   2  -5   21.00    1.90
  -6   2  -5   22.00    1.70
  -7   2  -5    1.23    0.71
  -7   2  -5    1.34    0.78
   7   2   5    2.50    0.89
  -8   2  -5   10.07    1.25
  -8   2  -5   14.57    1.75
  -8   2  -5   12.97    1.43
   8   2   5   15.11    2.09
   8   2   5   12.43    1.43
   8   2   5   14.94    1.67
   9   2   5    7.13    1.15
  -9   2  -5    5.91    1.08
   9   2   5    5.74    1.72
  -9   2  -5    6.16    1.52
   9   2   5    7.46    1.40
 -10   2  -5    3.86    0.98
  10   2   5    4.12    1.03
  10   2   5    6.02    1.61
  10   2   5    2.37    1.26
  11   2   5    5.38    1.02
  11   2   5    3.49    1.28
  11   2   5    3.72    1.44
 -11   2  -5    4.20    1.06
  12   2   5   -0.08    1.07
 -12   2  -5    0.72    0.89
  12   2   5    0.04    0.75
  12   2   5   -0.62    1.02
  13  -2   5   -0.61    1.56
  13   2   5    0.45    0.94
 -13   2  -5   -0.17    0.72
  13   2   5   -0.13    0.62
  14  -2   5    0.36    1.04
 -14   2  -5    0.79    0.60
  14   2   5    0.05    0.46
  15   3  -5    1.04    0.70
  14  -3  -5    3.73    1.11
  14   3  -5    1.24    0.83
 -14   3   5    3.84    0.69
  13  -3  -5    6.86    1.24
  13   3  -5    3.46    1.00
 -13   3   5    4.47    0.74
  12  -3  -5    2.77    1.11
 -12   3   5    1.42    0.50
  12   3  -5    2.49    1.09
  12   3  -5    1.09    1.01
 -12   3   5    1.06    0.58
  11  -3  -5   12.87    1.50
 -11   3   5   12.45    1.12
  11   3  -5   12.94    1.49
 -11   3   5   11.73    1.10
  10   3  -5   20.91    1.81
  10   3  -5   22.62    1.87
 -10   3   5   20.55    1.59
   9   3  -5   11.53    1.25
  -9   3   5   11.14    0.99
   9   3  -5   11.73    1.34
  -8   3   5    3.58    0.55
   8   3  -5    6.15    0.93
  -8   3   5    3.85    0.59
  -7   3   5    4.23    0.54
  -7   3   5    3.39    0.54
  -7   3   5    4.19    0.90
   7   3  -5    3.48    0.81
   6   3  -5    7.35    0.89
  -6   3   5    6.01    0.69
  -6   3   5    7.07    0.73
  -5   3   5   12.20    1.07
   5   3  -5   14.48    1.25
  -5   3   5   14.99    1.50
  -4   3   5   10.38    1.00
   4   3  -5   12.84    1.15
  -4   3   5   15.11    1.39
   3   3  -5   25.23    1.82
  -3   3   5   25.06    1.95
  -3   3   5   24.58    1.75
   2   3  -5   50.59    3.99
  -2   3   5   56.85    3.50
   2   3  -5   50.46    3.52
  -1   3   5   17.66    1.27
   1   3  -5   15.45    1.28
   1   3  -5   16.45    1.90
   0   3  -5   21.52    2.10
  -1   3  -5   36.41    2.95
  -2   3  -5    9.82    0.89
  -2   3  -5    9.07    1.41
  -3   3  -5    7.47    1.39
  -3   3  -5   10.12    0.94
  -4   3  -5   44.04    2.95
   4   3   5   43.42    3.00
  -4   3  -5   42.61    3.42
  -4   3  -5   41.15    3.14
  -5   3  -5    7.76    1.40
  -5   3  -5    9.67    1.06
  -5   3  -5    9.34    1.06
   5   3   5   11.07    1.23
  -6   3  -5   15.67    1.89
   6   3   5   17.30    1.59
  -6   3  -5   14.17    1.39
  -6   3  -5   17.02    1.41
   6   3   5   11.52    1.93
   6   3   5   16.84    1.76
  -6   3  -5   14.36    1.56
   7   3   5   10.71    1.28
  -7   3  -5    8.73    1.09
  -7   3  -5    9.52    1.30
  -7   3  -5   11.01    1.14
   7   3   5    6.99    1.59
  -7   3  -5    7.85    1.34
   7   3   5   11.08    1.42
   8   3   5   38.04    2.91
   8   3   5   37.46    3.12
  -8   3  -5   37.35    2.80
   8   3   5   43.22    3.13
  -8   3  -5   37.85    3.02
   9   3   5   16.20    1.85
  -9   3  -5   14.49    1.47
  -9   3  -5   13.99    1.64
   9   3   5   11.80    1.52
   9   3   5   13.47    1.48
  10   3   5    5.09    0.90
  10   3   5    4.85    1.28
 -10   3  -5    4.91    0.96
 -10   3  -5    4.61    1.17
  11   3   5    4.62    0.72
  11   3   5    3.53    1.17
 -11   3  -5    3.57    0.98
 -11   3  -5    5.89    0.90
  12   3   5    1.07    0.41
  12   3   5    0.61    0.93
 -12   3  -5    0.76    0.67
  13   3   5   -0.05    0.71
 -13   3  -5    0.81    0.51
  13  -4  -5    1.31    0.95
 -13   4   5    3.01    0.61
 -12   4   5    0.01    0.58
  12   4  -5    1.11    0.76
 -11   4   5    5.84    0.80
 -10   4   5    1.76    0.57
 -10   4   5    3.95    0.64
  -9   4   5    2.26    0.58
  -8   4   5    1.83    0.52
   8   4  -5    2.00    0.94
  -8   4   5    1.75    0.76
   7   4  -5   13.21    1.43
  -7   4   5    9.68    1.48
  -7   4   5   12.23    1.22
  -7   4   5   13.39    1.05
   6   4  -5   40.54    2.99
  -6   4   5   40.01    2.77
  -6   4   5   42.22    2.88
  -6   4   5   41.21    3.19
  -5   4   5   41.19    3.16
  -5   4   5   42.25    2.91
   5   4  -5   43.38    3.03
  -5   4   5   40.11    2.80
  -5   4   5   42.76    2.94
   4   4  -5   49.87    3.36
  -4   4   5   50.13    3.31
  -4   4   5   44.90    3.22
  -4   4   5   45.25    3.78
  -4   4   5   49.24    3.19
   3   4  -5   23.11    1.85
  -3   4   5   20.72    1.66
  -3   4   5   24.27    1.75
  -3   4   5   23.34    1.64
   2   4  -5   18.71    2.28
  -2   4   5   18.38    1.44
   2   4  -5   18.55    1.57
  -2   4   5   19.93    1.41
  -2   4   5   19.33    1.54
  -1   4   5    4.77    0.61
  -1   4   5    4.35    0.55
   1   4  -5    4.46    0.78
   1   4  -5    3.52    1.37
  -1   4   5    4.88    0.72
   0   4  -5    7.08    1.57
   0   4   5    7.62    0.87
   0   4   5    6.68    0.71
   0   4   5    6.45    0.72
   1   4   5    3.87    0.65
   1   4   5    6.91    0.84
   1   4   5    5.25    0.62
  -1   4  -5    7.65    1.55
   2   4   5    1.88    0.54
   2   4   5    2.13    0.54
  -2   4  -5    2.73    1.35
   2   4   5    2.54    0.72
  -2   4  -5    1.91    0.65
   3   4   5    1.03    0.55
   3   4   5    0.74    0.78
  -3   4  -5   -0.05    0.65
  -3   4  -5    0.41    1.24
  -4   4  -5   14.92    2.06
   4   4   5   15.42    1.33
   4   4   5   18.39    1.68
  -4   4  -5   15.30    1.50
  -5   4  -5   11.16    1.26
  -5   4  -5    9.62    1.61
   5   4   5   10.60    1.09
   5   4   5   11.42    1.35
   6   4   5    2.11    0.64
  -6   4  -5    4.64    1.01
   6   4   5    4.82    1.05
  -6   4  -5    2.01    1.25
  -6   4  -5    2.73    0.54
   7   4   5    1.58    0.52
  -7   4  -5    1.91    0.58
  -7   4  -5    2.33    0.97
   7   4   5    2.56    1.01
  -8   4  -5    5.56    1.15
   8   4   5    6.03    1.18
  -8   4  -5    6.39    0.79
  -9   4  -5    5.92    0.75
  -9   4  -5    4.97    1.05
   9   4   5    4.72    1.08
 -10   4  -5    2.85    0.92
 -10   4  -5    5.85    0.67
  10   4   5    4.62    0.99
  11   4   5    3.17    0.79
 -11   4  -5    2.02    0.70
  12   4   5    0.06    0.57
 -11   5   5    0.65    0.45
 -10   5   5    3.13    0.54
  -9   5   5    3.04    0.76
  -9   5   5    4.50    0.62
  -8   5   5    0.08    0.41
  -8   5   5    0.12    0.49
  -8   5   5    1.01    0.71
  -7   5   5    0.92    0.48
  -7   5   5    1.33    0.48
  -7   5   5    1.55    0.70
  -6   5   5    9.22    0.87
  -6   5   5   10.80    1.10
  -5   5   5    3.61    0.78
  -5   5   5    4.66    0.59
  -4   5   5    4.57    0.59
  -4   5   5    4.33    0.78
  -3   5   5    0.97    0.42
  -3   5   5   -0.14    0.55
  -2   5   5    1.13    0.58
  -2   5   5    1.20    0.42
  -1   5   5    1.22    0.39
  -1   5   5    1.41    0.60
   0   5   5    9.05    1.00
   0   5   5    9.40    0.74
   1   5   5    2.65    0.67
  -2   5  -5    2.20    0.71
   2   5   5    4.24    0.77
   3   5   5    6.20    0.90
  -3   5  -5    5.09    0.88
   4   5   5    2.55    0.81
  -4   5  -5    3.44    0.84
   5   5   5    6.55    1.01
  -5   5  -5    7.75    1.04
  -6   5  -5    5.77    0.96
   6   5   5    4.25    0.90
  -7   5  -5    3.85    0.87
   7   5   5    3.14    0.80
  -8   5  -5    9.30    1.13
   8   5   5   10.34    1.15
   9   5   5    4.12    0.72
  -9   5  -5    7.05    0.85
  10   5   5    2.31    0.50
 -10   5  -5    2.91    0.61
  -7   6   5    8.96    0.87
  -6   6   5   25.50    1.83
  -5   6   5   18.26    1.41
  -4   6   5    7.08    0.80
  -3   6   5   11.91    1.06
  -2   6   5   13.21    1.13
  -1   6   5    3.44    0.59
   0   6   5    2.01    0.51
   1   6   5    3.33    0.58
   2   6   5    1.62    0.54
  -3   6  -5    0.41    0.56
   3   6   5   -0.40    0.49
   4   6   5    0.06    0.53
  -4   6  -5    0.20    0.60
   5   6   5    0.44    0.51
  -5   6  -5    1.52    0.63
   6   6   5    0.04    0.43
  -6   6  -5    0.56    0.58
  15   0  -6    2.02    0.83
  15   0  -6    3.26    1.05
  14   0  -6   -0.96    0.98
  14   0  -6    1.36    0.88
  13   0  -6    0.09    0.88
  13   0  -6   -0.35    1.15
  13   0  -6    0.66    0.99
  12   0  -6    7.70    1.07
  12   0  -6    5.38    1.34
  12   0  -6    6.82    1.12
  11   0  -6    0.82    1.05
  11   0  -6   -0.33    0.82
  11   0  -6   -0.24    0.70
  10   0  -6    4.65    1.02
  10   0  -6    4.10    0.74
  10   0  -6    2.83    0.78
   9   0  -6    2.03    0.60
   8   0  -6    0.66    0.42
   7   0  -6   12.73    1.03
   6   0  -6   40.58    2.70
   5   0  -6  100.38    6.46
   4   0  -6   57.26    3.73
   3   0  -6   62.39    4.05
   2   0  -6  510.51   32.09
  -2   0   6  498.60   32.07
   1   0  -6  111.63    7.17
   0   0  -6   -0.03    0.34
  -1   0  -6    0.68    0.45
  -2   0  -6   11.91    1.09
  -3   0  -6   22.70    1.71
  -4   0  -6   73.35    4.99
   4   0   6   78.34    4.98
  -5   0  -6   12.20    1.14
   5   0   6   11.82    1.13
  -6   0  -6    7.45    0.88
  -7   0  -6    6.11    0.87
  -8   0  -6    2.70    0.80
   9   0   6    3.02    1.63
  10   0   6    3.10    1.70
  11   0   6    3.30    1.73
  12   0   6    2.34    1.69
  12   0   6    4.69    1.09
  13   0   6   -0.50    1.42
  13   0   6    1.91    0.90
  14   0   6    0.08    0.69
  14   0   6    0.43    1.15
  15   0   6    1.68    0.83
  16  -1  -6    5.22    0.83
  16   1  -6    2.26    0.83
  15  -1  -6    0.20    0.82
  15  -1  -6    1.10    1.06
  15   1  -6    0.89    1.01
  15   1  -6   -0.03    1.04
  14  -1  -6   -0.80    1.16
  14  -1  -6    0.39    0.83
  14   1  -6   -0.76    1.01
  13  -1  -6    3.52    0.99
  13  -1  -6    4.65    1.27
  13   1  -6    3.26    1.12
  13   1  -6    2.51    0.85
  12  -1  -6   12.65    1.34
  12  -1  -6   13.40    1.64
  12  -1  -6    8.86    1.25
  12   1  -6   11.24    1.35
  12   1  -6   12.47    1.34
  11  -1  -6    6.07    0.91
  11  -1  -6    3.63    1.10
  11  -1  -6    5.85    1.06
  11   1  -6    7.10    1.00
  11   1  -6    6.56    1.07
  10  -1  -6   25.84    2.06
  10  -1  -6   23.41    1.89
  10  -1  -6   24.52    1.86
  10   1  -6   22.69    1.86
  10   1  -6   24.87    1.88
   9  -1  -6   29.50    2.09
   9   1  -6   29.09    2.10
   8  -1  -6   50.21    3.28
   8   1  -6   48.60    3.31
   7  -1  -6   51.60    3.32
   7   1  -6   48.52    3.35
   6  -1  -6  101.81    6.39
   6   1  -6  102.99    6.35
  -6   1   6   91.61    6.37
   5  -1  -6   32.69    2.20
   5   1  -6   32.74    2.15
  -5   1   6   31.59    2.17
   4  -1  -6   15.59    1.19
  -4   1   6   14.31    1.14
   4   1  -6   16.75    1.12
   3  -1  -6    6.99    0.72
   3   1  -6    7.04    0.65
  -3   1   6    8.28    0.70
   2  -1  -6   69.94    4.65
   2   1  -6   69.59    4.59
  -2   1   6   74.48    4.62
   1  -1  -6   23.74    1.70
   1   1  -6   23.99    1.64
   0  -1  -6   62.16    4.16
   0   1  -6   64.39    4.36
   0   1  -6   64.32    4.13
  -1  -1  -6    1.03    0.51
  -1   1  -6    0.69    0.81
  -1   1  -6    2.14    0.51
  -2  -1  -6    3.54    0.61
  -2   1  -6    3.49    0.79
  -2   1  -6    3.21    0.59
  -3  -1  -6   25.33    1.83
  -3   1  -6   22.08    1.78
   3   1   6   25.99    1.80
  -4  -1  -6    4.91    0.72
  -4   1  -6    4.57    0.66
   4   1   6    3.89    0.70
   5  -1   6    9.79    1.09
  -5  -1  -6   12.60    1.16
  -5   1  -6   13.27    1.11
   5   1   6   11.91    1.09
  -6  -1  -6   31.72    2.42
  -6   1  -6   32.82    2.34
  -7   1  -6   61.80    4.19
  -8   1  -6   62.44    4.73
   8   1   6   72.71    4.76
   8   1   6   77.02    5.20
  -8   1  -6   66.62    4.70
   9   1   6   11.68    1.94
  -9   1  -6    9.35    1.21
   9   1   6   10.70    1.31
  -9   1  -6    8.54    1.31
 -10   1  -6    3.04    1.03
  10   1   6    3.45    1.02
  10   1   6    2.36    1.64
  11  -1   6    2.54    1.72
 -11   1  -6    2.74    1.00
  11   1   6    2.12    1.03
  11   1   6    4.72    1.76
  12  -1   6    2.65    1.63
  12   1   6    3.44    1.60
 -12   1  -6    2.52    0.98
  12   1   6    2.44    0.99
  13  -1   6    1.55    1.39
 -13   1  -6   -0.42    0.80
  13   1   6    1.77    1.27
  13   1   6    2.70    0.87
  14  -1   6   -0.11    1.12
  14   1   6    0.89    0.66
 -14   1  -6    0.42    0.67
  14   1   6    1.10    0.92
  15  -2  -6    5.10    1.13
  15  -2  -6    6.20    0.92
  15   2  -6    2.91    0.92
  14  -2  -6    2.30    1.14
  14  -2  -6    2.15    0.86
  14   2  -6    2.51    1.10
  14   2  -6    2.56    1.11
  13  -2  -6   13.31    1.64
  13  -2  -6   10.86    1.21
  13   2  -6    8.09    1.37
  12  -2  -6    9.89    1.14
  12  -2  -6   12.03    1.52
  12   2  -6    8.64    1.35
  11  -2  -6    9.59    1.07
  11   2  -6    9.04    1.23
  10  -2  -6    4.05    1.00
  10   2  -6    4.28    0.90
  10   2  -6    1.24    0.72
   9  -2  -6   13.34    1.39
   9   2  -6   14.47    1.29
   9   2  -6   12.50    1.22
   8  -2  -6    7.41    0.83
  -8   2   6    8.73    0.84
   8   2  -6    8.15    0.98
   7  -2  -6   29.88    2.09
  -7   2   6   28.77    2.05
   7   2  -6   31.08    2.15
   6  -2  -6   13.87    1.13
  -6   2   6   13.42    1.07
   6   2  -6   14.06    1.19
   5  -2  -6    9.94    0.93
  -5   2   6    9.48    0.86
   5   2  -6   10.80    0.98
   4  -2  -6    2.55    0.52
  -4   2   6    1.47    0.43
   4   2  -6    4.22    0.76
   3  -2  -6   72.48    4.71
  -3   2   6   71.77    4.68
   2  -2  -6  207.83   13.23
  -2   2   6  205.66   13.22
   1  -2  -6   37.02    2.32
   1   2  -6   31.87    2.73
  -1   2   6   32.24    2.27
   0  -2  -6    4.10    0.60
   0   2   6    4.14    0.62
   0   2  -6    4.57    1.08
   0   2  -6    4.79    0.50
  -1  -2  -6   11.93    1.05
  -1   2  -6   11.07    1.52
  -1   2  -6   14.08    1.01
   1   2   6   12.48    1.08
  -2   2  -6   25.00    2.18
  -2   2  -6   28.17    1.84
   2   2   6   24.87    1.85
  -3   2  -6    1.85    0.87
  -3   2  -6    2.54    0.57
   3   2   6    2.74    0.61
  -4   2  -6    6.24    1.08
  -4   2  -6    6.67    0.78
  -5   2  -6   15.67    1.33
   6   2   6    4.02    0.91
  -6   2  -6    3.06    0.72
  -6   2  -6    2.92    0.78
  -7   2  -6    8.33    1.10
   7   2   6    8.32    1.37
   7   2   6    7.80    1.68
  -7   2  -6    7.99    1.42
  -7   2  -6    6.81    0.98
   7   2   6    8.85    1.15
  -8   2  -6   -0.32    0.75
   8   2   6    0.17    1.47
  -8   2  -6   -0.78    1.24
   8   2   6    1.63    1.15
   8   2   6    0.35    0.87
  -8   2  -6    0.51    0.87
   9   2   6    6.74    1.73
  -9   2  -6    6.07    1.14
  -9   2  -6    5.89    1.49
   9   2   6    8.22    1.16
   9   2   6    6.54    1.40
 -10   2  -6    1.72    0.99
 -10   2  -6    2.43    1.56
  10   2   6    0.30    1.13
  10   2   6    1.16    1.45
  10   2   6    1.11    0.92
  11   2   6    3.66    1.00
 -11   2  -6    6.15    1.10
  11   2   6    5.03    1.42
  11   2   6    6.88    1.29
  12   2   6   13.31    1.28
 -12   2  -6   11.86    1.29
  12   2   6    9.50    1.38
  12   2   6    9.99    1.43
 -13   2  -6    0.37    0.67
  13   2   6    1.25    0.62
  14  -2   6    0.39    0.94
  14   2   6    0.29    0.41
 -14   2  -6    0.87    0.50
  14  -3  -6   -0.32    0.94
  14   3  -6    1.27    0.78
  13  -3  -6   -0.02    1.03
  13   3  -6   -0.42    0.84
  12  -3  -6    5.31    1.20
  12   3  -6    5.26    1.10
  12   3  -6    4.50    1.10
  11  -3  -6    0.99    0.98
  11   3  -6   -1.21    0.90
  10  -3  -6    6.34    1.13
  10   3  -6    6.93    1.03
  10   3  -6    4.76    0.97
 -10   3   6    5.71    0.71
  -9   3   6   11.28    1.08
   9   3  -6   14.83    1.38
   8   3  -6    8.23    1.01
  -8   3   6    7.07    0.75
  -8   3   6    6.22    0.76
  -7   3   6   20.37    1.50
  -7   3   6   20.04    1.52
   7   3  -6   21.44    1.70
  -6   3   6   38.97    2.80
   6   3  -6   45.07    2.92
  -6   3   6   41.11    2.81
   5   3  -6    6.19    0.81
  -5   3   6    6.51    0.70
  -5   3   6    6.68    1.04
  -5   3   6    5.48    0.66
  -4   3   6    8.33    0.84
  -4   3   6    8.66    1.20
   4   3  -6    9.27    0.96
  -3   3   6   16.43    1.32
   3   3  -6   18.03    1.40
   2   3  -6   43.90    2.93
  -2   3   6   44.82    2.89
   2   3  -6   38.19    3.39
   1   3  -6   37.17    2.60
  -1   3   6   38.03    2.57
   1   3  -6   38.28    3.10
   0   3  -6   11.61    1.72
  -1   3  -6   38.44    3.11
  -2   3  -6   31.41    2.87
  -2   3  -6   35.37    2.33
  -3   3  -6   24.31    2.50
   3   3   6   26.95    2.01
  -3   3  -6   27.62    1.92
   4   3   6   22.21    1.68
  -4   3  -6   18.38    2.19
  -4   3  -6   20.37    1.56
  -4   3  -6   18.49    1.57
  -5   3  -6    9.24    1.03
  -5   3  -6   10.68    1.27
  -5   3  -6   11.05    1.11
   5   3   6   12.02    1.39
  -5   3  -6    6.40    1.43
   5   3   6   11.26    1.26
   5   3   6   12.15    1.87
  -6   3  -6    3.88    0.82
  -6   3  -6    5.97    0.89
   6   3   6    5.03    0.98
   6   3   6    3.51    1.61
  -6   3  -6    2.69    1.50
  -6   3  -6    3.47    1.08
   6   3   6    3.75    1.13
   7   3   6    5.81    1.31
  -7   3  -6    8.98    1.09
  -7   3  -6    8.65    1.34
   7   3   6    8.17    1.20
   7   3   6    6.58    1.67
  -8   3  -6   11.05    1.55
  -8   3  -6   11.92    1.27
   8   3   6   10.25    1.32
   8   3   6   11.82    1.73
   8   3   6    9.86    1.49
  -9   3  -6   17.86    1.86
   9   3   6   13.48    1.81
  -9   3  -6   17.80    1.55
   9   3   6   17.06    1.59
   9   3   6   17.37    1.88
 -10   3  -6    2.16    0.78
 -10   3  -6   -0.09    0.97
  10   3   6    0.17    1.03
  10   3   6    0.76    0.71
 -11   3  -6    0.67    0.81
  11   3   6    1.54    0.95
 -11   3  -6    0.67    0.69
  11   3   6    0.62    0.58
  12   3   6    2.06    0.42
  12   3   6    0.94    0.78
 -12   3  -6    0.64    0.57
  13   3   6    0.24    0.61
 -13   3  -6    0.31    0.44
 -13   4   6   17.57    1.35
  12  -4  -6   29.58    2.50
 -12   4   6   34.91    2.30
 -11   4   6    8.58    0.90
 -11   4   6   10.26    0.96
 -10   4   6   13.24    1.15
  -9   4   6   15.39    1.27
  -8   4   6    1.82    0.52
   8   4  -6    1.74    0.87
  -7   4   6    0.33    1.12
   7   4  -6    1.09    0.81
  -7   4   6    1.46    0.70
  -7   4   6    1.32    0.50
  -6   4   6    5.32    0.79
  -6   4   6    2.93    1.21
  -6   4   6    4.47    0.61
   6   4  -6    5.18    0.92
  -5   4   6   -0.10    0.58
  -5   4   6    0.51    0.42
   5   4  -6    1.14    0.77
  -4   4   6    1.64    0.60
  -4   4   6    2.28    0.50
  -4   4   6    2.01    0.54
   4   4  -6    2.20    0.78
  -3   4   6    6.84    0.78
  -3   4   6    8.13    0.88
   3   4  -6    8.13    0.98
  -3   4   6    6.34    0.75
  -2   4   6   30.12    2.18
  -2   4   6   34.97    2.31
   2   4  -6   31.10    2.33
  -2   4   6   30.93    2.20
  -1   4   6    2.95    0.51
  -1   4   6    3.83    0.67
   1   4  -6    3.05    1.48
  -1   4   6    2.73    0.55
   0   4   6    1.33    0.48
   0   4  -6    1.43    1.36
   0   4   6    1.23    0.45
   0   4   6    1.93    0.62
   1   4   6   15.95    1.42
  -1   4  -6   16.80    2.22
   1   4   6   16.92    1.25
   1   4   6   13.47    1.26
   2   4   6    8.12    0.86
  -2   4  -6    6.81    0.90
   2   4   6    9.35    1.05
  -2   4  -6    7.31    1.63
   2   4   6    4.83    0.75
  -3   4  -6    4.33    0.84
  -3   4  -6    0.69    1.30
   3   4   6    3.16    0.70
   3   4   6    4.58    0.87
   4   4   6    2.32    0.72
   4   4   6    2.27    0.90
  -4   4  -6    1.48    0.83
  -5   4  -6    1.54    1.34
  -5   4  -6    0.45    0.87
   5   4   6    0.95    0.69
   5   4   6    3.05    0.96
  -6   4  -6    0.28    0.95
   6   4   6    0.47    0.66
   6   4   6    0.46    0.93
   7   4   6    0.13    0.56
  -7   4  -6    0.44    0.98
   7   4   6    0.05    0.90
  -8   4  -6    1.09    1.00
   8   4   6    0.96    0.89
   8   4   6    1.02    0.43
   9   4   6    1.56    0.86
  -9   4  -6    1.74    0.93
 -10   4  -6    1.39    0.78
  10   4   6    1.30    0.80
 -11   4  -6    7.49    0.88
  11   4   6    6.40    0.90
 -10   5   6    0.89    0.44
  -9   5   6    0.27    0.45
  -8   5   6    0.64    0.44
  -8   5   6    0.80    0.64
  -8   5   6    0.04    0.40
  -7   5   6    1.35    0.48
  -7   5   6    3.18    0.72
  -6   5   6    1.12    0.43
  -6   5   6    0.98    0.62
  -5   5   6    0.54    0.43
  -5   5   6    0.43    0.60
  -4   5   6    1.81    0.64
  -4   5   6    3.22    0.51
  -3   5   6   14.12    1.08
  -3   5   6   13.73    1.23
  -2   5   6   12.39    1.14
  -2   5   6   11.82    0.98
  -1   5   6   12.47    0.94
  -1   5   6    9.89    1.12
   0   5   6   12.71    0.93
   0   5   6    9.70    1.13
   1   5   6   23.28    1.56
   1   5   6   21.48    1.78
  -2   5  -6   13.11    1.28
   2   5   6   13.56    1.30
   3   5   6    4.80    0.85
  -3   5  -6    5.60    0.87
  -4   5  -6    9.20    1.12
   4   5   6    9.76    1.18
   5   5   6    5.44    0.91
  -5   5  -6    6.76    1.01
  -6   5  -6    1.06    0.84
   6   5   6    0.04    0.67
   7   5   6   -0.47    0.62
  -7   5  -6   -0.48    0.75
  -8   5  -6   -0.02    0.70
   8   5   6   -0.32    0.57
   9   5   6    0.23    0.48
  -9   5  -6    0.37    0.58
  -7   6   6    1.58    0.51
  -6   6   6    1.03    0.49
  -5   6   6    1.36    0.51
  -4   6   6    0.77    0.48
  -3   6   6    0.96    0.49
  -2   6   6    2.22    0.54
  -1   6   6    6.76    0.76
   0   6   6    1.98    0.50
   1   6   6    2.27    0.52
   2   6   6    2.69    0.55
   3   6   6    4.81    0.66
   4   6   6    1.65    0.54
  -4   6  -6    2.18    0.60
   5   6   6    0.19    0.44
  -5   6  -6    0.79    0.54
  16   0  -7    0.70    0.83
  16   0  -7    0.31    0.77
  15   0  -7    0.17    0.93
  15   0  -7   -0.60    0.71
  14   0  -7   10.31    1.25
  14   0  -7   12.52    1.36
  13   0  -7    5.75    1.12
  13   0  -7    6.74    1.04
  13   0  -7    4.40    1.22
  12   0  -7   20.48    1.71
  12   0  -7   18.63    1.94
  12   0  -7   16.76    1.62
  11   0  -7   21.10    1.99
  11   0  -7   21.22    1.82
  11   0  -7   25.34    1.81
  10   0  -7   38.91    2.61
  10   0  -7   36.18    2.76
  10   0  -7   35.94    2.62
   9   0  -7   45.18    3.05
   8   0  -7   17.01    1.29
   7   0  -7    1.33    0.47
   6   0  -7    1.31    0.45
   5   0  -7   29.52    2.02
   4   0  -7  109.23    7.03
   3   0  -7   20.77    1.50
   2   0  -7   22.22    1.59
   1   0  -7  123.79    7.95
   0   0  -7   68.02    4.43
  -1   0  -7    5.44    0.67
  -2   0  -7   29.73    2.11
  -3   0  -7   42.90    2.94
  -4   0  -7    4.04    0.69
   4   0   7    2.78    0.68
  -5   0  -7   25.31    1.92
  -6   0  -7    6.80    0.88
  -7   0  -7   -1.03    0.68
  -8   0  -7    0.04    0.74
   8   0   7    1.47    1.56
   9   0   7    3.59    1.65
  10   0   7   16.99    2.28
  11   0   7   19.47    2.54
  12   0   7    9.05    1.81
  13   0   7    2.32    0.82
  13   0   7    3.52    1.47
  14   0   7    0.66    1.07
  14   0   7    0.72    0.63
  16  -1  -7    3.84    0.74
  16   1  -7    1.54    0.77
  15  -1  -7   12.85    1.18
  15  -1  -7    7.11    1.20
  15   1  -7    6.96    1.21
  14  -1  -7   41.24    3.16
  14  -1  -7   44.00    2.97
  14   1  -7   37.29    2.98
  13  -1  -7   10.21    1.19
  13  -1  -7   11.40    1.49
  13  -1  -7    8.36    1.39
  13   1  -7    7.77    1.30
  12  -1  -7   26.49    2.19
  12  -1  -7   22.96    1.98
  12  -1  -7   25.56    1.93
  12   1  -7   23.17    1.98
  12   1  -7   21.88    1.86
  11  -1  -7    5.64    1.06
  11  -1  -7    5.70    0.89
  11  -1  -7    7.30    1.16
  11   1  -7    5.45    0.94
  11   1  -7    6.17    0.98
  10  -1  -7    5.07    1.01
  10  -1  -7    5.36    0.92
  10  -1  -7    4.38    0.78
  10   1  -7    6.63    0.86
  10   1  -7    5.64    0.88
   9  -1  -7    5.02    0.72
   9  -1  -7    2.33    1.04
   9  -1  -7    3.09    0.84
   9   1  -7    4.86    0.69
   9   1  -7    2.50    0.67
   8  -1  -7    3.40    0.55
   8   1  -7    4.28    0.88
   8   1  -7    2.74    0.65
   7  -1  -7   19.45    1.42
   7   1  -7   18.32    1.35
   7   1  -7   18.52    1.46
   6  -1  -7   11.21    0.93
   6   1  -7   10.20    0.87
   6   1  -7   10.00    1.02
   5  -1  -7   20.91    1.56
  -5   1   7   21.50    1.52
   5   1  -7   22.05    1.50
   4  -1  -7   24.40    1.74
  -4   1   7   25.53    1.70
   4   1  -7   23.67    1.67
   3  -1  -7   37.58    2.51
  -3   1   7   37.28    2.47
   3   1  -7   36.13    2.44
   2  -1  -7   48.17    3.23
  -2   1   7   47.48    3.19
   2   1  -7   49.40    3.17
   1  -1  -7   29.32    2.02
   1   1  -7   28.62    1.97
   0  -1  -7   82.36    5.27
   0   1  -7   79.62    5.24
  -1  -1  -7  165.18   10.62
  -1   1  -7  159.10   10.72
  -1   1  -7  171.74   10.60
  -2  -1  -7  162.85   10.40
  -2   1  -7  160.54   10.38
  -3  -1  -7   37.64    2.50
  -3   1  -7   31.37    2.45
   3   1   7   37.09    2.48
  -4  -1  -7    1.65    0.63
   4   1   7    0.63    0.62
  -4   1  -7    1.10    0.53
  -5  -1  -7    8.78    0.92
   5  -1   7    5.46    0.88
  -5   1  -7    8.42    0.92
  -6  -1  -7    6.11    1.01
  -6   1  -7    5.39    0.80
  -7   1  -7    4.61    0.83
  -7   1  -7    6.18    0.95
   7   1   7    3.04    1.26
   8   1   7    0.08    1.42
  -8   1  -7   -0.38    1.25
  -8   1  -7   -0.20    0.80
  -8   1  -7   -0.13    0.71
   8   1   7   -0.31    0.82
   9   1   7   10.65    1.91
   9   1   7   10.06    1.32
  -9   1  -7    9.03    1.25
  10   1   7    0.14    1.57
 -10   1  -7    0.26    0.94
  10   1   7    1.12    0.94
 -11   1  -7    0.10    0.92
  11   1   7   -0.44    0.87
  11   1   7   -0.27    1.54
  12  -1   7    2.87    1.50
  12   1   7    2.77    0.95
 -12   1  -7    1.67    0.90
  12   1   7    3.90    1.54
  13  -1   7    1.12    1.31
 -13   1  -7    0.78    0.77
  13   1   7   -0.12    0.74
  13   1   7   -0.41    1.13
  14  -1   7    1.31    1.00
  14   1   7    0.90    0.80
  14   1   7    1.49    0.64
 -14   1  -7    1.40    0.62
  15  -2  -7   -0.72    0.89
  15  -2  -7   -0.88    0.69
  15   2  -7   -0.66    0.76
  14  -2  -7    2.94    1.12
  14  -2  -7    2.87    0.83
  14   2  -7    3.24    1.03
  13  -2  -7    2.81    0.85
  13  -2  -7    1.89    1.09
  13   2  -7    1.70    1.00
  12  -2  -7    0.76    1.03
  12  -2  -7    0.91    0.72
  12   2  -7   -0.42    0.93
  11  -2  -7    1.60    0.97
  11  -2  -7    1.38    0.69
  11   2  -7    2.31    0.88
  10  -2  -7    5.00    1.05
  10  -2  -7    4.54    0.80
  10   2  -7    3.13    0.78
  10   2  -7    4.53    0.85
   9  -2  -7   43.61    3.05
   9   2  -7   40.02    2.92
   9   2  -7   42.28    2.91
   8  -2  -7   23.43    1.99
   8  -2  -7   23.47    1.76
   8   2  -7   24.80    1.85
   8   2  -7   24.62    1.87
   7  -2  -7    4.99    0.70
   7   2  -7    5.10    0.77
  -7   2   7    6.61    0.70
   6  -2  -7   25.38    1.80
   6   2  -7   24.61    1.86
  -6   2   7   24.57    1.74
   5  -2  -7   11.42    1.06
  -5   2   7   12.61    0.99
   5   2  -7   12.12    1.11
   4  -2  -7   25.95    1.86
   4   2  -7   26.53    1.86
  -4   2   7   24.88    1.81
   3  -2  -7    6.02    0.70
   3   2  -7    6.23    0.75
  -3   2   7    6.10    0.65
   2  -2  -7   11.09    0.99
  -2   2   7   10.60    0.96
   1  -2  -7   51.21    3.34
   1   2  -7   51.25    3.24
   1   2  -7   46.00    3.70
   0  -2  -7   11.07    1.02
   0   2  -7    8.91    1.38
   0   2  -7   11.13    0.87
   0   2   7   10.77    1.03
  -1  -2  -7    0.75    0.49
   1   2   7    1.09    0.59
  -1   2  -7    1.50    0.43
  -1   2  -7    1.82    0.97
   2   2   7    4.67    0.73
  -2   2  -7    5.55    0.64
  -2   2  -7    4.33    1.05
  -3   2  -7    5.85    1.06
  -4   2  -7   16.46    1.39
  -5   2  -7   30.62    2.23
  -5   2  -7   29.78    2.23
   6   2   7    9.19    1.75
  -6   2  -7    7.35    1.01
   6   2   7    9.97    1.18
  -6   2  -7    9.61    1.08
  -6   2  -7    9.42    1.38
   7   2   7   11.60    2.05
   7   2   7   16.32    1.61
   7   2   7   17.83    1.93
  -7   2  -7   21.04    1.61
  -7   2  -7   15.93    1.86
   8   2   7   10.53    1.55
  -8   2  -7   10.68    1.65
   8   2   7   11.03    1.94
  -8   2  -7   12.32    1.35
   8   2   7   10.32    1.33
   9   2   7    3.22    0.98
   9   2   7    2.45    1.17
  -9   2  -7    2.67    0.99
  -9   2  -7    4.47    1.34
   9   2   7    5.31    1.66
 -10   2  -7    5.63    1.32
 -10   2  -7    7.49    1.14
  10   2   7    8.15    1.14
  10   2   7    6.42    1.28
  10   2   7    5.11    1.61
  11   2   7    7.24    1.03
  11   2   7    4.77    1.41
 -11   2  -7    5.82    1.04
  12   2   7    5.35    0.87
 -12   2  -7    3.23    0.85
  12   2   7    4.79    1.09
 -13   2  -7    1.20    0.60
  13   2   7    1.96    0.58
  14  -3  -7    3.06    0.97
  14  -3  -7    4.62    0.81
  14   3  -7    2.17    0.77
  13  -3  -7   16.14    1.66
  12  -3  -7    4.17    1.10
  12   3  -7    4.20    1.03
  11  -3  -7    1.96    0.99
  11   3  -7    1.38    0.85
  11   3  -7    2.80    0.91
  10  -3  -7   16.13    1.62
  10   3  -7   15.82    1.48
  10   3  -7   13.17    1.38
   9  -3  -7    9.93    1.28
   9   3  -7    9.03    1.12
  -8   3   7    9.07    0.88
   8   3  -7    8.99    1.09
  -7   3   7   12.98    1.06
   7   3  -7   12.44    1.25
  -7   3   7   11.56    1.07
  -6   3   7   13.77    1.19
  -6   3   7   14.03    1.19
   6   3  -7   16.53    1.36
  -5   3   7   49.25    3.33
  -5   3   7   46.98    3.83
  -5   3   7   48.42    3.32
   5   3  -7   53.22    3.41
  -4   3   7   18.61    1.41
  -4   3   7   18.24    1.42
   4   3  -7   19.00    1.53
   3   3  -7   14.40    1.24
  -3   3   7   13.23    1.12
   2   3  -7    7.87    0.96
  -2   3   7    8.92    0.86
  -1   3   7    0.29    0.47
   1   3  -7    0.05    0.60
   1   3  -7   -0.16    1.08
   0   3  -7   23.13    2.30
  -1   3  -7   54.73    4.49
   1   3   7   68.82    4.28
  -2   3  -7   14.52    1.96
  -2   3  -7   14.52    1.22
   2   3   7   14.78    1.30
   3   3   7    2.55    1.46
  -3   3  -7    2.47    1.25
   3   3   7    2.81    0.73
  -3   3  -7    3.43    0.48
  -3   3  -7    2.79    0.62
   4   3   7    3.21    0.81
  -4   3  -7    3.85    0.67
  -4   3  -7    1.75    1.24
   4   3   7    2.60    0.95
   4   3   7    3.36    1.42
  -4   3  -7    2.53    0.91
  -4   3  -7    3.29    0.70
  -5   3  -7    2.65    0.75
  -5   3  -7    4.48    0.79
   5   3   7    4.70    1.04
   5   3   7    4.16    0.91
  -5   3  -7    2.17    1.05
   5   3   7    0.85    1.54
   6   3   7    4.28    1.71
  -6   3  -7    6.91    1.29
   6   3   7    5.48    1.06
  -6   3  -7    8.29    0.96
   6   3   7    4.57    1.18
   7   3   7    0.72    1.51
   7   3   7    0.03    0.87
  -7   3  -7    0.72    0.75
  -7   3  -7    1.32    1.16
   7   3   7   -0.51    0.97
   8   3   7    2.54    1.43
  -8   3  -7    3.02    0.81
  -8   3  -7   -0.79    1.09
   8   3   7    1.55    0.91
   8   3   7    0.81    0.99
  -9   3  -7   12.70    1.57
  -9   3  -7   11.89    1.27
   9   3   7   12.71    1.36
   9   3   7   11.97    1.64
   9   3   7   11.18    1.46
  10   3   7    3.47    1.02
  10   3   7    5.68    0.82
 -10   3  -7    5.63    1.09
 -10   3  -7    4.78    0.83
 -11   3  -7    2.27    0.78
  11   3   7    2.04    0.86
  11   3   7    2.42    0.57
 -11   3  -7    2.42    0.65
 -12   3  -7    0.47    0.49
  12   3   7    0.35    0.33
  12   3   7    0.41    0.65
  13  -4  -7    1.82    0.99
  12  -4  -7   -0.12    0.91
 -12   4   7    0.75    0.52
  11  -4  -7    0.24    1.10
 -11   4   7    0.18    0.48
 -11   4   7    0.48    0.55
 -10   4   7    3.58    0.65
   9   4  -7   11.69    1.36
  -9   4   7   12.29    1.07
  -8   4   7    7.28    0.80
   8   4  -7    5.97    1.01
  -7   4   7    0.24    0.48
   7   4  -7    0.94    0.76
  -6   4   7    9.65    1.07
   6   4  -7    9.50    1.13
  -6   4   7    9.35    0.89
  -5   4   7    0.60    0.61
  -5   4   7    0.50    0.45
   5   4  -7   -0.20    0.75
  -4   4   7   19.78    1.58
  -4   4   7   18.72    1.47
   4   4  -7   20.64    1.71
  -3   4   7    6.07    0.68
   3   4  -7    4.71    0.87
  -3   4   7    4.23    0.73
  -2   4   7   11.20    1.13
  -2   4   7   10.93    1.09
  -2   4   7   11.93    0.98
   2   4  -7    9.77    1.20
  -1   4   7    8.96    0.94
  -1   4   7   10.92    1.09
   1   4  -7   11.16    1.80
  -1   4   7   10.23    0.93
   0   4   7    0.13    0.45
   0   4   7    0.43    0.59
   0   4   7   -0.48    0.43
   0   4  -7   -1.23    1.36
   1   4   7    1.29    0.66
   1   4   7    2.19    0.55
  -1   4  -7    0.71    1.41
   2   4   7    3.08    0.78
  -2   4  -7    4.49    1.52
  -2   4  -7    1.99    0.76
   2   4   7    2.74    0.65
  -3   4  -7    6.49    0.99
   3   4   7    5.46    0.94
  -3   4  -7    4.58    1.61
   3   4   7    6.95    0.88
  -4   4  -7   12.00    1.41
   4   4   7   12.57    1.28
  -4   4  -7   11.70    1.94
   4   4   7   16.35    1.49
   5   4   7   21.14    1.90
   5   4   7   20.09    1.73
  -5   4  -7   22.17    1.92
  -6   4  -7   18.09    1.80
   6   4   7   13.09    1.57
   6   4   7   14.74    1.36
   7   4   7    3.97    1.00
  -7   4  -7    5.86    1.18
   7   4   7    3.93    0.71
   8   4   7    3.89    0.56
   8   4   7    1.98    0.89
  -8   4  -7    3.66    1.07
   9   4   7    0.18    0.75
  -9   4  -7    0.99    0.85
  10   4   7    1.30    0.67
 -10   4  -7    1.22    0.71
  11   4   7   -0.41    0.50
 -11   4  -7   -0.36    0.49
 -10   5   7   16.27    1.20
  -9   5   7   18.96    1.31
  -9   5   7   16.96    1.28
  -8   5   7   16.86    1.26
  -7   5   7    6.42    0.85
  -7   5   7    7.13    0.70
  -6   5   7   12.40    1.13
  -6   5   7   11.91    0.97
  -5   5   7   14.67    1.32
  -5   5   7   15.79    1.16
  -4   5   7   14.27    1.14
  -4   5   7   16.39    1.30
  -3   5   7   23.39    1.80
  -3   5   7   24.47    1.69
  -2   5   7    0.63    0.51
  -2   5   7    0.53    0.42
  -1   5   7    2.70    0.50
  -1   5   7    2.92    0.63
   0   5   7   -0.18    0.43
   0   5   7    0.22    0.56
   1   5   7    3.93    0.72
   1   5   7    4.59    0.57
  -2   5  -7    0.07    0.91
   2   5   7   -0.20    0.34
   2   5   7    0.55    0.59
  -3   5  -7    2.25    0.82
   3   5   7    2.45    0.69
   4   5   7    7.54    0.98
  -4   5  -7   10.52    1.20
  -5   5  -7    2.11    0.86
   5   5   7    1.65    0.65
  -6   5  -7    0.09    0.80
   6   5   7    0.94    0.61
  -7   5  -7    1.53    0.76
   7   5   7    1.33    0.58
   8   5   7    1.78    0.53
  -8   5  -7    1.25    0.66
   9   5   7    1.30    0.45
  -9   5  -7    2.56    0.56
  -6   6   7    0.12    0.43
  -5   6   7    1.39    0.47
  -4   6   7    0.71    0.44
  -3   6   7    1.78    0.48
  -2   6   7   -0.34    0.42
  -1   6   7    0.51    0.42
   0   6   7    0.88    0.43
   1   6   7    1.12    0.45
   2   6   7    0.81    0.44
   3   6   7   -0.31    0.43
   4   6   7    3.74    0.54
  16   0  -8    2.57    0.86
  16   0  -8    0.60    0.87
  15   0  -8    2.55    0.94
  14   0  -8    1.40    0.81
  14   0  -8    0.32    0.94
  13   0  -8   -0.06    0.91
  13   0  -8    0.61    0.76
  12   0  -8   12.68    1.45
  12   0  -8   14.47    1.40
  12   0  -8   15.87    1.69
  11   0  -8   13.08    1.21
  11   0  -8   10.78    1.48
  11   0  -8   12.27    1.28
  10   0  -8   15.38    1.28
  10   0  -8   13.31    1.49
  10   0  -8   16.35    1.37
   9   0  -8   31.69    2.14
   9   0  -8   28.03    2.15
   9   0  -8   30.53    2.27
   8   0  -8   28.93    2.03
   8   0  -8   29.42    2.03
   7   0  -8   12.01    1.02
   6   0  -8   -0.10    0.42
   5   0  -8   30.94    2.12
   4   0  -8   15.94    1.23
   3   0  -8   23.54    1.68
   2   0  -8    0.25    0.46
   1   0  -8    2.54    0.50
   0   0  -8    3.92    0.56
  -1   0  -8   15.24    1.24
  -2   0  -8    5.75    0.77
  -3   0  -8   87.87    5.76
  -4   0  -8   54.57    3.69
  -5   0  -8   51.94    3.54
  -6   0  -8   24.56    1.91
  -7   0  -8    6.94    0.97
  -8   0  -8   13.81    1.46
   9   0   8   29.95    3.04
  10   0   8   15.94    2.22
  11   0   8   -0.05    1.51
  12   0   8    2.24    1.45
  13   0   8    0.12    0.68
  13   0   8    0.52    1.18
  14   0   8   -0.17    0.83
  16   1  -8    1.39    0.73
  15  -1  -8    2.45    0.79
  15   1  -8    1.01    0.90
  14  -1  -8    7.42    1.01
  14  -1  -8    4.26    1.17
  14   1  -8    5.11    1.08
  13  -1  -8    0.28    0.77
  13  -1  -8   -0.03    0.95
  13  -1  -8   -0.19    1.04
  13   1  -8   -0.14    0.89
  12  -1  -8    1.58    0.77
  12  -1  -8   -0.41    1.01
  12  -1  -8    0.20    0.93
  12   1  -8   -0.13    0.89
  12   1  -8    0.17    0.67
  11  -1  -8   -0.63    0.89
  11  -1  -8    0.62    0.87
  11  -1  -8   -0.17    0.67
  11   1  -8   -0.26    0.77
  11   1  -8    0.01    0.67
  10  -1  -8    0.19    0.62
  10  -1  -8    0.91    0.86
  10  -1  -8   -0.21    0.79
  10   1  -8    1.01    0.70
  10   1  -8    0.48    0.60
   9  -1  -8   15.59    1.36
   9  -1  -8   19.03    1.42
   9  -1  -8   19.56    1.60
   9  -1  -8   17.92    1.48
   9   1  -8   17.22    1.38
   9   1  -8   16.24    1.42
   8  -1  -8   19.06    1.45
   8  -1  -8   19.62    1.47
   8   1  -8   20.18    1.52
   8   1  -8   17.53    1.40
   7  -1  -8   50.51    3.39
   7   1  -8   49.86    3.34
   7   1  -8   52.05    3.43
   6  -1  -8  138.88    9.01
   6   1  -8  139.86    8.96
   6   1  -8  140.67    9.03
   5  -1  -8   95.43    6.39
   5   1  -8  101.65    6.35
   4  -1  -8   36.28    2.47
   4   1  -8   35.87    2.39
   3  -1  -8    3.25    0.57
  -3   1   8    3.10    0.51
   3   1  -8    3.25    0.48
   2  -1  -8    4.30    0.64
   2   1  -8    4.28    0.55
  -2   1   8    5.00    0.61
   1  -1  -8   30.91    2.15
   1   1  -8   30.99    2.12
   0  -1  -8    9.46    0.96
   0   1  -8    9.39    0.90
  -1  -1  -8   17.15    1.36
  -1   1  -8   16.81    1.32
  -2  -1  -8   56.35    3.67
  -2   1  -8   53.06    3.64
  -3  -1  -8   48.62    3.16
  -3   1  -8   43.57    3.11
  -4  -1  -8    0.58    0.64
  -4   1  -8    1.25    0.57
  -5  -1  -8    7.38    0.94
  -5   1  -8    8.43    0.94
  -6   1  -8    3.63    0.78
  -6   1  -8    3.10    0.85
  -7   1  -8    9.03    1.13
  -7   1  -8   10.21    1.50
  -7   1  -8    9.78    1.20
   7   1   8   12.59    1.86
  -8   1  -8    9.54    1.56
   8   1   8   11.44    1.66
   8   1   8   10.47    1.87
  -8   1  -8    9.05    1.20
   9   1   8   15.15    2.08
   9   1   8   10.59    1.38
  -9   1  -8   12.54    1.42
  10   1   8    4.66    1.74
 -10   1  -8    6.15    1.10
  10   1   8    4.83    1.05
 -11   1  -8    0.52    0.90
  11   1   8    2.04    0.90
  11   1   8    2.49    1.61
  12  -1   8   -0.34    1.31
 -12   1  -8   -0.23    0.75
  12   1   8    0.25    0.78
  12   1   8    0.23    1.29
  13  -1   8   -0.64    1.07
  13   1   8   -0.08    0.65
 -13   1  -8   -0.19    0.63
  13   1   8    0.03    1.04
  14  -1   8    0.15    0.86
  15  -2  -8    2.34    0.87
  15  -2  -8    2.65    0.73
  15   2  -8    1.61    0.77
  14  -2  -8    0.08    0.98
  14  -2  -8    0.88    0.72
  14   2  -8   -0.08    0.88
  13  -2  -8   10.40    1.21
  13  -2  -8   12.62    1.52
  13   2  -8   10.71    1.31
  12  -2  -8   11.20    1.19
  12  -2  -8   13.95    1.60
  12   2  -8   11.70    1.34
  11  -2  -8   15.41    1.64
  11  -2  -8   15.71    1.38
  11   2  -8   14.20    1.42
  10  -2  -8    8.10    1.19
  10  -2  -8    7.00    0.89
  10   2  -8    5.97    0.90
  10   2  -8    6.45    0.94
   9  -2  -8   10.07    1.30
   9  -2  -8   15.33    1.43
   9  -2  -8   11.64    1.13
   9   2  -8   12.69    1.15
   9   2  -8   12.52    1.21
   8  -2  -8   10.27    1.21
   8  -2  -8    8.33    0.89
   8  -2  -8    7.95    1.18
   8   2  -8    7.27    0.82
   8   2  -8    8.38    0.99
   7  -2  -8    2.67    0.65
   7   2  -8    2.47    0.68
   6  -2  -8    0.52    0.55
   6   2  -8    1.47    0.65
  -6   2   8    0.45    0.43
   5  -2  -8    8.31    0.94
   5   2  -8   10.47    0.99
  -5   2   8    7.53    0.84
   4  -2  -8   25.13    1.78
  -4   2   8   24.47    1.74
   4   2  -8   23.00    1.80
   3  -2  -8   39.69    2.65
  -3   2   8   37.38    2.61
   3   2  -8   38.42    2.68
   2  -2  -8   30.79    2.22
  -2   2   8   31.58    2.20
   2   2  -8   32.59    2.26
   1  -2  -8   44.69    3.16
   1   2  -8   48.42    3.06
   0  -2  -8   13.72    1.23
   0   2   8   13.96    1.25
   0   2  -8   13.85    1.76
   0   2  -8   15.83    1.11
  -1  -2  -8   25.48    1.81
  -1   2  -8   22.67    2.21
   1   2   8   23.19    1.82
  -1   2  -8   25.48    1.72
  -2   2  -8   10.16    0.98
  -3   2  -8   18.65    1.49
  -4   2  -8   25.47    1.98
  -4   2  -8   27.56    1.99
  -5   2  -8   28.41    2.23
  -5   2  -8   26.47    2.01
   5   2   8   27.89    2.13
   5   2   8   26.58    2.68
  -5   2  -8   23.16    1.96
   6   2   8   18.91    2.29
   6   2   8   19.55    1.87
   6   2   8   16.44    1.68
  -6   2  -8   15.79    1.56
  -6   2  -8   19.25    1.87
  -6   2  -8   16.48    1.57
  -7   2  -8    1.92    0.86
   7   2   8    3.70    1.16
   7   2   8    2.73    1.56
  -7   2  -8    1.65    1.20
   7   2   8    1.94    0.90
  -8   2  -8    6.52    1.38
  -8   2  -8    6.31    1.06
   8   2   8    7.29    1.53
   8   2   8    6.52    1.73
   8   2   8    6.67    1.14
  -9   2  -8    6.08    1.05
   9   2   8    6.52    1.09
   9   2   8    6.31    1.71
  -9   2  -8    5.98    1.33
  10   2   8    6.88    1.05
 -10   2  -8    4.18    1.17
  10   2   8    4.74    1.57
 -10   2  -8    6.00    0.99
 -11   2  -8    0.43    0.78
  11   2   8    0.36    0.76
  11   2   8    1.04    1.16
  12   2   8    2.06    0.69
  12   2   8    3.16    0.96
 -12   2  -8    2.76    0.71
 -13   2  -8    1.74    0.54
  13   2   8    2.62    0.53
  14  -3  -8    3.57    0.94
  14   3  -8    3.21    0.73
  13  -3  -8    5.46    0.87
  13  -3  -8    3.96    1.09
  13   3  -8    3.70    0.88
  12  -3  -8    6.63    1.18
  12   3  -8    7.69    1.09
  11  -3  -8   13.35    1.51
  11   3  -8   13.11    1.33
  11   3  -8   11.50    1.25
  10  -3  -8    7.78    1.20
  10   3  -8    5.71    0.96
  10   3  -8    5.54    0.94
   9  -3  -8    3.05    0.98
   9   3  -8    1.47    0.77
   8  -3  -8    2.35    1.00
   8   3  -8    2.60    0.78
  -7   3   8   12.45    1.35
   7   3  -8   12.06    1.22
   6   3  -8   27.98    2.03
  -6   3   8   26.10    1.92
  -6   3   8   25.88    1.92
   5   3  -8   14.31    1.29
  -5   3   8   14.17    1.17
  -5   3   8   12.86    1.17
   4   3  -8    1.89    0.66
  -4   3   8    1.39    0.51
  -4   3   8    1.12    0.49
  -3   3   8    3.09    0.54
   3   3  -8    1.02    0.66
  -3   3   8    1.68    0.50
   2   3  -8    0.17    0.68
  -2   3   8    0.96    0.45
  -2   3   8    1.01    0.52
  -1   3   8    0.23    0.54
   1   3  -8    1.37    0.70
  -1   3   8    0.43    0.48
   0   3  -8    6.98    1.44
   0   3   8    5.37    0.70
   0   3   8    7.74    0.84
  -1   3  -8    4.81    1.38
   1   3   8    5.12    1.61
   1   3   8    6.16    0.79
   2   3   8   39.29    2.98
  -2   3  -8   32.61    3.12
  -2   3  -8   33.30    2.76
   2   3   8   42.03    2.79
   2   3   8   38.60    2.66
   3   3   8   13.69    1.46
  -3   3  -8    8.68    1.67
   3   3   8   12.90    1.67
  -3   3  -8   12.13    1.14
  -3   3  -8   12.52    1.31
   3   3   8   12.74    1.26
  -4   3  -8    2.63    0.53
  -4   3  -8    0.99    0.67
   4   3   8    1.95    1.36
   4   3   8    1.62    0.78
   4   3   8    0.97    0.91
  -4   3  -8    0.64    0.95
   5   3   8   -0.08    1.51
   5   3   8    1.04    0.81
  -5   3  -8    1.25    1.04
  -5   3  -8    1.22    0.64
   5   3   8    2.19    0.94
  -6   3  -8    1.12    1.12
   6   3   8    2.16    0.97
   6   3   8    1.59    1.55
   6   3   8   -0.03    0.81
  -6   3  -8    1.48    0.69
   7   3   8    8.47    1.74
  -7   3  -8    7.54    1.42
   7   3   8    6.21    1.08
   7   3   8    6.02    1.16
  -7   3  -8    8.56    0.97
   8   3   8    1.77    1.34
  -8   3  -8    1.58    0.73
   8   3   8    1.90    0.95
   8   3   8    2.28    0.87
  -8   3  -8    3.14    1.18
  -9   3  -8    4.32    0.74
  -9   3  -8    2.54    1.06
   9   3   8    2.09    0.94
   9   3   8    3.80    1.08
   9   3   8    3.45    0.81
  10   3   8    2.68    0.84
 -10   3  -8    1.68    0.85
 -10   3  -8    1.91    0.64
  10   3   8    2.86    0.67
  11   3   8    0.99    0.46
 -11   3  -8    0.50    0.49
 -11   3  -8    0.81    0.64
  11   3   8   -0.46    0.67
 -12   3  -8    0.65    0.45
  12  -4  -8    6.02    1.01
 -12   4   8    4.36    0.64
  11  -4  -8    4.10    0.97
 -11   4   8    2.29    0.52
 -11   4   8    2.85    0.57
 -10   4   8    2.16    0.56
   9   4  -8    1.91    0.83
  -9   4   8    1.18    0.51
  -8   4   8   -0.04    0.47
   8   4  -8    0.14    0.75
   7   4  -8    1.04    0.75
  -7   4   8    1.75    0.50
  -6   4   8    9.24    0.89
   6   4  -8    9.31    1.11
  -5   4   8    1.88    0.64
  -5   4   8    1.56    0.52
   5   4  -8    0.67    0.74
  -4   4   8    7.07    0.86
   4   4  -8    7.88    1.03
  -4   4   8    7.38    0.78
   3   4  -8   18.90    1.63
  -3   4   8   17.51    1.36
  -3   4   8   16.46    1.45
  -2   4   8   51.53    3.46
   2   4  -8   51.65    3.62
  -2   4   8   52.09    3.55
  -1   4   8   36.77    2.59
  -1   4   8   35.33    2.48
   0   4  -8   27.46    2.89
   0   4   8   27.40    2.01
   0   4   8   29.70    2.14
   1   4   8    2.46    0.60
   1   4   8    2.12    0.70
  -1   4  -8    0.09    1.39
  -2   4  -8    4.05    0.90
   2   4   8    2.77    0.79
   2   4   8    3.60    0.72
  -2   4  -8    5.03    1.71
  -3   4  -8   -0.74    1.45
   3   4   8    0.63    0.75
  -3   4  -8    0.63    0.85
   3   4   8   -0.17    0.65
   4   4   8    2.82    0.80
  -4   4  -8    2.28    0.98
   4   4   8    2.82    0.83
   5   4   8    2.44    0.81
  -5   4  -8    2.44    1.05
   5   4   8    2.37    0.84
   6   4   8   -0.23    0.76
   6   4   8   -0.17    0.67
  -6   4  -8    1.97    1.04
   7   4   8    1.12    0.75
   7   4   8    1.75    0.61
  -7   4  -8    1.95    1.02
   8   4   8    0.31    0.71
   8   4   8    1.21    0.44
  -8   4  -8    1.17    0.90
  -9   4  -8    0.39    0.75
   9   4   8    0.29    0.61
 -10   4  -8    0.59    0.59
  10   4   8    0.32    0.51
 -10   5   8    3.21    0.47
  -9   5   8   -0.04    0.39
  -9   5   8   -0.02    0.33
  -8   5   8    0.56    0.40
  -7   5   8    1.91    0.43
  -6   5   8    1.15    0.42
  -6   5   8    0.74    0.55
  -5   5   8    0.62    0.39
  -5   5   8    0.24    0.52
  -4   5   8    1.36    0.41
  -4   5   8    0.21    0.51
   4   5  -8    1.17    0.98
  -3   5   8    6.82    0.77
  -3   5   8    5.96    0.66
  -2   5   8    4.74    0.57
  -2   5   8    4.31    0.66
  -1   5   8    3.87    0.57
  -1   5   8    3.14    0.63
   0   5   8    5.45    0.64
   0   5   8    4.00    0.70
   1   5   8    3.73    0.56
   1   5   8    4.14    0.70
   2   5   8   11.74    1.16
   2   5   8   11.20    0.92
  -3   5  -8    5.48    0.92
   3   5   8    5.45    0.53
   3   5   8    4.56    0.76
  -4   5  -8    0.50    0.76
   4   5   8    0.79    0.59
   5   5   8    0.65    0.57
  -5   5  -8    1.43    0.78
  -6   5  -8    0.18    0.70
   6   5   8    0.50    0.54
  -7   5  -8    1.70    0.67
   7   5   8    2.46    0.55
  -8   5  -8    3.32    0.60
   8   5   8    2.34    0.49
  -5   6   8    0.26    0.42
  -4   6   8    0.83    0.42
  -3   6   8    8.96    0.81
  -2   6   8    5.70    0.65
  -1   6   8   12.07    0.99
   0   6   8    6.30    0.69
   1   6   8    1.12    0.40
   2   6   8    1.30    0.41
   3   6   8    0.58    0.38
  15   0  -9    8.95    1.16
  14   0  -9    2.53    0.72
  14   0  -9    1.78    0.94
  13   0  -9    1.16    0.76
  13   0  -9    1.21    0.93
  12   0  -9   11.31    1.19
  12   0  -9    9.31    1.27
  11   0  -9   51.86    3.59
  11   0  -9   51.17    3.53
  11   0  -9   51.58    3.65
  10   0  -9    1.09    0.73
  10   0  -9    2.27    0.85
  10   0  -9    0.98    0.63
   9   0  -9    2.76    0.69
   9   0  -9    3.52    0.80
   9   0  -9    2.31    0.57
   9   0  -9    4.01    0.65
   8   0  -9    1.15    0.53
   8   0  -9    0.68    0.51
   8   0  -9    1.02    0.69
   8   0  -9    1.50    0.60
   7   0  -9    7.98    0.78
   7   0  -9    7.78    0.84
   6   0  -9   27.69    1.94
   5   0  -9   29.40    2.04
   4   0  -9   25.05    1.78
   3   0  -9  132.35    8.53
   2   0  -9  170.50   10.95
   1   0  -9   35.40    2.43
   0   0  -9   19.90    1.50
  -1   0  -9    6.47    0.77
  -2   0  -9   60.07    4.02
  -3   0  -9   97.05    6.36
  -4   0  -9    0.03    0.60
  -5   0  -9   22.20    1.67
  -5   0  -9   19.03    1.75
  -6   0  -9    0.99    0.79
  -6   0  -9    0.60    0.66
  -7   0  -9   -0.32    0.77
  -7   0  -9   -0.61    0.68
  -8   0  -9   -0.13    0.81
  -9   0  -9    0.56    1.02
   9   0   9    1.01    1.46
  10   0   9    2.58    1.55
  11   0   9    4.75    1.58
  12   0   9    1.70    1.32
  13   0   9    2.13    1.05
  15  -1  -9    4.75    0.80
  15   1  -9    3.90    0.91
  14  -1  -9    9.79    1.23
  14  -1  -9    9.29    1.06
  14   1  -9    7.42    1.16
  13  -1  -9   24.12    2.00
  13  -1  -9   26.00    2.11
  13  -1  -9   30.79    2.22
  13   1  -9   24.15    2.11
  12  -1  -9   19.57    1.78
  12  -1  -9   17.67    1.53
  12  -1  -9   16.69    1.61
  12   1  -9   18.01    1.62
  11  -1  -9   15.61    1.56
  11  -1  -9   19.00    1.68
  11  -1  -9   16.81    1.45
  11   1  -9   16.03    1.53
  10  -1  -9    5.73    0.97
  10  -1  -9    6.39    1.07
  10  -1  -9    5.31    0.83
  10   1  -9    5.28    0.72
  10   1  -9    5.74    0.87
   9  -1  -9    0.60    0.53
   9  -1  -9    1.13    0.80
   9  -1  -9    1.39    0.62
   9  -1  -9    1.87    0.75
   9   1  -9    1.94    0.54
   9   1  -9    0.67    0.74
   9   1  -9    0.51    0.60
   8  -1  -9    4.67    0.70
   8  -1  -9    6.34    1.00
   8  -1  -9    5.08    0.76
   8  -1  -9    6.13    0.80
   8   1  -9    5.14    0.79
   8   1  -9    6.32    0.66
   8   1  -9    4.71    0.71
   7  -1  -9    0.37    0.55
   7  -1  -9    0.77    0.51
   7   1  -9    1.15    0.61
   7   1  -9    0.51    0.44
   7   1  -9    0.91    0.42
   6  -1  -9   18.22    1.36
   6   1  -9   17.60    1.42
   6   1  -9   16.23    1.27
   5  -1  -9   31.54    2.31
   5   1  -9   34.45    2.24
   4  -1  -9   37.69    2.64
   4   1  -9   39.03    2.56
   3  -1  -9   19.75    1.57
   3   1  -9   22.01    1.51
   2  -1  -9    7.84    0.83
   2   1  -9    7.91    0.82
   1  -1  -9    7.52    0.78
   1   1  -9    6.56    0.72
   0  -1  -9   13.83    1.27
   0   1  -9   15.99    1.22
  -1  -1  -9   45.12    2.99
  -1   1  -9   42.27    2.95
  -2  -1  -9   14.39    1.31
  -2   1  -9   15.03    1.25
  -3  -1  -9    4.70    0.77
  -3   1  -9    4.28    0.71
  -4  -1  -9    4.66    0.78
  -4   1  -9    3.77    0.72
  -4   1  -9    4.35    0.77
  -5  -1  -9    3.66    0.81
  -5   1  -9    5.83    0.85
  -5   1  -9    4.66    0.78
   6   1   9    1.65    1.41
  -6   1  -9    1.65    0.78
  -6   1  -9    1.05    0.98
  -6   1  -9    0.82    0.71
   7   1   9    2.85    1.53
  -7   1  -9    3.04    1.03
  -7   1  -9    2.22    0.90
  -7   1  -9    2.92    1.15
  -8   1  -9   11.85    1.56
   8   1   9   14.27    1.98
  -8   1  -9    9.28    1.23
   9   1   9    5.22    1.04
   9   1   9   11.03    1.83
  -9   1  -9    4.27    0.99
  10   1   9   12.75    1.90
 -10   1  -9    4.27    1.05
  10   1   9    7.51    1.10
  11   1   9    7.03    1.09
  11   1   9   10.55    1.74
 -11   1  -9    6.50    1.05
  12  -1   9    4.09    1.37
  12   1   9    5.38    1.33
 -12   1  -9    4.09    0.86
  12   1   9    6.48    0.90
  13  -1   9    3.90    1.11
 -13   1  -9    2.80    0.63
  13   1   9    4.76    0.71
  13   1   9    3.30    0.97
  15  -2  -9    2.75    0.75
  15   2  -9    1.63    0.75
  15   2  -9    1.71    0.74
  14  -2  -9    0.82    0.93
  14  -2  -9    1.24    0.72
  14   2  -9    0.23    0.79
  13  -2  -9    0.73    0.74
  13  -2  -9   -0.33    0.94
  13   2  -9    0.27    0.85
  12  -2  -9   12.20    1.18
  12  -2  -9   10.35    1.45
  12   2  -9   10.94    1.28
  11  -2  -9    1.68    0.74
  11  -2  -9    1.09    0.98
  11   2  -9    2.09    0.83
  10  -2  -9    1.20    0.95
  10  -2  -9    2.20    0.68
  10   2  -9    1.61    0.70
  10   2  -9    0.26    0.69
   9  -2  -9   26.96    2.03
   9  -2  -9   22.20    1.76
   9   2  -9   22.14    1.74
   9   2  -9   22.77    1.81
   8  -2  -9   24.12    1.78
   8  -2  -9   22.22    1.77
   8  -2  -9   25.25    2.04
   8   2  -9   24.67    1.81
   8   2  -9   21.39    1.69
   7  -2  -9   15.36    1.54
   7  -2  -9   14.80    1.29
   7  -2  -9   16.09    1.31
   7   2  -9   16.19    1.37
   7   2  -9   13.10    1.17
   6  -2  -9   11.75    1.16
   6   2  -9   13.20    1.22
   5  -2  -9   38.96    2.82
   5   2  -9   43.08    2.87
   4  -2  -9   13.16    1.12
  -4   2   9   11.54    1.06
   4   2  -9   11.04    1.14
   3  -2  -9   58.25    3.84
   3   2  -9   56.89    3.87
  -3   2   9   56.71    3.80
   2  -2  -9   22.78    1.71
   2   2  -9   23.26    1.76
  -2   2   9   22.70    1.69
   1  -2  -9   47.70    3.35
   1   2  -9   50.77    3.25
   0  -2  -9   51.55    3.58
   0   2  -9   54.32    3.49
  -1  -2  -9   14.88    1.23
  -1   2  -9   12.29    1.10
  -2   2  -9   25.47    1.89
  -2   2  -9   27.77    2.03
   3   2   9   24.29    1.93
  -3   2  -9   25.17    1.76
  -3   2  -9   21.52    1.76
  -4   2  -9    1.58    0.68
  -4   2  -9    2.63    0.74
  -4   2  -9    1.92    0.89
   4   2   9    3.17    0.85
   4   2   9    2.70    1.37
  -5   2  -9   13.65    1.36
   5   2   9   12.95    1.48
  -5   2  -9   14.51    1.58
   5   2   9   14.59    1.99
  -5   2  -9   14.78    1.33
  -6   2  -9   20.37    1.90
  -6   2  -9   19.07    1.60
   6   2   9   16.94    2.33
   6   2   9   17.27    1.71
  -7   2  -9    6.59    0.99
   7   2   9    4.20    1.69
  -7   2  -9    4.44    1.25
   7   2   9    6.22    1.01
  -8   2  -9    0.17    0.79
  -8   2  -9   -0.11    1.07
   8   2   9    0.18    1.49
   8   2   9    0.71    0.83
   9   2   9   -0.36    0.80
   9   2   9    1.13    1.46
  -9   2  -9    0.59    1.04
  -9   2  -9    0.63    0.78
  10   2   9   -0.60    0.75
  10   2   9    0.04    1.23
 -10   2  -9    0.48    1.27
 -10   2  -9   -0.46    0.72
 -11   2  -9   -0.40    0.65
  11   2   9    1.11    0.74
  11   2   9    0.41    1.05
 -12   2  -9    0.19    0.53
  12   2   9    0.19    0.55
  12   2   9    1.19    0.78
  14  -3  -9    1.99    0.80
  13  -3  -9    5.23    1.03
  13  -3  -9    4.43    0.78
  13   3  -9    4.08    0.81
  12  -3  -9    7.77    0.95
  12  -3  -9    7.05    1.16
  12   3  -9    7.40    1.03
  11  -3  -9    2.15    0.95
  11   3  -9    2.11    0.79
  11   3  -9    1.94    0.74
  10  -3  -9    1.19    0.95
  10   3  -9    0.88    0.71
   9  -3  -9   10.33    1.35
   9   3  -9    9.04    1.09
   8  -3  -9   -0.07    0.92
   8   3  -9    0.98    0.72
   7  -3  -9    2.58    1.01
   7   3  -9    2.73    0.76
   6   3  -9    5.88    0.86
  -5   3   9   20.65    1.70
  -5   3   9   22.78    1.72
   5   3  -9   26.02    1.84
   4   3  -9    3.51    0.76
  -4   3   9    2.74    0.58
  -4   3   9    2.74    0.55
   3   3  -9    5.83    0.89
  -3   3   9    4.14    0.64
  -3   3   9    5.18    0.67
  -2   3   9    6.87    0.82
  -2   3   9    8.34    0.89
   2   3  -9    8.48    1.03
  -1   3   9    5.02    0.69
  -1   3   9    6.79    0.78
   1   3  -9    5.52    0.94
  -1   3   9    5.83    0.80
   0   3   9   13.65    1.25
   0   3   9   11.16    1.13
   0   3   9   15.73    1.35
   0   3   9   16.37    1.70
   1   3   9   29.35    2.44
   1   3   9   30.94    2.19
   1   3   9   26.73    2.05
  -1   3  -9   27.18    2.13
  -1   3  -9   25.06    2.65
   2   3   9   12.43    1.35
   2   3   9   13.10    1.69
  -2   3  -9   10.55    1.29
   2   3   9   11.06    1.17
   3   3   9   22.44    2.26
  -3   3  -9   19.65    1.82
   3   3   9   18.30    1.69
   3   3   9   21.19    1.81
   4   3   9    3.02    0.82
  -4   3  -9    4.35    1.05
   4   3   9    4.23    1.45
  -4   3  -9    2.86    0.46
   4   3   9    3.23    0.94
   5   3   9    3.38    1.56
   5   3   9    5.51    0.94
  -5   3  -9    4.39    0.63
  -5   3  -9    6.02    1.20
   5   3   9    4.53    1.04
   6   3   9    5.46    1.63
   6   3   9    4.54    0.93
  -6   3  -9    4.60    0.70
  -6   3  -9    6.09    1.26
   6   3   9    4.19    1.03
   7   3   9    1.38    1.42
  -7   3  -9    2.21    1.15
  -7   3  -9    1.47    0.62
   7   3   9    2.02    0.82
   7   3   9    1.77    0.91
   8   3   9    0.78    1.19
   8   3   9    2.17    0.79
   8   3   9    1.69    0.85
  -8   3  -9    1.04    1.06
  -8   3  -9    0.76    0.58
   9   3   9    1.57    0.83
  -9   3  -9    1.47    0.94
   9   3   9    2.16    0.93
  -9   3  -9    3.02    0.60
   9   3   9    2.84    0.72
 -10   3  -9    1.33    0.48
 -10   3  -9    0.41    0.75
  10   3   9    0.18    0.51
 -11   3  -9   -0.17    0.56
  11   3   9    0.95    0.39
 -11   3  -9    0.45    0.35
  12  -4  -9    0.05    0.73
  11  -4  -9    2.89    0.90
 -11   4   9    3.59    0.52
 -11   4   9    4.24    0.57
  10  -4  -9   11.99    1.34
 -10   4   9   11.90    1.01
   9   4  -9   21.19    1.83
  -9   4   9   23.19    1.64
   8   4  -9   22.47    1.93
  -8   4   9   25.10    1.74
  -7   4   9   18.95    1.39
   7   4  -9   17.54    1.63
  -6   4   9    5.66    0.66
   6   4  -9    4.84    0.92
   5   4  -9    0.71    0.75
  -5   4   9    0.73    0.47
  -4   4   9    0.24    0.45
   4   4  -9   -0.76    0.75
  -4   4   9    0.94    0.57
   3   4  -9    1.84    0.80
  -3   4   9    0.10    0.45
  -3   4   9    1.49    0.57
  -2   4   9   -0.09    0.55
  -2   4   9    1.09    0.47
   2   4  -9   -0.29    0.76
  -1   4   9    2.00    0.52
  -1   4   9    2.23    0.63
   0   4   9    0.22    0.57
   0   4   9    0.03    0.48
   1   4   9    0.97    0.57
   1   4   9    1.29    0.65
  -2   4  -9    3.89    0.94
   2   4   9    3.84    0.80
   2   4   9    4.25    0.74
   3   4   9    1.97    0.70
   3   4   9    1.68    0.73
  -3   4  -9   -0.23    0.86
   4   4   9    6.30    0.99
  -4   4  -9    6.50    1.15
   4   4   9    8.91    0.98
   5   4   9   20.41    1.73
   5   4   9   19.33    1.63
  -5   4  -9   20.37    1.89
   6   4   9    9.18    1.02
  -6   4  -9   12.71    1.36
   6   4   9    8.00    1.05
  -7   4  -9    2.71    0.97
   7   4   9    2.59    0.74
   7   4   9    4.19    0.62
   8   4   9    2.31    0.65
  -8   4  -9    1.70    0.85
   8   4   9    2.37    0.43
  -9   4  -9   -0.57    0.62
   9   4   9   -0.33    0.51
 -10   4  -9    0.05    0.48
  -9   5   9    2.48    0.38
  -9   5   9    1.86    0.40
  -8   5   9    2.15    0.42
  -7   5   9    1.00    0.37
  -6   5   9    2.44    0.44
  -5   5   9    9.61    0.93
   5   5  -9    8.30    1.21
  -5   5   9    9.06    0.78
   4   5  -9    1.93    0.95
  -4   5   9    1.46    0.42
  -4   5   9    2.01    0.54
  -3   5   9    2.84    0.47
  -3   5   9    2.50    0.56
  -2   5   9    1.35    0.50
  -2   5   9    0.70    0.41
  -1   5   9   -0.16    0.42
  -1   5   9   -0.31    0.46
   0   5   9    1.78    0.58
   0   5   9    2.90    0.52
   1   5   9   13.05    1.24
   1   5   9   14.49    1.11
   2   5   9   10.38    1.11
   2   5   9   13.05    0.97
   3   5   9    8.95    0.69
  -3   5  -9    7.87    0.97
   3   5   9    6.85    0.85
   4   5   9    1.02    0.53
  -4   5  -9    2.21    0.71
   5   5   9    0.98    0.49
  -5   5  -9    1.73    0.67
  -6   5  -9    2.20    0.62
   6   5   9    0.69    0.47
  -7   5  -9    1.41    0.53
   7   5   9    0.56    0.40
  -3   6   9    0.71    0.37
  -2   6   9    0.33    0.38
  -1   6   9    1.18    0.41
   0   6   9    2.44    0.44
   1   6   9    0.09    0.33
   2   6   9    0.15    0.32
  15   0 -10    4.08    0.89
  14   0 -10    1.06    0.89
  13   0 -10    8.00    1.21
  13   0 -10    8.40    0.96
  12   0 -10   20.18    1.73
  12   0 -10   18.75    1.57
  11   0 -10   27.42    1.94
  11   0 -10   20.18    2.31
  11   0 -10   28.60    2.04
  10   0 -10   15.76    1.38
  10   0 -10   13.58    1.40
  10   0 -10   14.50    1.27
   9   0 -10   57.75    3.96
   9   0 -10   61.07    3.92
   9   0 -10   55.62    3.86
   8   0 -10   51.24    3.34
   8   0 -10   51.45    3.39
   8   0 -10   49.36    3.32
   8   0 -10   47.14    3.42
   7   0 -10    7.60    1.01
   7   0 -10    7.79    0.88
   7   0 -10    7.36    0.79
   7   0 -10    7.78    0.86
   6   0 -10   24.05    1.73
   6   0 -10   25.09    1.78
   5   0 -10   37.53    2.57
   4   0 -10   41.55    2.82
   3   0 -10    7.67    0.81
   2   0 -10   33.38    2.33
   1   0 -10   18.94    1.46
   0   0 -10    8.98    0.94
  -1   0 -10   -0.14    0.51
  -2   0 -10    4.46    0.73
  -3   0 -10   10.67    1.14
  -4   0 -10    0.19    0.66
  -4   0 -10    1.11    0.68
  -5   0 -10    6.69    0.96
  -5   0 -10    5.82    1.01
  -5   0 -10    6.69    0.92
  -6   0 -10    6.76    1.04
  -6   0 -10    9.49    1.04
  -7   0 -10    0.00    0.74
  -8   0 -10   -0.26    0.78
  -9   0 -10    2.95    0.91
   9   0  10    5.44    1.61
  10   0  10   -1.13    1.35
 -10   0 -10    2.15    0.84
 -11   0 -10   -0.91    0.74
  11   0  10    1.37    1.35
  12   0  10    7.41    1.32
 -12   0 -10    3.78    0.78
  13   0  10    2.09    0.89
  15  -1 -10    5.63    0.79
  14  -1 -10    0.70    0.64
  14   1 -10   -0.17    0.81
  13  -1 -10    9.57    1.24
  13  -1 -10    9.18    1.28
  13  -1 -10    9.75    1.07
  13   1 -10    9.87    1.18
  12  -1 -10   21.84    1.83
  12  -1 -10   27.30    2.08
  12  -1 -10   24.63    1.99
  12   1 -10   21.57    1.92
  11  -1 -10    1.81    0.90
  11  -1 -10    1.69    0.90
  11  -1 -10    2.54    0.74
  11   1 -10    1.78    0.79
  10  -1 -10    3.85    0.79
  10  -1 -10    6.49    0.97
  10  -1 -10    4.63    1.03
  10   1 -10    4.05    0.83
   9  -1 -10   13.35    1.24
   9  -1 -10   10.79    1.06
   9  -1 -10   11.73    1.28
   9   1 -10   10.77    0.96
   9   1 -10    9.59    1.14
   9   1 -10   13.31    1.11
   8  -1 -10   11.10    1.04
   8  -1 -10   10.31    1.06
   8  -1 -10   12.32    1.33
   8  -1 -10   11.19    1.13
   8   1 -10   10.10    1.07
   8   1 -10   10.95    0.91
   8   1 -10   11.48    1.13
   7  -1 -10    0.07    0.61
   7  -1 -10    0.06    0.52
   7  -1 -10    0.95    0.78
   7  -1 -10    0.18    0.56
   7   1 -10    0.18    0.64
   7   1 -10    0.08    0.54
   7   1 -10   -0.55    0.40
   7   1 -10    0.28    0.47
   6  -1 -10   19.44    1.47
   6  -1 -10   17.86    1.44
   6   1 -10   18.70    1.52
   6   1 -10   17.64    1.30
   6   1 -10   19.08    1.37
   5  -1 -10   40.49    3.07
   5  -1 -10   42.88    2.87
   5   1 -10   41.73    2.79
   4  -1 -10   24.14    1.85
   4   1 -10   25.93    1.77
   3  -1 -10    9.29    0.98
   3   1 -10   10.05    0.90
   2  -1 -10    6.13    0.77
   2   1 -10    6.56    0.72
   1  -1 -10   16.32    1.42
   1   1 -10   18.90    1.36
   0  -1 -10   17.49    1.43
   0   1 -10   17.42    1.37
  -1  -1 -10   17.48    1.37
  -1   1 -10   14.43    1.29
  -2  -1 -10   40.50    2.80
  -2   1 -10   39.02    2.75
  -3  -1 -10   27.28    2.01
  -3   1 -10   24.61    1.95
  -3   1 -10   27.45    1.96
  -4  -1 -10   29.64    2.33
  -4   1 -10   29.71    2.28
  -4   1 -10   34.14    2.30
  -4   1 -10   32.49    2.39
  -5  -1 -10   20.39    1.95
  -5   1 -10   26.71    1.95
   5   1  10   31.05    2.69
  -5   1 -10   25.63    2.15
  -5   1 -10   26.70    1.99
  -6   1 -10   28.56    2.20
  -6   1 -10   24.15    2.64
   6   1  10   30.03    2.86
  -6   1 -10   29.79    2.36
  -7   1 -10    4.79    0.93
  -7   1 -10    5.25    1.16
   7   1  10    4.05    1.56
  -8   1 -10    2.78    1.16
  -8   1 -10    1.25    0.83
   8   1  10    1.69    1.50
  -9   1 -10    1.66    0.83
   9   1  10   -0.59    1.45
  10   1  10    2.40    0.84
  10   1  10    2.34    1.47
 -10   1 -10    1.86    0.85
 -11   1 -10    1.18    0.73
  11   1  10    3.33    1.37
  11   1  10    1.97    0.81
  12  -1  10    1.54    1.09
 -12   1 -10    1.53    0.61
  12   1  10    0.43    0.60
  12   1  10   -0.63    1.00
  14  -2 -10    2.97    0.73
  14  -2 -10    3.51    0.90
  14   2 -10    2.56    0.81
  13  -2 -10    3.84    1.00
  13  -2 -10    5.45    0.84
  13   2 -10    2.46    0.88
  12  -2 -10    6.56    0.92
  12  -2 -10    5.63    1.10
  12   2 -10    6.03    0.98
  11  -2 -10    8.12    1.24
  11  -2 -10    7.61    1.01
  11   2 -10    9.81    1.07
  10  -2 -10    8.18    0.95
  10  -2 -10    7.36    1.19
  10   2 -10    5.89    0.89
  10   2 -10    7.58    0.92
   9  -2 -10   25.73    2.04
   9  -2 -10   23.16    1.76
   9   2 -10   21.24    1.71
   9   2 -10   22.19    1.79
   8  -2 -10   26.40    1.95
   8  -2 -10   27.47    2.21
   8   2 -10   26.20    1.99
   8   2 -10   24.70    1.87
   7  -2 -10   13.98    1.30
   7  -2 -10   14.59    1.57
   7  -2 -10   14.46    1.31
   7   2 -10   17.17    1.38
   7   2 -10   13.06    1.16
   6  -2 -10   11.12    1.40
   6  -2 -10   11.73    1.18
   6  -2 -10   12.03    1.17
   6   2 -10   10.43    1.06
   6   2 -10   16.04    1.28
   5  -2 -10    9.43    1.20
   5  -2 -10    8.18    0.95
   5   2 -10    9.08    1.06
   4  -2 -10   18.08    1.49
   4   2 -10   19.50    1.58
   3  -2 -10   -0.17    0.52
   3   2 -10   -0.02    0.63
  -3   2  10   -0.30    0.52
   2  -2 -10   39.81    2.79
   2   2 -10   40.77    2.84
   1  -2 -10   19.59    1.65
  -1   2  10   19.70    1.60
   1   2 -10   23.40    1.52
   0  -2 -10   10.99    1.18
   0   2 -10   11.87    0.99
  -1  -2 -10    9.23    1.01
  -1   2 -10    7.53    0.84
  -1   2 -10    7.59    0.72
  -2   2 -10    0.88    0.51
  -2   2 -10    1.44    0.78
  -2   2 -10    2.06    0.60
  -3   2 -10    1.96    0.85
  -3   2 -10    1.91    0.66
   3   2  10    3.72    1.36
  -3   2 -10    4.55    0.68
  -4   2 -10    1.85    0.66
   4   2  10   -0.13    0.71
  -4   2 -10    0.06    0.68
  -4   2 -10    0.13    0.85
   4   2  10    1.75    1.36
  -5   2 -10    5.62    0.92
   5   2  10    6.18    1.60
   5   2  10    5.21    0.95
  -5   2 -10    4.93    1.09
   6   2  10   11.13    1.85
   6   2  10    8.63    1.20
  -6   2 -10   13.20    1.50
  -6   2 -10   10.03    1.18
  -7   2 -10    0.04    0.75
   7   2  10    1.19    1.45
   7   2  10   -0.15    0.78
  -7   2 -10   -0.36    1.01
   8   2  10    5.76    1.00
   8   2  10    8.37    1.69
  -8   2 -10    5.11    0.94
  -8   2 -10    6.24    1.19
   9   2  10    2.15    1.41
  -9   2 -10    3.12    1.00
  -9   2 -10    1.80    0.74
   9   2  10    2.37    0.86
  10   2  10    1.78    1.19
 -10   2 -10    1.38    0.66
  10   2  10    1.78    0.76
  11   2  10    0.51    0.61
  11   2  10   -0.02    0.90
 -11   2 -10    0.12    0.53
 -12   2 -10    0.43    0.40
  12   2  10    0.16    0.46
  13  -3 -10    1.06    0.60
  13  -3 -10    1.28    0.80
  13   3 -10    0.48    0.60
  12  -3 -10    5.59    1.04
  12  -3 -10    6.79    0.87
  12   3 -10    6.02    0.90
  11  -3 -10    3.71    1.01
  11  -3 -10    3.95    0.81
  11   3 -10    5.11    0.81
  11   3 -10    5.06    0.83
  10  -3 -10    6.56    1.12
  10   3 -10    5.46    0.89
   9  -3 -10    1.46    0.96
   9   3 -10    0.36    0.70
   8  -3 -10    4.64    1.09
   8   3 -10    3.63    0.79
   7  -3 -10    5.16    1.10
   7   3 -10    5.04    0.85
   6  -3 -10    8.87    1.27
   6   3 -10    8.84    1.07
   5  -3 -10   35.14    2.99
   5   3 -10   39.31    2.71
  -4   3  10   20.74    1.78
   4   3 -10   24.37    1.80
  -4   3  10   20.13    1.64
   3   3 -10   17.41    1.47
  -3   3  10   14.59    1.24
  -3   3  10   14.32    1.23
  -2   3  10    5.18    0.73
  -2   3  10    8.05    0.81
   2   3 -10    9.23    1.06
  -1   3  10    2.07    0.59
   1   3 -10    0.75    0.81
  -1   3  10    0.89    0.51
   0   3  10    7.19    0.88
   0   3 -10    9.66    1.02
   0   3  10    9.17    1.02
   0   3  10   12.02    1.52
   1   3  10    1.27    1.18
   1   3  10    2.03    0.68
  -1   3 -10    2.10    0.77
  -2   3 -10   20.15    1.71
   2   3  10   18.75    1.87
   2   3  10   19.49    2.12
   2   3  10   20.52    1.63
   3   3  10    2.88    1.32
   3   3  10    2.13    0.81
  -3   3 -10    2.66    0.91
   3   3  10    2.61    0.75
   4   3  10    5.48    1.54
  -4   3 -10    3.78    1.04
   4   3  10    4.37    0.93
   4   3  10    5.31    0.88
   5   3  10   11.24    1.23
   5   3  10    8.59    1.17
   5   3  10   11.95    1.80
  -5   3 -10   11.44    1.40
   6   3  10    4.24    0.85
   6   3  10    0.97    1.04
   6   3  10    2.05    1.43
  -6   3 -10    3.09    0.51
  -6   3 -10    3.46    1.10
  -7   3 -10    1.41    0.46
  -7   3 -10    1.19    1.00
   7   3  10   -0.19    0.71
   7   3  10   -0.61    1.19
  -8   3 -10    6.62    1.12
  -8   3 -10    7.06    0.67
   8   3  10    4.56    0.85
   8   3  10    6.04    1.24
  -9   3 -10    3.97    0.90
   9   3  10    3.96    0.88
   9   3  10    3.54    0.68
  -9   3 -10    3.73    0.50
 -10   3 -10    2.00    0.67
  10   3  10    1.96    0.48
  11  -4 -10   -0.44    0.70
 -11   4  10    0.35    0.41
 -11   4  10   -0.22    0.36
  10  -4 -10    0.46    0.78
 -10   4  10   -0.27    0.40
   9  -4 -10    1.76    0.81
  -9   4  10    1.61    0.46
   9   4 -10    0.74    0.70
   8  -4 -10    0.97    1.23
  -8   4  10    0.79    0.45
   8   4 -10    0.65    0.70
   7   4 -10    1.86    0.74
  -7   4  10    1.16    0.48
   6   4 -10    0.95    0.75
  -6   4  10    0.67    0.43
  -5   4  10    0.80    0.46
   5   4 -10    1.28    0.76
  -4   4  10    4.73    0.65
   4   4 -10    4.31    0.91
  -3   4  10    9.11    0.89
   3   4 -10    9.43    1.15
  -2   4  10   15.77    1.26
   2   4 -10   15.03    1.50
  -2   4  10   17.00    1.37
  -1   4  10   12.01    1.03
  -1   4  10   10.70    1.16
   0   4  10    9.04    0.92
   0   4  10    9.79    1.09
   1   4  10    6.82    0.90
  -1   4 -10    7.68    0.99
   1   4  10    6.94    0.83
   2   4  10    0.71    0.60
  -2   4 -10    1.58    0.82
   2   4  10    0.77    0.64
   3   4  10    0.74    0.65
   3   4  10    0.59    0.64
  -3   4 -10    0.25    0.83
  -4   4 -10    1.20    0.87
   4   4  10    1.28    0.66
   4   4  10   -0.10    0.63
   5   4  10    1.44    0.62
  -5   4 -10    1.78    0.89
   5   4  10    1.14    0.64
  -6   4 -10    0.63    0.82
   6   4  10    1.71    0.57
   6   4  10    0.78    0.61
   7   4  10    0.26    0.43
  -7   4 -10    0.19    0.74
   7   4  10    0.51    0.55
  -8   4 -10    0.99    0.67
   8   4  10    0.82    0.32
   8   4  10    0.92    0.50
  -9   4 -10    1.70    0.57
  -8   5  10    1.73    0.37
  -7   5  10    3.14    0.43
  -6   5  10    9.65    0.79
   5   5 -10   15.62    1.60
  -5   5  10   17.76    1.24
   4   5 -10    9.83    1.22
  -4   5  10    9.98    0.82
  -3   5  10    3.99    0.62
  -3   5  10    3.86    0.51
  -2   5  10    4.06    0.60
  -2   5  10    4.37    0.54
  -1   5  10    6.40    0.67
  -1   5  10    4.98    0.67
   0   5  10    3.91    0.53
   0   5  10    2.12    0.55
   1   5  10    3.06    0.59
   1   5  10    2.75    0.50
   2   5  10    0.61    0.39
   2   5  10    0.55    0.49
   3   5  10   -0.21    0.45
   3   5  10    0.53    0.31
  -3   5 -10   -0.01    0.55
  -4   5 -10   -0.50    0.54
   4   5  10    0.26    0.44
   5   5  10    0.10    0.40
  -5   5 -10    0.40    0.53
   6   5  10    0.14    0.37
  -6   5 -10    0.41    0.50
  15   0 -11    6.09    0.90
  13   0 -11    1.51    0.87
  12   0 -11    5.11    0.93
  12   0 -11    2.29    0.67
  11   0 -11    0.83    0.63
  11   0 -11    2.53    0.84
  10   0 -11    6.44    0.83
  10   0 -11    6.69    0.96
   9   0 -11    7.05    0.91
   9   0 -11    7.09    0.84
   9   0 -11    7.41    0.92
   8   0 -11    3.25    0.72
   8   0 -11    3.15    0.63
   8   0 -11    2.05    0.76
   7   0 -11   18.11    1.34
   7   0 -11   12.87    1.36
   7   0 -11   17.38    1.29
   7   0 -11   18.22    1.40
   6   0 -11    2.17    0.52
   6   0 -11    3.24    0.64
   6   0 -11    1.87    0.71
   6   0 -11    2.72    0.59
   5   0 -11    0.15    0.44
   5   0 -11    1.15    0.54
   4   0 -11    1.43    0.56
   4   0 -11    0.42    0.44
   3   0 -11   22.63    1.67
   3   0 -11   23.17    1.71
   2   0 -11   41.76    2.87
   1   0 -11   15.54    1.30
   0   0 -11    1.81    0.58
  -1   0 -11   -0.01    0.59
  -1   0 -11    0.61    0.57
  -2   0 -11   10.81    1.12
  -2   0 -11   11.18    1.15
  -3   0 -11    1.42    0.67
  -3   0 -11    1.21    0.70
  -3   0 -11    0.97    0.75
  -4   0 -11    0.37    0.71
  -4   0 -11    0.06    0.65
  -4   0 -11   -1.09    0.75
  -5   0 -11   10.24    1.14
  -5   0 -11    9.43    1.21
  -5   0 -11    9.36    1.10
  -6   0 -11   18.66    1.59
  -7   0 -11    8.93    1.09
  -8   0 -11    4.68    0.93
  -9   0 -11    4.49    0.89
   9   0  11    4.76    1.56
  10   0  11    3.00    1.36
 -10   0 -11    0.44    0.73
  11   0  11    3.38    1.25
 -11   0 -11    1.73    0.67
  12   0  11   -0.96    0.88
  14  -1 -11    1.26    0.60
  14   1 -11    0.65    0.76
  13  -1 -11    3.85    0.76
  13  -1 -11    6.57    1.00
  13   1 -11    5.34    0.95
  12  -1 -11    6.52    0.91
  12  -1 -11    8.41    1.11
  12  -1 -11    7.28    1.03
  12   1 -11    6.81    1.00
  11  -1 -11    7.58    0.95
  11  -1 -11    8.88    1.17
  11  -1 -11    8.31    1.11
  11   1 -11    7.84    1.02
  10  -1 -11    8.84    0.98
  10  -1 -11    9.11    1.11
  10  -1 -11    8.75    1.15
  10   1 -11    8.04    1.01
   9  -1 -11   34.22    2.45
   9  -1 -11   33.22    2.29
   9  -1 -11   32.29    2.37
   9   1 -11   31.63    2.31
   9   1 -11   29.68    2.32
   8  -1 -11    1.84    0.76
   8  -1 -11    1.33    0.88
   8  -1 -11    1.86    0.63
   8   1 -11    0.41    0.40
   8   1 -11    0.72    0.62
   8   1 -11    0.68    0.66
   7  -1 -11    1.44    0.60
   7  -1 -11    1.72    0.65
   7  -1 -11    2.24    0.71
   7  -1 -11    1.63    0.83
   7   1 -11    2.54    0.65
   7   1 -11    1.45    0.43
   7   1 -11    1.64    0.52
   7   1 -11    2.04    0.74
   6  -1 -11    8.95    0.98
   6  -1 -11    9.80    1.01
   6  -1 -11   10.36    1.22
   6  -1 -11    9.28    1.06
   6   1 -11   10.25    1.10
   6   1 -11   10.38    0.90
   6   1 -11    8.53    0.78
   6   1 -11    9.59    1.02
   5  -1 -11   47.13    3.14
   5  -1 -11   41.02    3.14
   5  -1 -11   50.02    3.16
   5  -1 -11   47.23    3.28
   5   1 -11   42.86    3.02
   5   1 -11   47.91    3.07
   5   1 -11   47.57    3.16
   4  -1 -11   61.00    4.04
   4  -1 -11   59.92    4.02
   4   1 -11   62.01    3.97
   4   1 -11   58.66    3.93
   3  -1 -11   21.19    1.64
   3  -1 -11   20.39    1.62
   3   1 -11   20.85    1.50
   3   1 -11   22.69    1.58
   2  -1 -11   54.32    3.82
   2  -1 -11   53.42    3.88
   2   1 -11   56.95    3.72
   2   1 -11   61.25    3.78
   1  -1 -11   80.23    5.50
   1   1 -11   84.91    5.46
   1   1 -11   85.03    5.43
   0  -1 -11   11.39    1.23
   0  -1 -11   12.09    1.38
   0   1 -11   14.76    1.18
   0   1 -11   13.38    1.10
  -1  -1 -11    0.32    0.60
  -1  -1 -11    1.60    0.71
  -1   1 -11    0.82    0.54
  -1   1 -11    1.93    0.57
  -2  -1 -11    4.12    0.83
  -2  -1 -11    2.54    0.73
  -2   1 -11    3.89    0.81
  -2   1 -11    2.00    0.63
  -2   1 -11    3.72    0.66
  -3  -1 -11    0.05    0.76
  -3  -1 -11    1.20    0.67
  -3   1 -11   -0.40    0.60
  -3   1 -11    1.25    0.76
  -3   1 -11   -0.19    0.59
  -4  -1 -11    0.21    0.66
  -4   1 -11    0.77    0.65
  -4   1 -11   -0.23    0.85
  -4   1 -11    0.46    0.67
  -5  -1 -11    1.37    0.89
   5   1  11    2.42    1.58
  -5   1 -11    1.86    0.89
  -5   1 -11    1.57    0.75
   6   1  11    3.39    1.46
  -6   1 -11    3.82    0.85
  -6   1 -11    4.61    1.03
   7   1  11    2.72    1.48
  -7   1 -11    2.51    1.03
  -7   1 -11    3.55    0.84
  -8   1 -11    1.89    1.41
   8   1  11    0.79    1.39
  -8   1 -11    1.09    0.78
  -9   1 -11    6.61    0.99
   9   1  11    8.45    1.67
  10   1  11    2.62    1.20
 -10   1 -11    1.72    0.73
  10   1  11   -0.63    1.23
 -11   1 -11    1.85    0.65
  11   1  11    1.46    0.68
  11   1  11    2.95    1.17
 -12   1 -11    2.35    0.56
  12   1  11    4.07    0.92
  14  -2 -11    2.01    0.61
  14   2 -11    3.25    0.72
  13  -2 -11    2.02    0.82
  13  -2 -11   -0.14    0.63
  13   2 -11    0.60    0.75
  12  -2 -11    3.86    0.96
  12  -2 -11    4.18    0.81
  12   2 -11    5.16    0.87
  11  -2 -11    6.12    0.88
  11  -2 -11    5.02    1.03
  11   2 -11    6.57    0.88
  10  -2 -11    0.89    0.71
  10  -2 -11    0.90    0.95
  10   2 -11    0.39    0.65
  10   2 -11    0.78    0.64
   9  -2 -11    5.91    0.85
   9  -2 -11    6.13    1.11
   9   2 -11    4.68    0.74
   9   2 -11    3.28    0.76
   8  -2 -11    8.83    1.04
   8  -2 -11   11.36    1.37
   8   2 -11    9.26    1.13
   8   2 -11    9.51    0.95
   7  -2 -11    8.53    1.01
   7  -2 -11   11.25    1.39
   7   2 -11   14.03    1.23
   7   2 -11    9.69    0.97
   6  -2 -11    6.68    0.95
   6  -2 -11    7.02    1.15
   6  -2 -11    5.67    0.83
   6   2 -11    7.76    0.98
   6   2 -11    6.09    0.79
   5  -2 -11    2.20    0.67
   5  -2 -11    2.34    0.91
   5  -2 -11    1.43    0.63
   5   2 -11    2.03    0.74
   5   2 -11    2.82    0.61
   4  -2 -11    6.27    0.83
   4  -2 -11    6.73    1.08
   4  -2 -11    7.15    0.86
   4   2 -11    7.49    0.84
   4   2 -11    7.42    0.96
   3  -2 -11    0.82    0.56
   3  -2 -11    0.85    0.78
   3   2 -11    1.21    0.69
   3   2 -11    0.95    0.55
   2  -2 -11   11.89    1.18
   2  -2 -11   12.24    1.42
   2   2 -11   11.57    1.16
   2   2 -11   14.27    1.25
   1  -2 -11   10.22    1.42
   1  -2 -11   12.57    1.17
  -1   2  11   16.23    2.18
   1   2 -11   11.08    1.16
   0  -2 -11    2.14    0.71
   0   2 -11    1.58    0.71
   0   2 -11    3.03    0.55
   0   2  11    2.97    1.16
  -1   2 -11    0.70    0.71
  -1   2 -11    2.37    0.43
  -1   2 -11    0.66    0.52
   1   2  11    2.18    1.21
  -2   2 -11    7.15    1.02
  -2   2 -11    8.51    0.79
  -2   2 -11    6.59    0.85
   2   2  11   10.45    1.59
  -3   2 -11   12.68    1.20
   3   2  11   12.27    1.81
  -3   2 -11   12.68    1.12
  -3   2 -11   11.69    1.37
  -4   2 -11    1.50    0.86
   4   2  11    1.02    1.34
  -4   2 -11    1.77    0.70
  -5   2 -11    6.31    1.08
   5   2  11    6.02    1.56
   5   2  11    4.98    0.97
  -5   2 -11    7.19    0.90
   6   2  11    9.43    1.19
  -6   2 -11   12.79    1.39
  -6   2 -11    9.81    1.10
   6   2  11   12.93    1.85
   7   2  11    4.45    1.47
  -7   2 -11    3.79    1.03
   7   2  11    4.33    0.89
  -7   2 -11    3.24    0.78
  -8   2 -11    5.37    1.10
   8   2  11    7.40    1.58
   8   2  11    5.04    0.92
  -8   2 -11    5.81    0.82
   9   2  11    2.80    0.81
  -9   2 -11    4.77    0.94
   9   2  11    4.27    1.34
  -9   2 -11    4.03    0.70
  10   2  11    1.08    1.01
  10   2  11    2.35    0.66
 -10   2 -11    1.07    0.54
  11   2  11    1.06    0.51
 -11   2 -11    0.61    0.42
  11   2  11    0.41    0.73
  13  -3 -11    6.77    0.93
  12  -3 -11   11.70    1.03
  12  -3 -11   10.45    1.23
  11  -3 -11    4.39    0.96
  11  -3 -11    5.71    0.78
  11   3 -11    3.92    0.77
  10  -3 -11    0.79    0.66
  10  -3 -11    1.58    0.91
  10   3 -11    1.32    0.69
   9  -3 -11    4.54    1.03
   9   3 -11    4.09    0.81
   8  -3 -11    0.85    0.94
   8   3 -11    1.32    0.70
   7  -3 -11    0.99    0.91
   7   3 -11    1.64    0.71
   6  -3 -11   10.53    1.32
   6   3 -11    9.04    1.07
   5  -3 -11    3.68    1.01
   5   3 -11    4.18    0.81
   4  -3 -11   27.38    2.38
   4   3 -11   32.23    2.29
   3   3 -11   10.68    1.25
  -2   3  11    4.75    0.69
   2   3 -11    6.25    0.97
  -1   3  11    4.91    0.74
   1   3 -11    5.43    0.97
   1   3 -11    5.39    1.06
   0   3  11    5.93    0.80
   0   3  11    7.48    1.36
   0   3 -11    5.74    0.83
   1   3  11    8.84    1.41
   1   3  11    5.17    0.84
  -1   3 -11    6.41    0.92
   2   3  11   12.79    1.26
   2   3  11   13.42    1.83
  -2   3 -11   13.63    1.35
   3   3  11   10.15    1.15
   3   3  11   11.11    1.68
  -3   3 -11   10.59    1.27
   4   3  11    2.23    0.73
  -4   3 -11    2.67    0.93
   4   3  11    4.47    1.39
   5   3  11    3.50    0.79
  -5   3 -11    2.42    0.96
   5   3  11    3.14    1.31
  -6   3 -11    3.64    1.02
   6   3  11    5.00    1.31
   6   3  11    3.37    0.78
  -7   3 -11    2.38    0.94
   7   3  11    3.69    0.75
   7   3  11    3.71    1.12
   8   3  11   -0.36    0.90
   8   3  11    0.60    0.56
  -8   3 -11    2.53    0.85
   9   3  11   -0.06    0.47
   9   3  11    0.33    0.62
  -9   3 -11    1.39    0.68
  10   3  11    0.21    0.36
 -10   3 -11    0.32    0.50
  11  -4 -11    0.05    0.63
  10  -4 -11    1.02    0.70
 -10   4  11    0.97    0.37
   9  -4 -11    7.88    1.04
   9   4 -11    7.09    0.94
  -9   4  11    7.71    0.71
   8  -4 -11   17.46    1.59
   8   4 -11   18.57    1.53
  -8   4  11   17.32    1.30
   7  -4 -11    6.83    1.09
  -7   4  11    5.84    0.66
   7   4 -11    6.82    0.91
  -6   4  11    4.96    0.58
   6   4 -11    4.66    0.84
   5   4 -11    0.05    0.70
  -5   4  11    1.23    0.46
   4   4 -11    0.59    0.75
  -4   4  11    0.32    0.42
   3   4 -11    0.81    0.76
  -3   4  11   -0.20    0.40
   2   4 -11    2.06    0.84
  -2   4  11    3.28    0.54
  -1   4  11   10.18    0.95
   0   4  11    0.55    0.47
  -1   4 -11    4.54    0.81
   1   4  11    4.04    0.64
   1   4  11    3.10    0.74
  -2   4 -11   10.17    1.18
   2   4  11   11.13    1.12
   2   4  11   10.35    1.04
  -3   4 -11    8.04    0.99
   3   4  11    7.07    0.83
   3   4  11    5.33    0.81
   4   4  11    4.68    0.74
  -4   4 -11    6.41    0.93
   4   4  11    6.01    0.78
   5   4  11    0.92    0.55
   5   4  11    1.60    0.54
  -5   4 -11    0.55    0.75
  -6   4 -11    1.88    0.75
   6   4  11    1.39    0.48
  -7   4 -11    0.84    0.64
   7   4  11    1.03    0.37
  -8   4 -11    0.87    0.55
  -7   5  11    2.01    0.35
  -6   5  11    0.66    0.32
  -5   5  11    0.16    0.30
  -4   5  11    0.64    0.33
  -3   5  11    0.83    0.37
  -2   5  11   -0.21    0.34
  -1   5  11    1.61    0.41
  -1   5  11    0.93    0.44
   0   5  11    0.84    0.43
   0   5  11    1.48    0.43
   1   5  11    8.73    0.88
   1   5  11   10.95    0.83
   2   5  11    8.51    0.85
   2   5  11   10.14    0.76
   3   5  11    4.76    0.62
  -3   5 -11    6.29    0.73
   3   5  11    6.14    0.50
  -4   5 -11    2.14    0.48
   4   5  11    1.78    0.44
  -5   5 -11    0.86    0.45
  14   0 -12   15.17    1.34
  13   0 -12    1.31    0.81
  12   0 -12   -0.06    0.50
  12   0 -12   -0.24    0.78
  11   0 -12    0.31    0.78
  11   0 -12    0.21    0.57
  10   0 -12    4.11    0.85
  10   0 -12    3.69    0.66
   9   0 -12    2.17    0.61
   9   0 -12    2.46    0.75
   8   0 -12   17.46    1.51
   8   0 -12   19.00    1.39
   8   0 -12   16.97    1.67
   7   0 -12    3.87    0.78
   7   0 -12    4.40    0.66
   7   0 -12    4.25    0.73
   6   0 -12    2.65    0.55
   6   0 -12    2.08    0.71
   6   0 -12    2.20    0.60
   6   0 -12    2.33    0.66
   5   0 -12    3.28    0.68
   5   0 -12    3.98    0.75
   5   0 -12    4.87    0.79
   5   0 -12    4.08    0.61
   4   0 -12    6.02    0.76
   4   0 -12    6.48    0.69
   4   0 -12    5.35    0.80
   4   0 -12    4.33    0.79
   3   0 -12    0.02    0.53
   3   0 -12    1.10    0.62
   3   0 -12    0.33    0.62
   3   0 -12    0.01    0.46
   2   0 -12   19.58    1.67
   2   0 -12   19.33    1.65
   2   0 -12   21.79    1.53
   2   0 -12   18.68    1.57
   1   0 -12   80.83    5.48
   1   0 -12   86.11    5.40
   1   0 -12   80.34    5.48
   1   0 -12   80.99    5.42
   0   0 -12   55.84    3.69
   0   0 -12   53.22    3.57
   0   0 -12   49.88    3.59
  -1   0 -12   19.85    1.54
  -1   0 -12   19.60    1.64
  -1   0 -12   17.86    1.55
  -2   0 -12   43.55    3.12
  -2   0 -12   42.04    3.06
  -2   0 -12   45.79    3.05
  -3   0 -12   33.63    2.42
  -3   0 -12   30.30    2.43
  -3   0 -12   35.56    2.49
  -4   0 -12    4.48    0.82
  -4   0 -12    3.54    0.88
  -5   0 -12    1.94    0.76
  -5   0 -12    4.23    0.91
  -6   0 -12    0.61    0.69
  -7   0 -12    1.54    0.74
  -8   0 -12    0.33    0.71
  -9   0 -12    1.17    0.71
   9   0  12    0.62    1.28
 -10   0 -12    1.89    0.69
  10   0  12    2.68    1.23
 -11   0 -12    0.32    0.57
  11   0  12    0.27    0.95
  14   1 -12    0.20    0.70
  13  -1 -12    7.10    0.94
  13  -1 -12    5.04    0.73
  13   1 -12    5.06    0.91
  12  -1 -12   16.34    1.51
  12  -1 -12   17.28    1.39
  12   1 -12   18.01    1.51
  11  -1 -12   21.11    1.68
  11  -1 -12   18.40    1.53
  11  -1 -12   19.92    1.67
  11   1 -12   19.71    1.62
  10  -1 -12   27.52    2.19
  10  -1 -12   29.49    2.13
  10  -1 -12   29.98    2.23
  10   1 -12   29.62    2.16
   9  -1 -12   26.17    2.12
   9  -1 -12   28.07    2.02
   9  -1 -12   29.34    2.10
   9   1 -12   24.73    2.06
   9   1 -12   29.58    2.06
   8  -1 -12   21.40    1.90
   8  -1 -12   26.04    1.86
   8  -1 -12   25.09    2.00
   8   1 -12   25.41    1.89
   8   1 -12   25.66    1.93
   7  -1 -12    5.03    0.80
   7  -1 -12    3.96    0.72
   7  -1 -12    5.51    0.99
   7   1 -12    4.35    0.87
   7   1 -12    6.28    0.82
   6  -1 -12    3.01    0.68
   6  -1 -12    3.93    0.92
   6  -1 -12    2.72    0.86
   6  -1 -12    2.21    0.69
   6   1 -12    2.45    0.69
   6   1 -12    2.83    0.57
   6   1 -12    1.55    0.41
   6   1 -12    2.52    0.77
   5  -1 -12    0.52    0.75
   5  -1 -12    0.99    0.59
   5  -1 -12    1.10    0.63
   5  -1 -12    1.07    0.61
   5   1 -12    0.72    0.38
   5   1 -12    0.63    0.50
   5   1 -12    1.39    0.65
   4  -1 -12   14.93    1.31
   4  -1 -12   16.41    1.50
   4  -1 -12   14.65    1.33
   4  -1 -12   16.07    1.28
   4   1 -12   14.17    1.11
   4   1 -12   15.17    1.33
   4   1 -12   15.38    1.21
   3  -1 -12    2.65    0.65
   3  -1 -12    2.25    0.76
   3  -1 -12    1.81    0.65
   3  -1 -12    1.53    0.60
   3   1 -12    2.04    0.43
   3   1 -12    1.36    0.53
   3   1 -12    1.35    0.67
   2  -1 -12    8.69    1.01
   2  -1 -12    8.92    1.01
   2  -1 -12    8.51    1.18
   2  -1 -12    8.78    1.00
   2   1 -12    9.39    1.02
   2   1 -12    8.79    0.82
   2   1 -12   10.24    0.96
   1  -1 -12    3.71    0.77
   1  -1 -12    3.79    0.95
   1  -1 -12    4.54    0.79
   1  -1 -12    5.01    0.86
   1   1 -12    5.63    0.71
   1   1 -12    5.52    0.87
   1   1 -12    5.60    0.65
   0  -1 -12    0.00    0.62
   0  -1 -12    0.05    0.61
   0  -1 -12    0.45    0.69
   0   1 -12    0.10    0.53
   0   1 -12    0.02    0.54
   0   1 -12    0.35    0.73
   0   1 -12    1.88    0.53
  -1  -1 -12    2.84    0.71
  -1  -1 -12    2.71    0.75
  -1   1 -12    1.67    0.60
  -1   1 -12    2.53    0.79
  -1   1 -12    2.53    0.62
  -2  -1 -12   10.06    1.15
  -2  -1 -12    8.92    1.08
  -2   1 -12    9.44    0.99
  -2   1 -12   10.17    1.07
  -2   1 -12   10.19    1.14
  -3  -1 -12    2.08    0.76
  -3  -1 -12    1.49    0.74
  -3   1 -12    3.38    0.73
  -3   1 -12    2.53    0.90
  -3   1 -12    2.16    0.81
  -4  -1 -12    3.97    0.86
  -4   1 -12    3.87    0.90
  -4   1 -12    3.80    0.80
  -5  -1 -12   11.48    1.36
  -5   1 -12   16.85    1.38
  -5   1 -12   16.85    1.54
  -6   1 -12   14.92    1.57
  -6   1 -12   15.72    1.43
   6   1  12   17.14    2.21
   7   1  12    3.71    1.48
  -7   1 -12    2.33    0.93
  -7   1 -12    1.85    0.76
  -8   1 -12    0.63    0.70
   8   1  12    0.14    1.29
   9   1  12    2.67    1.29
  -9   1 -12    0.97    0.66
  10   1  12    2.65    1.15
 -10   1 -12    3.11    0.66
 -11   1 -12    0.44    0.49
  11   1  12    0.38    0.85
  13  -2 -12    0.98    0.62
  13  -2 -12    1.01    0.56
  13   2 -12    1.54    0.68
  12  -2 -12    1.81    0.80
  12  -2 -12    2.16    0.67
  12   2 -12    1.46    0.71
  11  -2 -12    0.45    0.66
  11  -2 -12    1.62    0.83
  11   2 -12    1.97    0.69
  10  -2 -12    1.43    0.89
  10  -2 -12    1.94    0.70
  10   2 -12    2.28    0.67
  10   2 -12    0.37    0.60
   9  -2 -12    4.05    0.98
   9  -2 -12    2.57    0.72
   9   2 -12    2.36    0.68
   9   2 -12    2.69    0.65
   8  -2 -12    4.33    0.76
   8  -2 -12    3.98    1.05
   8   2 -12    3.83    0.67
   8   2 -12    2.87    0.77
   7  -2 -12    0.28    0.93
   7  -2 -12    1.29    0.62
   7   2 -12    0.45    0.54
   7   2 -12    2.05    0.78
   6  -2 -12    8.77    0.93
   6  -2 -12    6.51    1.18
   6   2 -12    6.74    0.83
   6   2 -12    7.48    1.02
   5  -2 -12   17.63    1.75
   5  -2 -12   16.04    1.48
   5   2 -12   20.47    1.62
   5   2 -12   18.59    1.46
   4  -2 -12    9.03    1.03
   4  -2 -12   10.96    1.33
   4   2 -12    8.66    1.01
   4   2 -12   10.99    1.17
   3  -2 -12    2.65    0.67
   3  -2 -12    2.23    0.85
   3  -2 -12    2.87    0.69
   3   2 -12    3.19    0.76
   3   2 -12    3.65    0.68
   2  -2 -12    7.80    0.93
   2  -2 -12    9.05    1.20
   2   2 -12    8.17    0.97
   2   2 -12    8.14    0.97
   1  -2 -12   16.25    1.44
   1  -2 -12   18.23    1.73
   1   2 -12   16.06    1.45
   1   2 -12   16.32    1.42
   0  -2 -12   17.06    1.61
   0   2 -12   19.19    1.59
   0   2  12   20.51    2.01
  -1   2 -12    8.34    1.03
  -1   2 -12    7.90    0.68
   1   2  12    9.75    1.54
  -2   2 -12   12.25    0.99
  -2   2 -12   12.78    1.34
   2   2  12   13.43    1.79
  -3   2 -12   11.87    1.41
  -3   2 -12   12.25    1.06
   3   2  12   13.88    1.82
  -4   2 -12    2.93    0.91
   4   2  12    2.19    1.35
  -4   2 -12    3.18    0.67
   5   2  12    0.93    1.35
  -5   2 -12    1.61    0.67
  -5   2 -12    0.68    0.88
   6   2  12    2.33    0.75
   6   2  12    1.08    1.33
  -6   2 -12    1.95    0.67
  -6   2 -12    2.50    0.94
   7   2  12    2.26    1.37
   7   2  12    2.47    0.75
  -7   2 -12    2.95    0.94
  -7   2 -12    3.61    0.66
   8   2  12    4.65    1.36
   8   2  12    4.56    0.80
  -8   2 -12    5.37    0.70
  -8   2 -12    4.69    0.95
  -9   2 -12    0.08    0.72
   9   2  12    2.56    1.11
   9   2  12    0.48    0.59
  -9   2 -12    1.81    0.51
  10   2  12    1.88    0.57
 -10   2 -12    2.82    0.43
  10   2  12    3.69    0.89
  12  -3 -12    4.08    0.65
  12  -3 -12    3.31    0.79
  11  -3 -12    2.46    0.81
  11  -3 -12    3.68    0.66
  10  -3 -12    3.83    0.94
  10  -3 -12    4.47    0.73
  10   3 -12    2.55    0.72
   9  -3 -12    3.52    0.94
   9  -3 -12    3.65    0.72
   9   3 -12    3.60    0.76
   8  -3 -12    5.94    1.08
   8   3 -12    4.73    0.82
   7  -3 -12    2.22    0.94
   7   3 -12    2.24    0.72
   6  -3 -12   11.84    1.42
   6   3 -12   11.96    1.22
   5  -3 -12    4.90    1.05
   5   3 -12    5.14    0.84
   4  -3 -12   17.60    1.67
   4   3 -12   15.21    1.46
   3  -3 -12    8.73    1.22
   3   3 -12   11.19    1.22
   2  -3 -12    7.33    1.16
   2   3 -12    9.43    1.09
   1  -3 -12    5.60    1.37
  -1   3  12    7.00    0.81
   1   3 -12    6.31    0.83
   1   3 -12    7.29    1.01
   0   3 -12    2.20    0.68
   0   3  12    2.46    0.63
  -1   3 -12    0.29    1.16
   1   3  12    0.05    0.56
   1   3  12    0.57    1.16
   2   3  12    2.09    0.68
  -2   3 -12    2.26    0.79
   2   3  12    1.91    1.28
   3   3  12    2.31    1.27
  -3   3 -12    2.14    0.81
   3   3  12    1.58    0.68
  -4   3 -12    2.79    0.86
   4   3  12    2.78    0.69
   4   3  12    2.07    1.27
  -5   3 -12    8.10    1.08
   5   3  12    8.61    1.43
   5   3  12    6.74    0.90
   6   3  12    3.03    0.69
  -6   3 -12    3.93    0.92
   6   3  12    3.82    1.18
   7   3  12    3.04    1.03
   7   3  12    2.49    0.60
  -7   3 -12    3.15    0.85
  -8   3 -12    0.14    0.66
   8   3  12   -0.01    0.70
   8   3  12    0.29    0.47
   9   3  12    1.80    0.45
  -9   3 -12    1.66    0.58
  10  -4 -12    1.77    0.65
   9  -4 -12    4.21    0.78
  -9   4  12    3.31    0.46
   8  -4 -12    3.50    0.81
   8   4 -12    3.76    0.74
  -8   4  12    3.97    0.49
   7  -4 -12    2.49    0.85
   7   4 -12    3.37    0.72
  -7   4  12    3.26    0.48
   6  -4 -12    3.28    0.90
   6   4 -12    4.23    0.76
  -6   4  12    3.71    0.50
   5   4 -12    2.11    0.71
  -5   4  12    3.32    0.51
   4   4 -12    9.03    1.06
  -4   4  12    9.28    0.83
   3   4 -12    1.67    0.76
  -3   4  12    2.40    0.49
  -2   4  12    1.41    0.44
  -1   4  12    3.75    0.57
   0   4  12    2.33    0.51
   1   4  12    1.31    0.47
  -1   4 -12    1.14    0.64
   2   4  12   -0.67    0.46
  -2   4 -12    1.38    0.69
   3   4  12   -0.53    0.46
  -3   4 -12   -0.60    0.66
   4   4  12    1.39    0.50
  -4   4 -12    1.49    0.69
  -5   4 -12    2.73    0.72
   5   4  12    3.70    0.52
   6   4  12    1.74    0.39
  -6   4 -12    2.06    0.62
   7   4  12    3.01    0.38
  -7   4 -12    3.78    0.60
  -6   5  12    4.88    0.47
  -5   5  12   12.31    0.90
  -4   5  12   10.31    0.80
  -3   5  12    2.77    0.41
  -2   5  12    0.44    0.31
  -1   5  12    3.14    0.43
   0   5  12    5.51    0.55
   1   5  12    0.79    0.33
   2   5  12    0.90    0.28
  14   0 -13    0.97    0.66
  13   0 -13   -0.63    0.71
  12   0 -13   -1.22    0.72
  11   0 -13    4.93    0.89
  10   0 -13    3.85    0.83
  10   0 -13    3.31    0.58
   9   0 -13   10.47    0.95
   9   0 -13   11.11    1.11
   8   0 -13   36.37    2.55
   8   0 -13   34.27    2.54
   8   0 -13   35.50    2.42
   7   0 -13   43.39    2.97
   7   0 -13   48.74    3.11
   7   0 -13   41.38    3.10
   6   0 -13   49.35    3.75
   6   0 -13   59.23    3.83
   6   0 -13   60.93    3.72
   5   0 -13    8.68    1.02
   5   0 -13    8.80    0.88
   5   0 -13   11.43    1.13
   4   0 -13   50.26    3.28
   4   0 -13   48.54    3.38
   4   0 -13   47.28    3.34
   4   0 -13   49.19    3.33
   3   0 -13   15.24    1.41
   3   0 -13   13.55    1.34
   3   0 -13   16.10    1.24
   3   0 -13   16.20    1.32
   2   0 -13    5.28    0.85
   2   0 -13    5.38    0.73
   2   0 -13    5.23    0.89
   2   0 -13    6.35    0.80
   1   0 -13    1.62    0.74
   1   0 -13    1.91    0.81
   1   0 -13    1.71    0.62
   1   0 -13    0.64    0.56
   0   0 -13    3.80    0.85
   0   0 -13    4.24    0.75
   0   0 -13    3.07    0.65
   0   0 -13    2.45    0.87
  -1   0 -13    0.69    0.67
  -1   0 -13    2.76    0.68
  -1   0 -13    2.73    0.81
  -2   0 -13   -0.19    0.72
  -2   0 -13   -0.32    0.63
  -3   0 -13    3.35    0.75
  -3   0 -13    1.41    0.77
  -4   0 -13    0.83    0.70
  -4   0 -13    0.85    0.72
  -5   0 -13    2.77    0.78
  -6   0 -13    0.06    0.71
  -7   0 -13    4.85    0.84
  -8   0 -13    8.06    0.97
  -9   0 -13    4.87    0.79
   9   0  13    9.50    1.47
 -10   0 -13    3.14    0.66
  10   0  13    7.38    1.21
  13  -1 -13    1.09    0.68
  13  -1 -13    0.82    0.47
  13   1 -13    1.47    0.66
  12  -1 -13    5.43    0.72
  12  -1 -13    6.45    0.93
  12   1 -13    4.77    0.85
  11  -1 -13    5.84    0.77
  11  -1 -13    6.83    0.94
  11   1 -13    6.46    0.89
  10  -1 -13    0.34    0.70
  10  -1 -13    1.67    0.78
  10  -1 -13    1.46    0.59
  10   1 -13    0.26    0.69
   9  -1 -13    3.43    0.69
   9  -1 -13    3.06    0.78
   9   1 -13    2.61    0.74
   9   1 -13    3.10    0.75
   8  -1 -13    2.05    0.78
   8  -1 -13    1.09    0.61
   8  -1 -13    1.05    0.69
   8   1 -13    0.42    0.66
   8   1 -13   -0.08    0.68
   7  -1 -13    4.28    0.79
   7  -1 -13    3.92    0.91
   7  -1 -13    4.75    0.73
   7   1 -13    5.74    0.82
   7   1 -13    5.10    0.86
   6  -1 -13    6.93    0.84
   6  -1 -13    6.72    0.91
   6  -1 -13    7.30    1.07
   6   1 -13    6.57    0.90
   6   1 -13    7.12    0.98
   5  -1 -13    9.44    1.20
   5  -1 -13    8.10    0.91
   5  -1 -13    8.55    0.96
   5   1 -13    9.11    0.99
   5   1 -13    7.52    0.68
   4  -1 -13    0.17    0.74
   4  -1 -13    0.81    0.64
   4  -1 -13    1.39    0.59
   4   1 -13    0.94    0.36
   4   1 -13    2.33    0.70
   3  -1 -13   19.39    1.63
   3  -1 -13   18.39    1.56
   3  -1 -13   18.70    1.66
   3  -1 -13   20.84    1.76
   3   1 -13   21.54    1.66
   3   1 -13   20.07    1.40
   3   1 -13   18.72    1.51
   2  -1 -13   21.12    1.61
   2  -1 -13   20.21    1.80
   2  -1 -13   19.26    1.69
   2  -1 -13   18.72    1.63
   2   1 -13   21.04    1.73
   2   1 -13   18.60    1.44
   2   1 -13   21.52    1.54
   1  -1 -13   13.55    1.43
   1  -1 -13   14.27    1.51
   1  -1 -13   16.77    1.43
   1  -1 -13   14.28    1.31
   1   1 -13   14.26    1.46
   1   1 -13   15.22    1.28
   1   1 -13   15.52    1.18
   0  -1 -13   10.95    1.27
   0  -1 -13   10.92    1.18
   0  -1 -13   12.30    1.31
   0   1 -13   12.14    1.31
   0   1 -13   14.30    1.08
   0   1 -13   11.07    1.29
  -1  -1 -13    3.07    0.78
  -1   1 -13    3.27    0.68
  -1   1 -13    4.13    0.69
  -1   1 -13    3.35    0.86
  -2  -1 -13   22.41    1.94
  -2   1 -13   28.14    1.89
  -2   1 -13   24.87    2.02
  -3  -1 -13    9.65    1.14
  -3   1 -13   10.85    1.10
  -3   1 -13   11.21    1.27
  -4  -1 -13    0.14    0.67
  -4   1 -13   -0.23    0.67
  -4   1 -13    0.78    0.79
  -5  -1 -13    1.21    0.72
  -5   1 -13    1.05    0.71
  -5   1 -13    1.03    0.81
  -6  -1 -13    5.58    0.86
  -6   1 -13    5.01    0.98
  -6   1 -13    4.21    0.84
   6   1  13    4.98    1.50
  -7  -1 -13    6.78    0.94
  -7   1 -13    8.40    1.10
  -7   1 -13    8.87    0.99
   7   1  13   10.51    1.67
  -8  -1 -13    2.03    0.70
   8   1  13    2.15    1.24
  -8   1 -13    1.70    0.64
  -9  -1 -13    0.49    0.61
  -9   1 -13    0.12    0.54
   9   1  13    1.00    1.06
  10   1  13    1.54    0.90
 -10   1 -13    1.05    0.47
  13   2 -13    2.29    0.61
  12  -2 -13    2.85    0.69
  12  -2 -13    4.02    0.65
  12   2 -13    2.77    0.69
  11  -2 -13    0.91    0.72
  11  -2 -13    1.50    0.61
  11   2 -13    2.29    0.65
  10  -2 -13    1.07    0.79
  10  -2 -13    1.99    0.65
  10   2 -13    1.03    0.62
  10   2 -13    0.76    0.60
   9  -2 -13    4.11    0.93
   9  -2 -13    5.33    0.79
   9   2 -13    5.07    0.71
   9   2 -13    3.80    0.74
   8  -2 -13   15.73    1.48
   8  -2 -13   11.79    1.14
   8   2 -13   12.73    1.26
   8   2 -13   11.24    1.07
   7  -2 -13   31.83    2.24
   7  -2 -13   33.82    2.49
   7   2 -13   30.25    2.33
   7   2 -13   29.46    2.18
   6  -2 -13   14.67    1.26
   6  -2 -13   14.64    1.58
   6   2 -13   13.02    1.21
   6   2 -13   13.57    1.39
   5  -2 -13   18.53    1.71
   5  -2 -13   14.92    1.37
   5   2 -13   17.78    1.51
   5   2 -13   15.80    1.36
   4  -2 -13    3.46    0.92
   4  -2 -13    1.99    0.64
   4   2 -13    2.65    0.64
   4   2 -13    2.75    0.74
   3  -2 -13   13.33    1.46
   3  -2 -13   13.28    1.19
   3   2 -13   12.05    1.24
   3   2 -13   12.23    1.20
   2  -2 -13    0.77    0.85
   2  -2 -13    2.28    0.70
   2   2 -13    1.55    0.63
   2   2 -13    1.09    0.66
   1  -2 -13    2.46    0.95
   1  -2 -13    1.82    0.71
   1   2 -13    1.97    0.70
   1   2 -13    2.71    0.71
   0  -2 -13    3.51    1.01
   0   2 -13    2.79    0.74
   0   2  13    2.30    1.19
   0   2 -13    2.67    0.78
   1   2  13    5.81    1.30
  -1   2 -13    5.44    0.87
  -1   2 -13    3.40    0.88
   2   2  13    6.43    1.39
  -2   2 -13    6.12    0.95
   3   2  13   11.18    1.65
  -3   2 -13   11.23    1.27
  -3   2 -13   10.94    0.90
  -4   2 -13    0.75    0.79
   4   2  13    0.27    1.24
  -4   2 -13    0.90    0.50
  -5   2 -13    3.78    0.90
  -5   2 -13    2.67    0.57
   5   2  13    2.60    1.31
   6   2  13    1.86    1.22
   6   2  13    2.22    0.88
  -6   2 -13    1.33    0.53
  -6   2 -13    1.66    0.81
  -7   2 -13    3.71    0.87
   7   2  13    5.35    1.32
  -7   2 -13    4.64    0.61
   7   2  13    4.74    0.77
  -8   2 -13    3.76    0.51
  -8   2 -13    3.50    0.81
   8   2  13    3.62    0.70
   8   2  13    6.07    1.17
   9   2  13    0.82    0.51
  -9   2 -13    2.25    0.62
   9   2  13    2.85    0.89
  11  -3 -13    9.21    0.85
  11  -3 -13    9.44    0.99
  10  -3 -13    5.80    0.90
  10  -3 -13    5.78    0.73
   9  -3 -13    1.49    0.78
   9  -3 -13    3.16    0.64
   9   3 -13    2.16    0.66
   8  -3 -13    1.45    0.59
   8  -3 -13    1.32    0.87
   8   3 -13    0.82    0.64
   7  -3 -13    3.01    0.67
   7  -3 -13    1.79    0.90
   7   3 -13    1.27    0.66
   6  -3 -13    1.94    0.87
   6   3 -13    0.33    0.62
   5  -3 -13    0.51    0.87
   5   3 -13    0.61    0.62
   4  -3 -13    0.71    0.82
   4   3 -13    0.05    0.61
   3  -3 -13    4.98    0.99
   3   3 -13    4.46    0.73
   3   3 -13    4.37    0.83
   2  -3 -13   11.42    1.42
   2   3 -13   11.56    1.09
   2   3 -13   12.25    1.25
   1  -3 -13   15.29    1.62
   1   3 -13   13.81    1.41
   1   3 -13   14.49    1.27
   0  -3 -13    6.44    1.18
   0   3  13    6.75    0.85
   0   3 -13    8.54    0.94
  -1  -3 -13   -0.30    0.86
  -1   3 -13   -0.09    0.67
   1   3  13   -0.10    0.55
  -2  -3 -13    0.34    0.90
  -2   3 -13    2.79    0.76
   2   3  13    2.21    0.63
   2   3  13    2.29    1.22
   3   3  13    0.77    1.13
  -3   3 -13    2.08    0.75
   3   3  13    1.30    0.64
  -4   3 -13    1.20    0.74
   4   3  13    3.25    1.19
   4   3  13    1.80    0.63
   5   3  13    1.02    0.59
  -5   3 -13    1.01    0.70
   5   3  13    0.55    1.01
   6   3  13    0.66    0.51
   6   3  13   -0.42    0.91
  -6   3 -13    0.61    0.68
  -7   3 -13    0.14    0.61
   7   3  13   -0.26    0.74
   7   3  13    0.68    0.47
   8   3  13    0.05    0.40
  -8   3 -13   -0.87    0.52
   9  -4 -13    0.83    0.60
   8  -4 -13    2.79    0.69
  -8   4  13    1.73    0.37
   7  -4 -13    1.29    0.74
   7   4 -13    0.84    0.81
  -7   4  13    1.15    0.34
   6  -4 -13   -0.04    0.72
   6   4 -13    0.16    0.56
  -6   4  13    0.25    0.34
   5  -4 -13    1.65    0.79
   5   4 -13    2.04    0.62
  -5   4  13    2.30    0.43
   4  -4 -13    0.75    0.80
   4   4 -13    1.24    0.64
  -4   4  13    0.20    0.35
   3   4 -13    2.24    0.71
  -3   4  13    2.18    0.46
  -2   4  13    4.93    0.60
  -1   4  13    7.91    0.77
   0   4  13    5.70    0.66
   1   4  13    2.44    0.49
  -1   4 -13    3.37    0.64
  -2   4 -13    7.74    0.89
   2   4  13    5.71    0.68
   3   4  13    8.75    0.84
  -3   4 -13   11.05    1.01
   4   4  13    5.17    0.61
  -4   4 -13    6.40    0.75
  -5   4 -13    0.49    0.49
   5   4  13    0.51    0.33
  -6   4 -13   -0.12    0.44
  -4   5  13    0.84    0.39
  -3   5  13    1.93    0.32
  -2   5  13    0.59    0.28
  -1   5  13    1.52    0.29
   0   5  13    1.54    0.33
  13   0 -14   14.26    1.24
  12   0 -14   29.01    2.13
  11   0 -14   24.85    1.89
  10   0 -14    6.67    0.91
   9   0 -14    3.20    0.75
   9   0 -14    3.07    0.53
   8   0 -14    3.88    0.76
   8   0 -14    4.57    0.81
   8   0 -14    4.79    0.62
   7   0 -14    6.41    0.89
   7   0 -14    5.46    0.86
   7   0 -14    6.07    0.70
   6   0 -14   12.31    1.17
   6   0 -14   10.12    0.95
   5   0 -14    5.40    0.83
   5   0 -14    3.86    0.71
   5   0 -14    5.48    0.67
   4   0 -14   14.24    1.30
   4   0 -14   14.99    1.19
   4   0 -14   15.32    1.38
   3   0 -14    3.68    0.62
   3   0 -14    3.56    0.74
   3   0 -14    4.06    0.83
   2   0 -14    0.88    0.65
   2   0 -14    0.79    0.54
   2   0 -14    1.35    0.75
   1   0 -14   35.74    2.63
   1   0 -14   38.11    2.70
   1   0 -14   35.09    2.53
   0   0 -14   17.72    1.41
   0   0 -14   17.06    1.61
   0   0 -14   16.99    1.58
  -1   0 -14   17.03    1.64
  -1   0 -14   18.64    1.67
  -1   0 -14   17.22    1.46
  -2   0 -14   14.51    1.24
  -2   0 -14   11.22    1.36
  -3   0 -14    5.71    0.94
  -3   0 -14    5.68    0.85
  -4   0 -14    0.92    0.77
  -4   0 -14    1.25    0.68
  -5   0 -14    2.65    0.74
  -6   0 -14   -0.10    0.63
  -7   0 -14    2.52    0.67
  -8   0 -14    0.19    0.56
  -9   0 -14    0.73    0.51
   9   0  14   -0.22    0.95
  13   1 -14    1.20    0.57
  12  -1 -14   -0.16    0.42
  12  -1 -14    0.87    0.69
  12   1 -14    1.52    0.65
  11  -1 -14    4.74    0.64
  11  -1 -14    5.77    0.83
  11   1 -14    4.45    0.78
  10  -1 -14    5.14    0.67
  10  -1 -14    3.40    0.80
  10   1 -14    4.85    0.77
   9  -1 -14   10.23    1.04
   9  -1 -14    9.48    0.92
   9  -1 -14   10.83    1.06
   9   1 -14    9.72    1.00
   9   1 -14    9.64    1.05
   8  -1 -14    4.61    0.75
   8  -1 -14    4.48    0.77
   8  -1 -14    4.02    0.69
   8   1 -14    4.55    0.75
   8   1 -14    3.39    0.79
   7  -1 -14    4.55    0.72
   7  -1 -14    6.27    0.83
   7  -1 -14    4.79    0.88
   7   1 -14    4.12    0.83
   7   1 -14    5.74    0.82
   6  -1 -14    1.23    0.58
   6  -1 -14    0.39    0.64
   6  -1 -14    0.77    0.74
   6   1 -14    1.20    0.66
   6   1 -14    0.49    0.73
   5  -1 -14   15.54    1.49
   5  -1 -14   13.83    1.38
   5  -1 -14   16.17    1.32
   5   1 -14   16.72    1.42
   5   1 -14   16.64    1.45
   4  -1 -14   24.69    1.87
   4  -1 -14   26.49    2.05
   4  -1 -14   23.94    1.95
   4   1 -14   26.34    1.97
   3  -1 -14    6.97    0.83
   3  -1 -14    6.85    0.93
   3  -1 -14    7.07    1.00
   3   1 -14    6.58    0.92
   3   1 -14    6.19    0.63
   2  -1 -14    4.94    0.89
   2  -1 -14    7.44    1.02
   2  -1 -14    6.87    0.85
   2   1 -14    7.14    0.99
   2   1 -14    5.83    0.69
   1  -1 -14   15.56    1.57
   1  -1 -14   16.06    1.36
   1  -1 -14   13.32    1.43
   1   1 -14   15.70    1.52
   1   1 -14   16.31    1.20
   0  -1 -14   19.10    1.71
   0  -1 -14   15.67    1.46
   0  -1 -14   15.50    1.55
   0   1 -14   18.31    1.34
   0   1 -14   17.72    1.58
  -1  -1 -14   14.05    1.43
  -1   1 -14   17.49    1.33
  -1   1 -14   17.47    1.56
  -2  -1 -14    1.59    0.73
  -2   1 -14    3.45    0.69
  -2   1 -14    1.99    0.81
  -3  -1 -14    2.18    0.71
  -3   1 -14    1.52    0.63
  -3   1 -14    1.41    0.69
  -3   1 -14    0.90    0.78
  -4  -1 -14    0.05    0.67
  -4   1 -14    0.67    0.66
  -4   1 -14    0.79    0.74
  -5  -1 -14    2.15    0.70
  -5   1 -14    2.04    0.78
  -5   1 -14    3.14    0.69
  -6  -1 -14    0.26    0.61
  -6   1 -14    0.95    0.60
   6   1  14    0.15    1.19
  -6   1 -14   -0.68    0.71
  -7  -1 -14    1.36    0.61
   7   1  14    0.72    1.12
  -7   1 -14    0.82    0.55
  -7   1 -14    1.01    0.72
  -8  -1 -14    0.08    0.56
  -8   1 -14    0.46    0.49
   8   1  14   -1.04    0.97
  -9  -1 -14    0.80    0.54
  -9   1 -14    0.24    0.41
   9   1  14    1.01    0.87
  12  -2 -14    7.59    0.72
  12   2 -14    7.55    0.77
  11  -2 -14    5.70    0.74
  11  -2 -14    5.55    0.69
  11   2 -14    7.12    0.78
  10  -2 -14    1.35    0.57
  10  -2 -14    1.76    0.67
  10   2 -14    0.68    0.57
  10   2 -14    1.80    0.59
   9  -2 -14    2.73    0.75
   9  -2 -14    2.34    0.64
   9   2 -14    2.76    0.61
   9   2 -14    2.25    0.64
   8  -2 -14    6.19    0.77
   8  -2 -14    5.82    0.94
   8   2 -14    5.21    0.73
   8   2 -14    4.11    0.79
   7  -2 -14    1.91    0.88
   7  -2 -14    2.34    0.68
   7   2 -14    0.68    0.70
   7   2 -14    1.80    0.57
   6  -2 -14    5.88    1.02
   6  -2 -14    5.64    0.77
   6   2 -14    4.85    0.87
   6   2 -14    5.86    0.77
   5  -2 -14    6.10    0.85
   5  -2 -14    7.60    1.14
   5   2 -14    7.00    0.84
   5   2 -14    6.29    0.90
   4  -2 -14    2.19    0.66
   4  -2 -14    2.51    0.89
   4   2 -14    2.54    0.64
   4   2 -14    2.78    0.70
   3  -2 -14    6.55    0.83
   3  -2 -14    6.34    1.03
   3   2 -14    5.21    0.83
   3   2 -14    5.97    0.80
   2  -2 -14    2.29    0.87
   2  -2 -14    1.36    0.60
   2   2 -14    1.39    0.67
   2   2 -14    2.51    0.67
   1  -2 -14    3.34    0.77
   1  -2 -14    5.59    1.06
   1   2 -14    3.88    0.77
   1   2 -14    5.61    0.80
   0  -2 -14   10.17    1.15
   0  -2 -14   10.76    1.37
   0   2  14   12.25    1.62
   0   2 -14   10.78    1.18
   0   2 -14   10.68    1.17
  -1  -2 -14   17.62    1.75
  -1  -2 -14   14.88    1.46
   1   2  14   18.26    1.96
  -1   2 -14   17.12    1.50
  -2   2 -14    6.71    0.99
   2   2  14    8.56    1.42
  -3   2 -14    8.68    1.08
   3   2  14    9.21    1.47
  -4   2 -14    1.11    0.75
   4   2  14    2.00    1.15
   5   2  14    1.23    1.09
  -5   2 -14    0.93    0.73
  -6   2 -14   -0.86    0.68
   6   2  14   -0.29    0.98
   7   2  14    0.52    0.93
   7   2  14    0.41    0.51
  -7   2 -14    0.09    0.62
   8   2  14    0.80    0.77
  -8   2 -14    0.38    0.55
   8   2  14   -0.29    0.46
  10  -3 -14    0.89    0.51
  10  -3 -14    0.41    0.60
   9  -3 -14    6.30    0.88
   9  -3 -14    6.09    0.72
   8  -3 -14    8.53    0.85
   8  -3 -14    7.76    1.07
   8   3 -14    8.70    0.95
   7  -3 -14    7.15    0.77
   7  -3 -14    5.88    1.00
   7   3 -14    5.65    0.79
   6  -3 -14   -0.55    0.78
   6  -3 -14    0.15    0.50
   6   3 -14    0.57    0.55
   5  -3 -14   10.40    1.25
   5   3 -14    6.84    0.86
   4  -3 -14    5.47    1.05
   4   3 -14    5.25    0.65
   4   3 -14    3.25    0.70
   3  -3 -14    1.15    0.83
   3   3 -14    1.88    0.63
   3   3 -14    1.19    0.53
   2  -3 -14    0.59    0.77
   2   3 -14   -0.06    0.55
   2   3 -14    0.22    0.62
   1  -3 -14    1.83    0.84
   1   3 -14    0.69    0.60
   1   3 -14    0.79    0.69
   0  -3 -14    7.93    1.19
   0   3 -14    6.70    0.89
  -1  -3 -14    3.55    0.95
   1   3  14    2.34    0.62
  -1   3 -14    2.52    0.70
  -2  -3 -14    2.67    0.92
   2   3  14    1.71    0.57
  -2   3 -14    1.28    0.69
  -3  -3 -14    0.38    0.76
  -3   3 -14    1.42    0.68
   3   3  14    0.82    0.53
   3   3  14    0.66    1.06
  -4  -3 -14    1.91    0.77
   4   3  14    1.95    1.00
  -4   3 -14    2.36    0.69
   4   3  14    2.38    0.57
  -5  -3 -14    4.06    0.82
  -5   3 -14    3.35    0.73
   5   3  14    4.21    0.62
   5   3  14    5.39    1.02
  -6  -3 -14    6.94    0.96
  -6   3 -14    8.37    0.89
   6   3  14    7.53    0.77
  -7  -3 -14    2.51    0.74
  -7   3 -14    2.66    0.56
   7   3  14    1.21    0.42
   8  -4 -14    6.82    0.83
   7  -4 -14    2.22    0.68
  -7   4  14    3.63    0.41
   6  -4 -14    1.39    0.71
  -6   4  14    2.39    0.38
   5  -4 -14    5.60    0.88
  -5   4  14    4.81    0.52
   4  -4 -14    9.02    1.08
  -4   4  14    7.43    0.70
   3  -4 -14    8.52    1.08
  -3   4  14    7.16    0.70
   2  -4 -14    4.05    0.89
  -2   4  14    3.41    0.49
   1  -4 -14    0.94    0.73
  -1   4  14    0.33    0.35
   0   4  14    0.33    0.36
   1   4  14    1.39    0.38
  -1   4 -14    1.72    0.51
  -2   4 -14    0.10    0.47
   2   4  14    0.13    0.33
  -3   4 -14    0.93    0.49
   3   4  14    0.85    0.33
  -4   4 -14    0.73    0.44
   4   4  14    0.30    0.27
  12   0 -15    0.36    0.60
  11   0 -15    1.03    0.66
  10   0 -15   -0.11    0.65
   9   0 -15   -0.22    0.62
   8   0 -15   10.26    1.10
   8   0 -15   12.33    0.92
   8   0 -15   12.62    1.16
   7   0 -15   16.57    1.49
   7   0 -15   17.77    1.29
   7   0 -15   19.17    1.50
   6   0 -15   14.22    1.28
   6   0 -15   13.40    1.07
   5   0 -15    2.46    0.51
   5   0 -15    2.99    0.74
   4   0 -15    7.07    0.77
   4   0 -15    8.04    0.99
   3   0 -15    8.74    0.88
   3   0 -15    8.40    0.97
   3   0 -15    8.85    1.06
   2   0 -15    2.31    0.79
   2   0 -15    1.93    0.56
   2   0 -15    1.04    0.64
   1   0 -15    0.75    0.65
   1   0 -15    0.87    0.76
   1   0 -15    1.11    0.58
   0   0 -15    0.45    0.70
   0   0 -15    0.40    0.58
   0   0 -15   -0.60    0.69
  -1   0 -15    0.81    0.61
  -1   0 -15    0.86    0.74
  -1   0 -15   -0.01    0.76
  -2   0 -15    2.31    0.79
  -2   0 -15    2.96    0.71
  -2   0 -15    3.93    0.88
  -3   0 -15   10.92    1.09
  -3   0 -15   11.00    1.22
  -4   0 -15   19.88    1.71
  -4   0 -15   21.29    1.61
  -5   0 -15    0.45    0.59
  -6   0 -15   -0.23    0.54
  -7   0 -15    0.12    0.51
  -8   0 -15    1.20    0.49
  12   1 -15    5.59    0.73
  11  -1 -15   13.83    0.99
  11  -1 -15   12.51    1.16
  11   1 -15   12.84    1.14
  10  -1 -15    8.16    0.92
  10  -1 -15    7.90    0.76
  10   1 -15    7.96    0.87
   9  -1 -15   13.50    1.15
   9  -1 -15   13.15    1.02
   9   1 -15   11.01    1.10
   9   1 -15   12.34    1.11
   8  -1 -15   11.30    1.08
   8  -1 -15   11.08    0.95
   8   1 -15    9.98    1.10
   8   1 -15   11.76    1.09
   7  -1 -15    9.91    1.03
   7  -1 -15    9.11    0.91
   7  -1 -15    9.61    1.03
   7   1 -15    9.02    1.08
   7   1 -15   10.74    1.02
   6  -1 -15    8.49    1.07
   6  -1 -15    9.30    1.04
   6  -1 -15    9.29    0.90
   6   1 -15    9.82    1.01
   6   1 -15    9.33    1.07
   5  -1 -15    4.67    0.82
   5  -1 -15    5.94    0.73
   5  -1 -15    4.67    0.86
   5   1 -15    3.71    0.82
   5   1 -15    5.67    0.82
   4  -1 -15    6.49    0.92
   4  -1 -15    5.25    0.85
   4  -1 -15    6.88    0.78
   4   1 -15    4.25    0.86
   4   1 -15    7.21    0.89
   3  -1 -15    5.56    0.89
   3  -1 -15    4.50    0.71
   3  -1 -15    4.54    0.84
   3   1 -15    5.15    0.87
   2  -1 -15    4.98    0.89
   2  -1 -15    5.19    0.71
   2  -1 -15    5.30    0.86
   2   1 -15    4.14    0.49
   2   1 -15    4.02    0.84
   1  -1 -15    4.36    0.85
   1  -1 -15    5.21    0.94
   1  -1 -15    4.68    0.76
   1   1 -15    6.54    0.94
   1   1 -15    4.94    0.57
   0  -1 -15    3.84    0.90
   0  -1 -15    3.05    0.72
   0   1 -15    3.37    0.56
   0   1 -15    3.65    0.87
  -1  -1 -15    1.21    0.84
  -1  -1 -15   -0.36    0.61
  -1   1 -15    0.54    0.53
  -1   1 -15    0.64    0.74
  -2  -1 -15    6.70    0.87
  -2  -1 -15    7.04    1.08
  -2   1 -15    7.86    0.85
  -2   1 -15    6.05    0.96
  -3  -1 -15    6.34    0.89
  -3   1 -15    9.89    0.90
  -3   1 -15    7.51    0.99
  -4  -1 -15    2.88    0.67
  -4   1 -15    2.79    0.76
  -4   1 -15    3.57    0.64
  -5  -1 -15    2.97    0.68
  -5   1 -15    2.79    0.75
  -5   1 -15    3.01    0.60
  -6  -1 -15    4.16    0.74
  -6   1 -15    6.52    0.70
   6   1  15    8.79    1.36
  -6   1 -15    6.29    0.87
  -7  -1 -15    1.43    0.54
   7   1  15    2.27    1.01
  -7   1 -15    1.98    0.46
  -8  -1 -15    1.01    0.50
   8   1  15    2.52    0.86
  -8   1 -15    2.35    0.39
  11  -2 -15    4.00    0.53
  11   2 -15    3.74    0.59
  10  -2 -15    3.03    0.54
  10  -2 -15    2.02    0.55
  10   2 -15    3.40    0.57
   9  -2 -15    0.68    0.61
   9  -2 -15    0.63    0.50
   9   2 -15    1.33    0.55
   9   2 -15    0.32    0.51
   8  -2 -15    3.12    0.71
   8  -2 -15    2.37    0.59
   8   2 -15    2.66    0.63
   8   2 -15    2.47    0.55
   7  -2 -15    8.81    1.10
   7  -2 -15   11.40    0.96
   7   2 -15    9.22    0.91
   7   2 -15    9.95    1.05
   6  -2 -15    3.38    0.81
   6  -2 -15    3.34    0.63
   6   2 -15    3.10    0.72
   6   2 -15    4.23    0.64
   5  -2 -15   11.61    1.08
   5  -2 -15   11.55    1.31
   5   2 -15   11.90    1.08
   5   2 -15   11.62    1.17
   4  -2 -15   11.71    1.11
   4  -2 -15   13.08    1.39
   4   2 -15   10.04    1.12
   4   2 -15   12.76    1.12
   3  -2 -15    3.48    0.67
   3  -2 -15    3.78    0.89
   3   2 -15    3.95    0.70
   3   2 -15    2.85    0.66
   2  -2 -15    1.99    0.81
   2  -2 -15    1.76    0.62
   2   2 -15    0.86    0.61
   2   2 -15    1.48    0.65
   1  -2 -15    2.99    0.87
   1  -2 -15    3.52    0.68
   1   2 -15    2.72    0.74
   1   2 -15    3.12    0.70
   0  -2 -15    1.05    0.66
   0  -2 -15    0.38    0.83
   0   2 -15    0.40    0.64
   0   2 -15    1.49    0.68
   0   2  15    2.01    1.16
  -1  -2 -15    1.50    0.66
  -1  -2 -15    1.01    0.85
  -1   2 -15    2.05    0.70
   1   2  15    0.21    1.11
  -2  -2 -15    2.56    0.71
  -2  -2 -15    2.56    0.87
   2   2  15    2.08    1.14
  -2   2 -15    1.59    0.69
  -3  -2 -15    3.97    0.74
  -3  -2 -15    4.88    0.95
  -3   2 -15    6.22    0.83
   3   2  15    6.78    1.26
  -4  -2 -15    6.08    0.83
   4   2  15    8.24    1.26
  -4   2 -15    6.10    0.88
   5   2  15    1.58    0.96
  -5   2 -15    1.30    0.66
  -6   2 -15    0.71    0.58
   6   2  15    1.28    0.83
  -7   2 -15    0.60    0.52
   7   2  15    0.03    0.71
   9  -3 -15    0.44    0.45
   9  -3 -15    0.56    0.56
   8  -3 -15    4.17    0.73
   8  -3 -15    5.52    0.65
   7  -3 -15    2.77    0.78
   7  -3 -15    4.09    0.58
   7   3 -15    2.64    0.58
   6  -3 -15    3.00    0.81
   6  -3 -15    4.38    0.63
   6   3 -15    2.85    0.58
   5  -3 -15    2.24    0.57
   5  -3 -15    3.02    0.81
   5   3 -15    1.02    0.51
   4  -3 -15    5.34    0.95
   4  -3 -15    4.68    0.72
   4   3 -15    4.78    0.58
   4   3 -15    3.70    0.64
   3  -3 -15    0.70    0.76
   3   3 -15    0.38    0.46
   3   3 -15    0.45    0.52
   2  -3 -15    2.29    0.84
   2   3 -15    3.19    0.64
   2   3 -15    3.62    0.63
   1  -3 -15   10.04    1.26
   1   3 -15   10.05    1.03
   0  -3 -15    5.77    0.98
   0   3 -15    7.04    0.85
  -1  -3 -15    4.11    0.89
  -1   3 -15    2.89    0.67
   1   3  15    2.06    0.52
  -2  -3 -15    1.18    0.76
   2   3  15    0.49    0.45
  -2   3 -15    2.38    0.62
  -3  -3 -15    2.58    0.75
  -3   3 -15    3.10    0.64
   3   3  15    2.62    0.52
  -4  -3 -15    0.10    0.62
   4   3  15    0.32    0.41
  -4   3 -15   -0.48    0.50
  -5  -3 -15    1.53    0.60
   5   3  15    0.83    0.38
  -5   3 -15    1.60    0.52
  -6   3 -15    1.74    0.48
   6  -4 -15    1.30    0.61
   5  -4 -15    2.32    0.67
   4  -4 -15    3.00    0.71
  -4   4  15    3.14    0.40
   3  -4 -15   -0.13    0.63
  -3   4  15    0.06    0.29
   2  -4 -15    1.58    0.67
  -2   4  15    0.66    0.33
   1  -4 -15    0.68    0.64
  -1   4  15    0.78    0.34
   0  -4 -15    0.51    0.57
   0   4  15    0.84    0.33
  -1  -4 -15    0.06    0.54
   1   4  15    0.29    0.29
  -1   4 -15    0.43    0.38
   2   4  15   -0.19    0.27
  11   0 -16    1.26    0.57
  10   0 -16    1.56    0.61
   9   0 -16    0.69    0.59
   8   0 -16   -0.02    0.64
   8   0 -16    0.03    0.59
   7   0 -16    0.80    0.62
   7   0 -16    2.42    0.65
   6   0 -16    1.22    0.65
   6   0 -16    0.92    0.40
   6   0 -16    0.86    0.63
   5   0 -16    6.39    0.85
   5   0 -16    5.31    0.63
   4   0 -16   10.85    1.12
   4   0 -16    9.32    0.85
   3   0 -16    3.73    0.81
   3   0 -16    4.07    0.59
   2   0 -16    7.83    0.83
   2   0 -16    8.45    1.03
   1   0 -16   10.05    0.90
   1   0 -16    8.68    1.07
   1   0 -16    8.78    0.97
   0   0 -16    0.38    0.60
   0   0 -16    1.10    0.73
   0   0 -16    0.51    0.53
  -1   0 -16   -0.74    0.53
  -1   0 -16    0.28    0.63
  -1   0 -16    0.79    0.67
  -2   0 -16   -0.92    0.54
  -2   0 -16    1.18    0.67
  -2   0 -16    0.59    0.65
  -3   0 -16    0.79    0.64
  -3   0 -16   -0.03    0.52
  -3   0 -16    1.61    0.64
  -4   0 -16    0.81    0.54
  -4   0 -16    0.83    0.59
  -5   0 -16    0.42    0.50
  -5   0 -16    0.05    0.55
  -6   0 -16    0.70    0.46
  -7   0 -16    0.54    0.41
  11   1 -16    0.25    0.48
  10  -1 -16    1.86    0.61
  10   1 -16    1.65    0.55
   9  -1 -16   -0.72    0.57
   9  -1 -16    0.43    0.41
   9   1 -16    1.30    0.55
   8  -1 -16    3.20    0.54
   8  -1 -16    4.64    0.72
   8   1 -16    2.86    0.66
   8   1 -16    3.91    0.66
   7  -1 -16    5.55    0.81
   7  -1 -16    5.54    0.65
   7   1 -16    5.70    0.74
   7   1 -16    4.78    0.79
   6  -1 -16   -0.05    0.60
   6  -1 -16    0.63    0.47
   6  -1 -16    0.22    0.58
   6   1 -16   -0.01    0.62
   6   1 -16    0.04    0.56
   5  -1 -16    4.22    0.78
   5  -1 -16    5.13    0.66
   5  -1 -16    4.95    0.79
   5   1 -16    4.51    0.80
   5   1 -16    5.16    0.76
   4  -1 -16   12.92    1.28
   4  -1 -16   14.78    1.15
   4   1 -16   14.05    1.29
   4   1 -16   12.90    1.25
   3  -1 -16    5.98    0.87
   3  -1 -16    6.84    0.92
   3  -1 -16    6.55    0.75
   3   1 -16    5.82    0.86
   3   1 -16    5.72    0.83
   2  -1 -16    1.04    0.67
   2  -1 -16    1.53    0.56
   2  -1 -16    2.61    0.76
   2   1 -16    1.00    0.68
   1  -1 -16    8.67    1.08
   1  -1 -16    8.55    0.93
   1  -1 -16    7.70    1.08
   1   1 -16    9.53    1.07
   0  -1 -16   15.27    1.37
   0  -1 -16   18.28    1.53
   0   1 -16   16.52    1.17
   0   1 -16   16.96    1.49
  -1  -1 -16    5.65    0.96
  -1  -1 -16    5.20    0.77
  -1   1 -16    6.81    0.61
  -1   1 -16    4.87    0.87
  -2  -1 -16    5.70    0.94
  -2  -1 -16    6.20    0.82
  -2   1 -16    7.69    0.70
  -2   1 -16    7.27    0.96
  -3  -1 -16    3.20    0.79
  -3  -1 -16    2.34    0.60
  -3   1 -16    2.03    0.72
  -3   1 -16    3.58    0.51
  -4  -1 -16    0.53    0.66
  -4  -1 -16    0.28    0.50
  -4   1 -16    0.13    0.44
  -4   1 -16    0.54    0.64
  -5  -1 -16    0.97    0.62
  -5  -1 -16    0.39    0.48
  -5   1 -16    1.03    0.63
  -5   1 -16    1.22    0.40
  -6  -1 -16    3.75    0.66
  -6  -1 -16    3.20    0.55
   6   1  16    3.43    0.96
  -6   1 -16    2.95    0.64
  -6   1 -16    4.23    0.43
  -7  -1 -16    6.05    0.71
   7   1  16    3.14    0.84
  10   2 -16    0.74    0.44
   9  -2 -16   -0.68    0.40
   9   2 -16   -0.26    0.43
   8  -2 -16    0.19    0.53
   8  -2 -16    0.03    0.44
   8   2 -16    0.49    0.45
   7  -2 -16    0.06    0.47
   7  -2 -16    0.24    0.59
   7   2 -16    1.04    0.47
   7   2 -16    0.42    0.53
   6  -2 -16    0.50    0.48
   6  -2 -16   -0.39    0.62
   6   2 -16    0.27    0.57
   6   2 -16   -0.38    0.46
   5  -2 -16    1.79    0.54
   5  -2 -16    0.99    0.66
   5   2 -16    0.90    0.56
   5   2 -16    1.73    0.53
   4  -2 -16   13.51    1.31
   4  -2 -16   15.83    1.17
   4   2 -16   15.14    1.18
   4   2 -16   10.86    1.19
   3  -2 -16   14.22    1.12
   3  -2 -16   12.47    1.28
   3   2 -16   13.33    1.14
   3   2 -16   10.11    1.09
   2  -2 -16    5.16    0.90
   2  -2 -16    6.22    0.75
   2   2 -16    5.38    0.74
   2   2 -16    5.29    0.79
   1  -2 -16    4.00    0.82
   1  -2 -16    3.71    0.64
   1   2 -16    2.43    0.66
   1   2 -16    2.78    0.64
   0  -2 -16    1.17    0.70
   0  -2 -16    0.44    0.52
   0   2 -16    1.22    0.63
   0   2 -16    0.29    0.58
  -1  -2 -16    1.36    0.57
  -1  -2 -16    0.36    0.72
  -1   2 -16    1.08    0.63
   1   2  16    1.06    1.05
  -2  -2 -16    1.80    0.74
  -2  -2 -16    2.41    0.57
  -2   2 -16    0.69    0.62
   2   2  16    2.84    1.03
  -3  -2 -16    3.42    0.77
  -3  -2 -16    2.11    0.61
   3   2  16    3.90    1.04
  -3   2 -16    4.41    0.71
  -4  -2 -16    2.15    0.53
  -4  -2 -16    1.00    0.65
  -4   2 -16    1.56    0.59
   4   2  16    1.82    0.87
  -5  -2 -16    1.69    0.48
  -5  -2 -16    0.44    0.59
  -5   2 -16    1.12    0.56
   5   2  16    0.23    0.74
  -6  -2 -16    1.02    0.54
   6   2  16    0.96    0.68
  -6   2 -16    0.36    0.50
   8  -3 -16    6.60    0.72
   7  -3 -16    5.74    0.78
   7  -3 -16    7.62    0.71
   6  -3 -16    6.44    0.88
   6  -3 -16    7.29    0.73
   5  -3 -16    4.15    0.60
   5  -3 -16    3.38    0.76
   4  -3 -16    2.47    0.56
   4  -3 -16    3.28    0.75
   4   3 -16    2.08    0.43
   3  -3 -16    1.44    0.71
   3  -3 -16    0.86    0.51
   3   3 -16    1.24    0.45
   2  -3 -16    1.04    0.52
   2  -3 -16    0.29    0.68
   2   3 -16    0.69    0.47
   1  -3 -16    1.83    0.72
   1   3 -16    1.63    0.55
   0  -3 -16    3.28    0.73
   0   3 -16    3.70    0.63
  -1  -3 -16   -0.39    0.57
  -1   3 -16   -0.46    0.53
  -2  -3 -16    0.31    0.55
  -2   3 -16    0.32    0.52
   2   3  16   -0.05    0.34
  -3  -3 -16    1.91    0.55
   3   3  16    1.10    0.41
  -3   3 -16    2.09    0.54
  -4  -3 -16    0.40    0.47
  -4   3 -16    0.36    0.45
  10   0 -17   19.79    1.45
   9   0 -17    7.86    0.79
   8   0 -17    4.74    0.66
   7   0 -17    0.59    0.51
   7   0 -17   -0.12    0.55
   6   0 -17   -0.45    0.57
   6   0 -17    0.48    0.57
   5   0 -17    0.27    0.57
   5   0 -17    0.48    0.62
   4   0 -17    0.91    0.62
   4   0 -17    1.29    0.40
   3   0 -17    5.37    0.61
   3   0 -17    4.56    0.78
   2   0 -17    6.27    0.67
   2   0 -17    5.36    0.85
   1   0 -17    3.22    0.74
   1   0 -17    4.55    0.58
   0   0 -17    0.37    0.46
   0   0 -17    0.31    0.59
  -1   0 -17    1.54    0.48
  -1   0 -17    1.44    0.60
  -2   0 -17    5.30    0.74
  -3   0 -17   10.34    0.86
  -3   0 -17    7.39    1.17
  -4   0 -17    6.10    0.65
  -5   0 -17    9.32    0.78
  10   1 -17    2.95    0.51
   9  -1 -17    1.92    0.57
   9   1 -17    1.87    0.49
   8  -1 -17    2.93    0.65
   8  -1 -17    4.43    0.48
   8   1 -17    4.26    0.58
   7  -1 -17    7.21    0.81
   7  -1 -17    8.03    0.67
   7   1 -17    6.69    0.85
   7   1 -17    7.09    0.81
   6  -1 -17    8.36    0.73
   6  -1 -17    7.39    0.86
   6  -1 -17    9.21    0.93
   6   1 -17    7.79    0.94
   6   1 -17    7.78    0.85
   5  -1 -17    1.82    0.48
   5  -1 -17    3.31    0.66
   5   1 -17    2.42    0.66
   5   1 -17    2.09    0.57
   4  -1 -17    2.26    0.48
   4  -1 -17    1.61    0.64
   4  -1 -17    1.52    0.62
   4   1 -17    1.81    0.58
   4   1 -17    1.37    0.63
   3  -1 -17    2.95    0.69
   3  -1 -17    2.79    0.54
   3  -1 -17    3.06    0.68
   3   1 -17    3.39    0.67
   3   1 -17    3.67    0.70
   2  -1 -17    1.55    0.49
   2  -1 -17    0.94    0.64
   2  -1 -17    0.83    0.87
   2   1 -17    0.41    0.60
   2   1 -17    0.81    0.58
   1  -1 -17    1.04    0.49
   1  -1 -17    2.20    0.65
   1   1 -17    1.09    0.58
   1   1 -17    0.24    0.59
   0  -1 -17    5.18    0.66
   0  -1 -17    6.70    0.88
   0   1 -17    5.11    0.75
   0   1 -17    4.90    0.77
  -1  -1 -17    4.63    0.72
  -1  -1 -17    4.22    0.61
  -1   1 -17    3.01    0.66
  -1   1 -17    5.27    0.73
  -2  -1 -17    0.13    0.54
  -2  -1 -17    0.12    0.48
  -2   1 -17    0.06    0.56
  -3  -1 -17    1.55    0.59
  -3  -1 -17    1.36    0.47
  -3   1 -17    1.13    0.55
  -4  -1 -17   -0.07    0.42
  -4  -1 -17    0.03    0.51
  -4   1 -17   -0.12    0.49
  -5  -1 -17    0.70    0.45
  -5  -1 -17    0.78    0.42
   5   1  17   -1.03    1.00
  -5   1 -17    0.32    0.47
   8  -2 -17    0.82    0.37
   8   2 -17    0.45    0.39
   7  -2 -17    3.36    0.51
   7   2 -17    3.60    0.49
   6  -2 -17    4.31    0.55
   6  -2 -17    3.51    0.60
   6   2 -17    4.64    0.56
   5  -2 -17    2.07    0.48
   5  -2 -17    1.72    0.60
   5   2 -17    1.61    0.55
   5   2 -17    2.86    0.50
   4  -2 -17    5.12    0.74
   4  -2 -17    4.90    0.62
   4   2 -17    4.40    0.67
   4   2 -17    5.99    0.68
   3  -2 -17    4.51    0.61
   3  -2 -17    3.86    0.72
   3   2 -17    4.12    0.63
   3   2 -17    3.78    0.64
   2  -2 -17    3.27    0.70
   2  -2 -17    3.12    0.55
   2   2 -17    2.94    0.59
   2   2 -17    1.40    0.57
   1  -2 -17    2.10    0.64
   1  -2 -17    1.88    0.50
   1   2 -17    1.11    0.60
   1   2 -17    2.08    0.58
   0  -2 -17   -0.12    0.54
   0  -2 -17   -0.46    0.43
   0   2 -17    0.29    0.54
  -1  -2 -17    1.43    0.48
  -1  -2 -17    1.14    0.58
  -1   2 -17    1.57    0.56
  -2  -2 -17    0.84    0.54
  -2  -2 -17    0.82    0.43
  -2   2 -17    1.19    0.52
  -3  -2 -17    4.37    0.65
  -3  -2 -17    3.52    0.54
  -3   2 -17    4.50    0.62
  -4  -2 -17    7.60    0.80
  -4   2 -17    7.49    0.78
   6  -3 -17    2.49    0.49
   5  -3 -17    1.05    0.52
   4  -3 -17    0.17    0.53
   4  -3 -17    0.56    0.43
   3  -3 -17    0.11    0.41
   3  -3 -17   -0.50    0.49
   3   3 -17    0.39    0.33
   2  -3 -17    0.87    0.57
   2  -3 -17    1.07    0.45
   2   3 -17    0.27    0.39
   1  -3 -17    2.52    0.62
   1   3 -17    3.78    0.51
   0  -3 -17    9.88    1.00
   0   3 -17   11.03    0.90
  -1  -3 -17    1.38    0.51
  -1   3 -17    2.47    0.49
   8   0 -18    2.98    0.53
   7   0 -18    0.51    0.45
   6   0 -18    0.32    0.48
   5   0 -18    7.12    0.82
   5   0 -18    8.39    0.98
   4   0 -18    7.69    0.90
   4   0 -18    6.02    0.78
   3   0 -18   23.15    1.72
   2   0 -18   15.03    1.25
   1   0 -18    8.14    0.64
   1   0 -18    5.55    0.79
   0   0 -18    4.30    0.69
   0   0 -18    6.11    0.57
  -1   0 -18    1.31    0.38
  -1   0 -18    1.73    0.53
  -2   0 -18    0.68    0.33
  -2   0 -18    0.14    0.46
  -3   0 -18    2.22    0.35
   8   1 -18    3.80    0.51
   7  -1 -18    8.10    0.79
   7   1 -18    8.42    0.73
   6  -1 -18    8.29    0.79
   6   1 -18    8.22    0.77
   5  -1 -18    0.69    0.53
   5  -1 -18    1.44    0.39
   5   1 -18    1.27    0.47
   4  -1 -18   -0.03    0.62
   4  -1 -18    0.71    0.38
   4   1 -18    0.04    0.44
   4   1 -18   -0.10    0.58
   3  -1 -18    0.76    0.39
   3   1 -18    0.56    0.49
   3   1 -18    1.19    0.57
   2  -1 -18    0.88    0.41
   2   1 -18    0.59    0.50
   2   1 -18    0.81    0.56
   1  -1 -18    0.84    0.40
   1   1 -18    0.26    0.50
   0  -1 -18    1.18    0.41
   0   1 -18    1.71    0.54
  -1  -1 -18    0.24    0.37
  -1   1 -18    0.24    0.48
  -2  -1 -18    0.42    0.35
  -2   1 -18    0.39    0.46
  -3  -1 -18    1.31    0.35
  -3   1 -18    0.90    0.46
   6  -2 -18    1.73    0.53
   6   2 -18    1.27    0.39
   5  -2 -18    0.24    0.35
   5   2 -18    0.00    0.37
   4  -2 -18    4.79    0.54
   4  -2 -18    4.29    0.58
   4   2 -18    5.32    0.59
   3  -2 -18   11.30    0.84
   3  -2 -18    7.84    0.90
   3   2 -18   12.17    0.90
   2  -2 -18    6.82    0.75
   2  -2 -18    6.82    0.67
   2   2 -18    7.66    0.76
   1  -2 -18    1.50    0.51
   1  -2 -18    2.04    0.42
   1   2 -18    1.01    0.47
   0  -2 -18   -0.45    0.34
   0  -2 -18   -0.38    0.44
   0   2 -18   -0.30    0.43
  -1  -2 -18    0.79    0.44
  -1  -2 -18    0.10    0.34
  -1   2 -18    1.01    0.43
  -2  -2 -18    0.08    0.38
  -2   2 -18    0.64    0.42
   6   0 -19    2.60    0.45
   5   0 -19    0.35    0.40
   4   0 -19    3.46    0.52
   3   0 -19    1.06    0.44
   2   0 -19   -0.29    0.41
   1   0 -19    0.32    0.40
   0   0 -19   -0.29    0.38
   5   1 -19    0.26    0.36
   4   1 -19    0.29    0.38
   3   1 -19    0.58    0.40
   2   1 -19    0.42    0.40
   1   1 -19    4.38    0.54
   0   1 -19    9.05    0.81
   0   0   0    0.00    0.00
;
_shelx_hkl_checksum   90685
